# Supplementary material for: Cooperative and competitive effects associated with Fe(CO)3binding to annelated benzenes
Source: Royal Society of Chemistry journal article supplement (doi:10.1039/c2sc20785k), 2012-09-26
Supplement: c2sc20785k.pdf [file c2sc20785k.pdf]

## Supporting Information for:

### Cooperative and Competitive Effects Associated with $\text{Fe}(\text{CO})_3$ Binding to Annelated Benzenes

XIAOGUANG BAO, DAVID A. HROVAT, AND WESTON THATCHER BORDEN\*

Department of Chemistry and the Center for Advanced, Scientific Computing  
and Modeling, University of North Texas, 1155 Union Circle, #305070,  
Denton, Texas 76203-5070

\* Corresponding author E-mail: [borden@unt.edu](mailto:borden@unt.edu)

This Supporting Information contains fully optimized geometries and energies of **3**, **5**, **6**, **7a/7b**, **8a/8b**, **9a**, **10a**, **11a**, and **12** (*trans*, *gauche*, and TS).

(3) B3LYP/6-31G(d) D<sub>3h</sub> Geometry

|                                         |               |          |
|-----------------------------------------|---------------|----------|
| Nuclear repulsion energy                | 575.78689610  | Hartrees |
| B3LYP/6-31G(d) energy                   | -460.63040964 | Hartrees |
| Zero-point energy correction            | 0.131527      | Hartrees |
| Thermal correction to Enthalpy          | 0.140713      | Hartrees |
| Thermal correction to Gibbs Free Energy | 0.100282      | Hartrees |

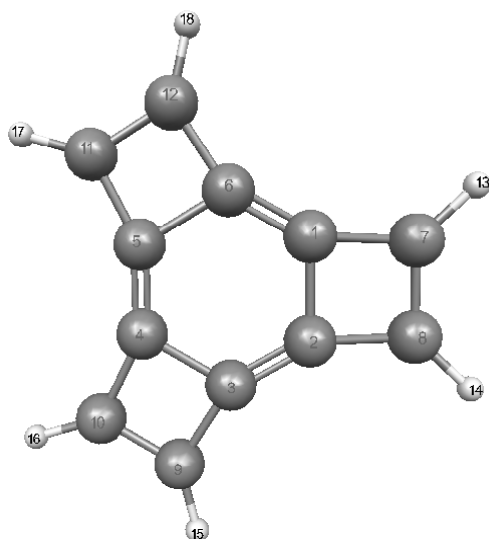

|     | X         | Y         | Z        |
|-----|-----------|-----------|----------|
| C1  | 0.668825  | 1.260989  | 0.000000 |
| C2  | 1.426461  | -0.051275 | 0.000000 |
| C3  | 0.757636  | -1.209714 | 0.000000 |
| C4  | -0.757636 | -1.209714 | 0.000000 |
| C5  | -1.426461 | -0.051275 | 0.000000 |
| C6  | -0.668825 | 1.260989  | 0.000000 |
| C7  | 1.977960  | 1.935681  | 0.000000 |
| C8  | 2.665329  | 0.745123  | 0.000000 |
| C9  | 0.687369  | -2.680804 | 0.000000 |
| C10 | -0.687369 | -2.680804 | 0.000000 |
| C11 | -2.665329 | 0.745123  | 0.000000 |
| C12 | -1.977960 | 1.935681  | 0.000000 |
| H13 | 2.287957  | 2.974679  | 0.000000 |
| H14 | 3.720126  | 0.494089  | 0.000000 |
| H15 | 1.432169  | -3.468768 | 0.000000 |
| H16 | -1.432169 | -3.468768 | 0.000000 |
| H17 | -3.720126 | 0.494089  | 0.000000 |
| H18 | -2.287957 | 2.974679  | 0.000000 |

|             |       |              |           |             |            |            |       |         |       |
|-------------|-------|--------------|-----------|-------------|------------|------------|-------|---------|-------|
| (1-2)       | 1.515 | (1-6)        | 1.338     | (1-7)       | 1.473      | (2-3)      | 1.338 | (2-8)   | 1.473 |
| (3-4)       | 1.515 | (3-9)        | 1.473     | (4-5)       | 1.338      | (4-10)     | 1.473 | (5-6)   | 1.515 |
| (5-11)      | 1.473 | (6-12)       | 1.473     | (7-8)       | 1.375      | (7-13)     | 1.084 | (8-14)  | 1.084 |
| (9-10)      | 1.375 | (9-15)       | 1.084     | (10-16)     | 1.084      | (11-12)    | 1.375 | (11-17) | 1.084 |
| (12-18)     | 1.084 |              |           |             |            |            |       |         |       |
| (2-1-6)     | 120.0 | (2-1-7)      | 87.3      | (6-1-7)     | 152.7      | (1-2-3)    | 120.0 |         |       |
| (1-2-8)     | 87.3  | (3-2-8)      | 152.7     | (2-3-4)     | 120.0      | (2-3-9)    | 152.7 |         |       |
| (4-3-9)     | 87.3  | (3-4-5)      | 120.0     | (3-4-10)    | 87.3       | (5-4-10)   | 152.7 |         |       |
| (4-5-6)     | 120.0 | (4-5-11)     | 152.7     | (6-5-11)    | 87.3       | (1-6-5)    | 120.0 |         |       |
| (1-6-12)    | 152.7 | (5-6-12)     | 87.3      | (1-7-8)     | 92.7       | (1-7-13)   | 133.9 |         |       |
| (8-7-13)    | 133.4 | (2-8-7)      | 92.7      | (2-8-14)    | 133.9      | (7-8-14)   | 133.4 |         |       |
| (3-9-10)    | 92.7  | (3-9-15)     | 133.9     | (10-9-15)   | 133.4      | (4-10-9)   | 92.7  |         |       |
| (4-10-16)   | 133.9 | (9-10-16)    | 133.4     | (5-11-12)   | 92.7       | (5-11-17)  | 133.9 |         |       |
| (12-11-17)  | 133.4 | (6-12-11)    | 92.7      | (6-12-18)   | 133.9      | (11-12-18) | 133.4 |         |       |
| (6-1-2-3)   |       | 0.0          | (6-1-2-8) | 180.0       | (7-1-2-3)  | 180.0      |       |         |       |
| (7-1-2-8)   |       | 0.0          | (2-1-6-5) | 0.0         | (2-1-6-12) | 180.0      |       |         |       |
| (7-1-6-5)   | 180.0 | (7-1-6-12)   | 0.0       | (2-1-7-8)   | 0.0        |            |       |         |       |
| (2-1-7-13)  | 180.0 | (6-1-7-8)    | 180.0     | (6-1-7-13)  | 0.0        |            |       |         |       |
| (1-2-3-4)   | 0.0   | (1-2-3-9)    | 180.0     | (8-2-3-4)   | 180.0      |            |       |         |       |
| (8-2-3-9)   | 0.0   | (1-2-8-7)    | 0.0       | (1-2-8-14)  | 180.0      |            |       |         |       |
| (3-2-8-7)   | 180.0 | (3-2-8-14)   | 0.0       | (2-3-4-5)   | 0.0        |            |       |         |       |
| (2-3-4-10)  | 180.0 | (9-3-4-5)    | 180.0     | (9-3-4-10)  | 0.0        |            |       |         |       |
| (2-3-9-10)  | 180.0 | (2-3-9-15)   | 0.0       | (4-3-9-10)  | 0.0        |            |       |         |       |
| (4-3-9-15)  | 180.0 | (3-4-5-6)    | 0.0       | (3-4-5-11)  | 180.0      |            |       |         |       |
| (10-4-5-6)  | 180.0 | (10-4-5-11)  | 0.0       | (3-4-10-9)  | 0.0        |            |       |         |       |
| (3-4-10-16) | 180.0 | (5-4-10-9)   | 180.0     | (5-4-10-16) | 0.0        |            |       |         |       |
| (4-5-6-1)   | 0.0   | (4-5-6-12)   | 180.0     | (11-5-6-1)  | 180.0      |            |       |         |       |
| (11-5-6-12) | 0.0   | (4-5-11-12)  | 180.0     | (4-5-11-17) | 0.0        |            |       |         |       |
| (6-5-11-12) | 0.0   | (6-5-11-17)  | 180.0     | (1-6-12-11) | 180.0      |            |       |         |       |
| (1-6-12-18) | 0.0   | (5-6-12-11)  | 0.0       | (5-6-12-18) | 180.0      |            |       |         |       |
| (1-7-8-2)   | 0.0   | (1-7-8-14)   | 180.0     | (13-7-8-2)  | 180.0      |            |       |         |       |
| (13-7-8-14) | 0.0   | (3-9-10-4)   | 0.0       | (3-9-10-16) | 180.0      |            |       |         |       |
| (15-9-10-4) | 180.0 | (15-9-10-16) | 0.0       | (5-11-12-6) | 0.0        |            |       |         |       |

|                                  |        |              |        |               |        |
|----------------------------------|--------|--------------|--------|---------------|--------|
| (5-11-12-18)                     | 180.0  | (17-11-12-6) | 180.0  | (17-11-12-18) | 0.0    |
| Frequencies (cm <sup>-1</sup> ): |        |              |        |               |        |
| 145.4                            | 217.8  | 217.8        | 305.8  | 343.7         | 343.7  |
| 374.3                            | 374.3  | 514.3        | 514.3  | 611.8         | 655.2  |
| 700.3                            | 700.3  | 754.2        | 780.1  | 780.1         | 798.8  |
| 889.8                            | 889.8  | 894.2        | 913.8  | 959.4         | 988.1  |
| 988.1                            | 1020.1 | 1020.1       | 1072.9 | 1098.7        | 1098.7 |
| 1124.9                           | 1186.5 | 1186.5       | 1309.7 | 1309.7        | 1359.5 |
| 1476.7                           | 1503.0 | 1503.0       | 1782.3 | 1790.3        | 1790.3 |
| 3227.4                           | 3228.5 | 3228.5       | 3253.4 | 3253.4        | 3254.7 |

(5) B3LYP/6-31G(d)+LANL2DZ C<sub>1</sub> Geometry

|                                         |               |          |
|-----------------------------------------|---------------|----------|
| Nuclear repulsion energy                | 683.62691247  | Hartrees |
| B3LYP/6-31G(d)+LANL2DZ energy           | -618.23450042 | Hartrees |
| Zero-point energy correction            | 0.091084      | Hartrees |
| Thermal correction to Enthalpy          | 0.102946      | Hartrees |
| Thermal correction to Gibbs Free Energy | 0.052240      | Hartrees |

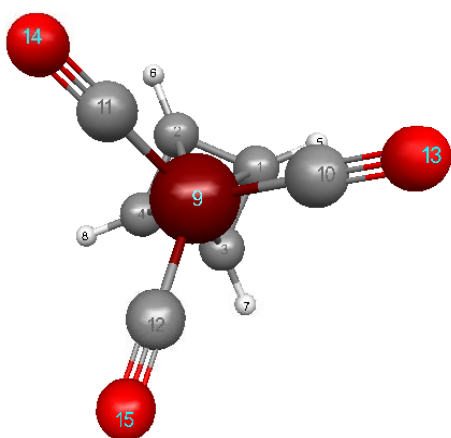

|     | X         | Y         | Z         |
|-----|-----------|-----------|-----------|
| C1  | -1.783357 | -0.619809 | -0.846460 |
| C2  | -1.780397 | 0.806764  | -0.643689 |
| C3  | -1.756058 | -0.838390 | 0.585217  |
| C4  | -1.750275 | 0.609807  | 0.798506  |
| H5  | -1.848426 | -1.263206 | -1.713390 |
| H6  | -1.865604 | 1.665623  | -1.294867 |
| H7  | -1.872850 | -1.703194 | 1.222684  |
| H8  | -1.890200 | 1.253534  | 1.654961  |
| Fe9 | 0.010547  | -0.001012 | -0.006261 |
| C10 | 0.909688  | -1.112706 | -1.072154 |
| C11 | 0.872538  | 1.501830  | -0.419262 |
| C12 | 0.841140  | -0.375470 | 1.520697  |
| O13 | 1.479098  | -1.843194 | -1.758744 |
| O14 | 1.409159  | 2.489668  | -0.674511 |
| O15 | 1.347142  | -0.616298 | 2.527787  |

|            |        |            |        |            |        |           |       |        |       |
|------------|--------|------------|--------|------------|--------|-----------|-------|--------|-------|
| (1-2)      | 1.441  | (1-3)      | 1.449  | (1-5)      | 1.082  | (1-9)     | 2.075 | (2-4)  | 1.456 |
| (2-6)      | 1.081  | (2-9)      | 2.066  | (3-4)      | 1.464  | (3-7)     | 1.081 | (3-9)  | 2.043 |
| (4-8)      | 1.080  | (4-9)      | 2.030  | (9-10)     | 1.783  | (9-11)    | 1.781 | (9-12) | 1.778 |
| (10-13)    | 1.153  | (11-14)    | 1.153  | (12-15)    | 1.153  |           |       |        |       |
| (2-1-3)    | 90.6   | (2-1-5)    | 134.6  | (2-1-9)    | 69.3   | (3-1-5)   | 134.7 |        |       |
| (3-1-9)    | 68.2   | (5-1-9)    | 123.6  | (1-2-4)    | 90.3   | (1-2-6)   | 134.6 |        |       |
| (1-2-9)    | 70.0   | (4-2-6)    | 134.9  | (4-2-9)    | 67.9   | (6-2-9)   | 124.4 |        |       |
| (1-3-4)    | 89.7   | (1-3-7)    | 134.6  | (1-3-9)    | 70.6   | (4-3-7)   | 134.9 |        |       |
| (4-3-9)    | 68.5   | (7-3-9)    | 126.3  | (2-4-3)    | 89.4   | (2-4-8)   | 134.6 |        |       |
| (2-4-9)    | 70.5   | (3-4-8)    | 134.8  | (3-4-9)    | 69.4   | (8-4-9)   | 127.3 |        |       |
| (1-9-2)    | 40.7   | (1-9-3)    | 41.2   | (1-9-4)    | 60.0   | (1-9-10)  | 90.5  |        |       |
| (1-9-11)   | 125.2  | (1-9-12)   | 133.5  | (2-9-3)    | 60.0   | (2-9-4)   | 41.6  |        |       |
| (2-9-10)   | 119.8  | (2-9-11)   | 91.0   | (2-9-12)   | 138.8  | (3-9-4)   | 42.1  |        |       |
| (3-9-10)   | 110.7  | (3-9-11)   | 146.3  | (3-9-12)   | 94.0   | (4-9-10)  | 149.5 |        |       |
| (4-9-11)   | 104.9  | (4-9-12)   | 97.4   | (10-9-11)  | 98.2   | (10-9-12) | 98.4  |        |       |
| (11-9-12)  | 98.7   | (9-10-13)  | 179.2  | (9-11-14)  | 178.6  | (9-12-15) | 178.2 |        |       |
| (3-1-2-4)  | 0.1    | (3-1-2-6)  | -174.6 | (3-1-2-9)  | 66.4   |           |       |        |       |
| (5-1-2-4)  | 176.5  | (5-1-2-6)  | 1.7    | (5-1-2-9)  | -117.3 |           |       |        |       |
| (9-1-2-4)  | -66.3  | (9-1-2-6)  | 119.0  | (2-1-3-4)  | -0.1   |           |       |        |       |
| (2-1-3-7)  | 170.3  | (2-1-3-9)  | -67.3  | (5-1-3-4)  | -176.4 |           |       |        |       |
| (5-1-3-7)  | -6.0   | (5-1-3-9)  | 116.3  | (9-1-3-4)  | 67.2   |           |       |        |       |
| (9-1-3-7)  | -122.3 | (2-1-9-3)  | 99.4   | (2-1-9-4)  | 49.3   |           |       |        |       |
| (2-1-9-10) | -138.7 | (2-1-9-11) | -38.3  | (2-1-9-12) | 119.2  |           |       |        |       |
| (3-1-9-2)  | -99.4  | (3-1-9-4)  | -50.1  | (3-1-9-10) | 121.9  |           |       |        |       |
| (3-1-9-11) | -137.7 | (3-1-9-12) | 19.8   | (5-1-9-2)  | 130.5  |           |       |        |       |
| (5-1-9-3)  | -130.1 | (5-1-9-4)  | 179.8  | (5-1-9-10) | -8.2   |           |       |        |       |
| (5-1-9-11) | 92.2   | (5-1-9-12) | -110.3 | (1-2-4-3)  | -0.1   |           |       |        |       |

|             |        |              |        |              |        |
|-------------|--------|--------------|--------|--------------|--------|
| (1-2-4-8)   | -168.2 | (1-2-4-9)    | 68.2   | (6-2-4-3)    | 174.6  |
| (6-2-4-8)   | 6.5    | (6-2-4-9)    | -117.1 | (9-2-4-3)    | -68.3  |
| (9-2-4-8)   | 123.6  | (1-2-9-3)    | -48.6  | (1-2-9-4)    | -98.9  |
| (1-2-9-10)  | 49.4   | (1-2-9-11)   | 149.5  | (1-2-9-12)   | -106.0 |
| (4-2-9-1)   | 98.9   | (4-2-9-3)    | 50.3   | (4-2-9-10)   | 148.3  |
| (4-2-9-11)  | -111.6 | (4-2-9-12)   | -7.1   | (6-2-9-1)    | -131.0 |
| (6-2-9-3)   | -179.6 | (6-2-9-4)    | 130.2  | (6-2-9-10)   | -81.5  |
| (6-2-9-11)  | 18.6   | (6-2-9-12)   | 123.0  | (1-3-4-2)    | 0.1    |
| (1-3-4-8)   | 168.2  | (1-3-4-9)    | -69.2  | (7-3-4-2)    | -170.3 |
| (7-3-4-8)   | -2.2   | (7-3-4-9)    | 120.4  | (9-3-4-2)    | 69.3   |
| (9-3-4-8)   | -122.6 | (1-3-9-2)    | 48.0   | (1-3-9-4)    | 97.6   |
| (1-3-9-10)  | -65.2  | (1-3-9-11)   | 82.2   | (1-3-9-12)   | -165.8 |
| (4-3-9-1)   | -97.6  | (4-3-9-2)    | -49.6  | (4-3-9-10)   | -162.8 |
| (4-3-9-11)  | -15.5  | (4-3-9-12)   | 96.6   | (7-3-9-1)    | 131.7  |
| (7-3-9-2)   | 179.7  | (7-3-9-4)    | -130.7 | (7-3-9-10)   | 66.4   |
| (7-3-9-11)  | -146.2 | (7-3-9-12)   | -34.1  | (2-4-9-1)    | -48.1  |
| (2-4-9-3)   | -97.0  | (2-4-9-10)   | -64.0  | (2-4-9-11)   | 74.2   |
| (2-4-9-12)  | 175.3  | (3-4-9-1)    | 48.9   | (3-4-9-2)    | 97.0   |
| (3-4-9-10)  | 32.9   | (3-4-9-11)   | 171.2  | (3-4-9-12)   | -87.8  |
| (8-4-9-1)   | -179.9 | (8-4-9-2)    | -131.8 | (8-4-9-3)    | 131.3  |
| (8-4-9-10)  | 164.2  | (8-4-9-11)   | -57.6  | (8-4-9-12)   | 43.5   |
| (1-9-10-13) | -41.0  | (2-9-10-13)  | -70.7  | (3-9-10-13)  | -4.3   |
| (4-9-10-13) | -27.2  | (11-9-10-13) | -166.7 | (12-9-10-13) | 93.2   |
| (1-9-11-14) | 68.0   | (2-9-11-14)  | 44.1   | (3-9-11-14)  | 15.0   |
| (4-9-11-14) | 4.4    | (10-9-11-14) | 164.4  | (12-9-11-14) | -95.7  |
| (1-9-12-15) | -41.5  | (2-9-12-15)  | 18.4   | (3-9-12-15)  | -28.6  |
| (4-9-12-15) | 13.6   | (10-9-12-15) | -140.2 | (11-9-12-15) | 120.0  |

Frequencies (cm<sup>-1</sup>): 10.6 87.9 90.8 106.4 133.8 135.0 352.0 368.1  
 411.7 414.0 467.5 475.9 513.6 519.1 523.7 590.2 607.4 608.9  
 626.4 759.4 764.1 832.7 841.6 946.7 957.5 964.2 984.4 1197.6  
 1220.5 1273.5 1374.9 1379.2 2085.9 2089.4 2136.8 3264.1 3282.7 3283.9

(6) B3LYP/6-31G(d)+LANL2DZ C<sub>s</sub> Geometry

|                                         |                        |
|-----------------------------------------|------------------------|
| Nuclear repulsion energy                | 1437.85359241 Hartrees |
| B3LYP/6-31G(d)+LANL2DZ energy           | -924.08860278 Hartrees |
| Zero-point energy correction            | 0.157643 Hartrees      |
| Thermal correction to Enthalpy          | 0.174387 Hartrees      |
| Thermal correction to Gibbs Free Energy | 0.113700 Hartrees      |

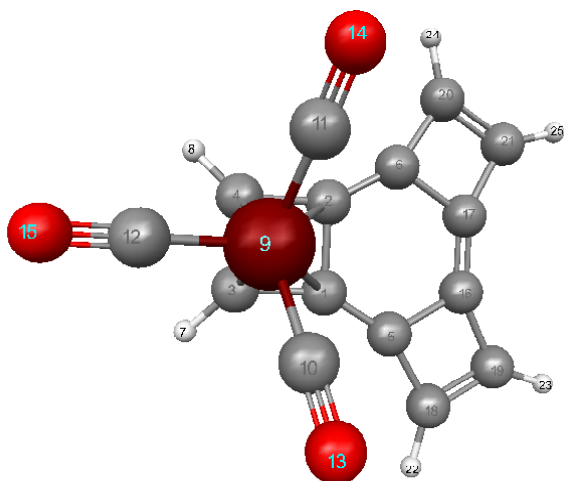

|     | X         | Y         | Z         |
|-----|-----------|-----------|-----------|
| C1  | 0.998911  | 0.646830  | 0.753332  |
| C2  | 0.998911  | 0.646830  | -0.753332 |
| C3  | 1.663622  | -0.677942 | 0.737361  |
| C4  | 1.663622  | -0.677942 | -0.737361 |
| C5  | 0.429324  | 1.677239  | 1.424512  |
| C6  | 0.429324  | 1.677239  | -1.424512 |
| H7  | 2.304550  | -1.158967 | 1.465555  |
| H8  | 2.304550  | -1.158967 | -1.465555 |
| Fe9 | -0.047267 | -1.411781 | 0.000000  |
| C10 | -1.120369 | -1.569803 | 1.456160  |
| C11 | -1.120369 | -1.569803 | -1.456160 |
| C12 | 0.476510  | -3.077531 | 0.000000  |
| O13 | -1.776472 | -1.680189 | 2.395714  |
| O14 | -1.776472 | -1.680189 | -2.395714 |
| O15 | 0.857174  | -4.166926 | 0.000000  |
| C16 | -0.182257 | 2.814365  | 0.670403  |
| C17 | -0.182257 | 2.814365  | -0.670403 |
| C18 | 0.089290  | 2.392246  | 2.670762  |

|            |        |            |        |            |        |            |          |           |       |
|------------|--------|------------|--------|------------|--------|------------|----------|-----------|-------|
|            |        |            |        |            | C19    | -0.480574  | 3.436491 | 1.987749  |       |
|            |        |            |        |            | C20    | 0.089290   | 2.392246 | -2.670762 |       |
|            |        |            |        |            | C21    | -0.480574  | 3.436491 | -1.987749 |       |
|            |        |            |        |            | H22    | 0.233036   | 2.177223 | 3.723158  |       |
|            |        |            |        |            | H23    | -0.957238  | 4.360145 | 2.294028  |       |
|            |        |            |        |            | H24    | 0.233036   | 2.177223 | -3.723158 |       |
|            |        |            |        |            | H25    | -0.957238  | 4.360145 | -2.294028 |       |
| (1-2)      | 1.507  | (1-3)      | 1.482  | (1-5)      | 1.355  | (1-9)      | 2.429    | (2-4)     | 1.482 |
| (2-6)      | 1.355  | (2-9)      | 2.429  | (3-4)      | 1.475  | (3-7)      | 1.083    | (3-9)     | 2.002 |
| (4-8)      | 1.083  | (4-9)      | 2.002  | (5-16)     | 1.495  | (5-18)     | 1.476    | (6-17)    | 1.495 |
| (6-20)     | 1.476  | (9-10)     | 1.816  | (9-11)     | 1.816  | (9-12)     | 1.746    | (10-13)   | 1.151 |
| (11-14)    | 1.151  | (12-15)    | 1.154  | (16-17)    | 1.341  | (16-19)    | 1.487    | (17-21)   | 1.487 |
| (18-19)    | 1.372  | (18-22)    | 1.084  | (19-23)    | 1.084  | (20-21)    | 1.372    | (20-24)   | 1.084 |
| (21-25)    | 1.084  |            |        |            |        |            |          |           |       |
| (2-1-3)    | 89.4   | (2-1-5)    | 119.7  | (2-1-9)    | 71.9   | (3-1-5)    | 150.8    |           |       |
| (3-1-9)    | 55.4   | (5-1-9)    | 128.1  | (1-2-4)    | 89.4   | (1-2-6)    | 119.7    |           |       |
| (1-2-9)    | 71.9   | (4-2-6)    | 150.8  | (4-2-9)    | 55.4   | (6-2-9)    | 128.1    |           |       |
| (1-3-4)    | 90.6   | (1-3-7)    | 130.9  | (1-3-9)    | 87.0   | (4-3-7)    | 132.3    |           |       |
| (4-3-9)    | 68.4   | (7-3-9)    | 126.2  | (2-4-3)    | 90.6   | (2-4-8)    | 130.9    |           |       |
| (2-4-9)    | 87.0   | (3-4-8)    | 132.3  | (3-4-9)    | 68.4   | (8-4-9)    | 126.2    |           |       |
| (1-5-16)   | 120.0  | (1-5-18)   | 152.0  | (16-5-18)  | 87.9   | (2-6-17)   | 120.0    |           |       |
| (2-6-20)   | 152.0  | (17-6-20)  | 87.9   | (1-9-2)    | 36.1   | (1-9-3)    | 37.5     |           |       |
| (1-9-4)    | 55.6   | (1-9-10)   | 94.6   | (1-9-11)   | 125.2  | (1-9-12)   | 132.8    |           |       |
| (2-9-3)    | 55.6   | (2-9-4)    | 37.5   | (2-9-10)   | 125.2  | (2-9-11)   | 94.6     |           |       |
| (2-9-12)   | 132.8  | (3-9-4)    | 43.2   | (3-9-10)   | 104.0  | (3-9-11)   | 146.3    |           |       |
| (3-9-12)   | 95.4   | (4-9-10)   | 146.3  | (4-9-11)   | 104.0  | (4-9-12)   | 95.4     |           |       |
| (10-9-11)  | 106.6  | (10-9-12)  | 95.4   | (11-9-12)  | 95.4   | (9-10-13)  | 178.5    |           |       |
| (9-11-14)  | 178.5  | (9-12-15)  | 178.2  | (5-16-17)  | 120.3  | (5-16-19)  | 87.3     |           |       |
| (17-16-19) | 152.4  | (6-17-16)  | 120.3  | (6-17-21)  | 87.3   | (16-17-21) | 152.4    |           |       |
| (5-18-19)  | 92.5   | (5-18-22)  | 133.9  | (19-18-22) | 133.6  | (16-19-18) | 92.3     |           |       |
| (16-19-23) | 134.0  | (18-19-23) | 133.7  | (6-20-21)  | 92.5   | (6-20-24)  | 133.9    |           |       |
| (21-20-24) | 133.6  | (17-21-20) | 92.3   | (17-21-25) | 134.0  | (20-21-25) | 133.7    |           |       |
| (3-1-2-4)  | 0.0    | (3-1-2-6)  | 177.7  | (3-1-2-9)  | 53.6   |            |          |           |       |
| (5-1-2-4)  | -177.7 | (5-1-2-6)  | 0.0    | (5-1-2-9)  | -124.1 |            |          |           |       |
| (9-1-2-4)  | -53.6  | (9-1-2-6)  | 124.1  | (2-1-3-4)  | 0.0    |            |          |           |       |
| (2-1-3-7)  | 154.1  | (2-1-3-9)  | -68.3  | (5-1-3-4)  | 175.9  |            |          |           |       |
| (5-1-3-7)  | -30.0  | (5-1-3-9)  | 107.6  | (9-1-3-4)  | 68.3   |            |          |           |       |
| (9-1-3-7)  | -137.6 | (2-1-5-16) | -0.7   | (2-1-5-18) | -176.0 |            |          |           |       |
| (3-1-5-16) | -176.0 | (3-1-5-18) | 8.7    | (9-1-5-16) | -90.3  |            |          |           |       |
| (9-1-5-18) | 94.4   | (2-1-9-3)  | 102.2  | (2-1-9-4)  | 46.2   |            |          |           |       |
| (2-1-9-10) | -150.7 | (2-1-9-11) | -36.6  | (2-1-9-12) | 107.6  |            |          |           |       |
| (3-1-9-2)  | -102.2 | (3-1-9-4)  | -56.0  | (3-1-9-10) | 107.1  |            |          |           |       |
| (3-1-9-11) | -138.8 | (3-1-9-12) | 5.4    | (5-1-9-2)  | 114.0  |            |          |           |       |
| (5-1-9-3)  | -143.8 | (5-1-9-4)  | 160.2  | (5-1-9-10) | -36.8  |            |          |           |       |
| (5-1-9-11) | 77.3   | (5-1-9-12) | -138.5 | (1-2-4-3)  | 0.0    |            |          |           |       |
| (1-2-4-8)  | -154.1 | (1-2-4-9)  | 68.3   | (6-2-4-3)  | -175.9 |            |          |           |       |
| (6-2-4-8)  | 30.0   | (6-2-4-9)  | -107.6 | (9-2-4-3)  | -68.3  |            |          |           |       |
| (9-2-4-8)  | 137.6  | (1-2-6-17) | 0.7    | (1-2-6-20) | 176.0  |            |          |           |       |
| (4-2-6-17) | 176.0  | (4-2-6-20) | -8.7   | (9-2-6-17) | 90.3   |            |          |           |       |
| (9-2-6-20) | -94.4  | (1-2-9-3)  | -46.2  | (1-2-9-4)  | -102.2 |            |          |           |       |
| (1-2-9-10) | 36.6   | (1-2-9-11) | 150.7  | (1-2-9-12) | -107.6 |            |          |           |       |
| (4-2-9-1)  | 102.2  | (4-2-9-3)  | 56.0   | (4-2-9-10) | 138.8  |            |          |           |       |
| (4-2-9-11) | -107.1 | (4-2-9-12) | -5.4   | (6-2-9-1)  | -114.0 |            |          |           |       |
| (6-2-9-3)  | -160.2 | (6-2-9-4)  | 143.8  | (6-2-9-10) | -77.3  |            |          |           |       |
| (6-2-9-11) | 36.8   | (6-2-9-12) | 138.5  | (1-3-4-2)  | 0.0    |            |          |           |       |
| (1-3-4-8)  | 153.5  | (1-3-4-9)  | -86.6  | (7-3-4-2)  | -153.5 |            |          |           |       |
| (7-3-4-8)  | 0.0    | (7-3-4-9)  | 119.9  | (9-3-4-2)  | 86.6   |            |          |           |       |
| (9-3-4-8)  | -119.9 | (1-3-9-2)  | 44.3   | (1-3-9-4)  | 91.8   |            |          |           |       |
| (1-3-9-10) | -79.1  | (1-3-9-11) | 75.8   | (1-3-9-12) | -176.0 |            |          |           |       |
| (4-3-9-1)  | -91.8  | (4-3-9-2)  | -47.6  | (4-3-9-10) | -170.9 |            |          |           |       |

|               |        |               |        |               |        |
|---------------|--------|---------------|--------|---------------|--------|
| (4-3-9-11)    | -16.0  | (4-3-9-12)    | 92.1   | (7-3-9-1)     | 140.8  |
| (7-3-9-2)     | -174.9 | (7-3-9-4)     | -127.3 | (7-3-9-10)    | 61.7   |
| (7-3-9-11)    | -143.4 | (7-3-9-12)    | -35.2  | (2-4-9-1)     | -44.3  |
| (2-4-9-3)     | -91.8  | (2-4-9-10)    | -75.8  | (2-4-9-11)    | 79.1   |
| (2-4-9-12)    | 176.0  | (3-4-9-1)     | 47.6   | (3-4-9-2)     | 91.8   |
| (3-4-9-10)    | 16.0   | (3-4-9-11)    | 170.9  | (3-4-9-12)    | -92.1  |
| (8-4-9-1)     | 174.9  | (8-4-9-2)     | -140.8 | (8-4-9-3)     | 127.3  |
| (8-4-9-10)    | 143.4  | (8-4-9-11)    | -61.7  | (8-4-9-12)    | 35.2   |
| (1-5-16-17)   | 0.7    | (1-5-16-19)   | -178.1 | (18-5-16-17)  | 178.5  |
| (18-5-16-19)  | -0.3   | (1-5-18-19)   | 176.3  | (1-5-18-22)   | -3.7   |
| (16-5-18-19)  | 0.3    | (16-5-18-22)  | -179.7 | (2-6-17-16)   | -0.7   |
| (2-6-17-21)   | 178.1  | (20-6-17-16)  | -178.5 | (20-6-17-21)  | 0.3    |
| (2-6-20-21)   | -176.3 | (2-6-20-24)   | 3.7    | (17-6-20-21)  | -0.3   |
| (17-6-20-24)  | 179.7  | (1-9-10-13)   | -77.2  | (2-9-10-13)   | -97.9  |
| (3-9-10-13)   | -40.3  | (4-9-10-13)   | -51.5  | (11-9-10-13)  | 153.9  |
| (12-9-10-13)  | 56.6   | (1-9-11-14)   | 97.9   | (2-9-11-14)   | 77.2   |
| (3-9-11-14)   | 51.5   | (4-9-11-14)   | 40.3   | (10-9-11-14)  | -153.9 |
| (12-9-11-14)  | -56.6  | (1-9-12-15)   | -25.0  | (2-9-12-15)   | 25.0   |
| (3-9-12-15)   | -21.7  | (4-9-12-15)   | 21.7   | (10-9-12-15)  | -126.3 |
| (11-9-12-15)  | 126.3  | (5-16-17-6)   | 0.0    | (5-16-17-21)  | -177.3 |
| (19-16-17-6)  | 177.3  | (19-16-17-21) | 0.0    | (5-16-19-18)  | 0.3    |
| (5-16-19-23)  | 179.9  | (17-16-19-18) | -177.4 | (17-16-19-23) | 2.2    |
| (6-17-21-20)  | -0.3   | (6-17-21-25)  | -179.9 | (16-17-21-20) | 177.4  |
| (16-17-21-25) | -2.2   | (5-18-19-16)  | -0.3   | (5-18-19-23)  | 180.0  |
| (22-18-19-16) | 179.7  | (22-18-19-23) | 0.1    | (6-20-21-17)  | 0.3    |
| (6-20-21-25)  | 180.0  | (24-20-21-17) | -179.7 | (24-20-21-25) | -0.1   |

|                                  |        |        |        |        |        |        |        |        |        |        |
|----------------------------------|--------|--------|--------|--------|--------|--------|--------|--------|--------|--------|
| Frequencies (cm <sup>-1</sup> ): | -3.7   | 45.1   | 48.4   | 70.9   | 74.3   | 98.5   | 107.4  | 122.0  |        |        |
|                                  | 171.8  | 214.1  | 252.4  | 335.5  | 338.8  | 342.5  | 383.7  | 400.1  | 423.3  | 449.0  |
|                                  | 456.5  | 463.9  | 472.5  | 488.1  | 508.2  | 524.8  | 532.9  | 563.5  | 590.5  | 616.1  |
|                                  | 620.9  | 648.4  | 669.4  | 696.6  | 745.3  | 765.1  | 775.1  | 820.8  | 829.2  | 856.5  |
|                                  | 888.1  | 888.2  | 916.7  | 965.5  | 990.0  | 994.0  | 1026.4 | 1057.5 | 1125.1 | 1126.3 |
|                                  | 1160.0 | 1167.1 | 1202.0 | 1272.9 | 1286.4 | 1304.4 | 1338.2 | 1487.2 | 1518.5 | 1688.7 |
|                                  | 1696.9 | 1775.5 | 2079.8 | 2085.3 | 2129.8 | 3238.3 | 3239.3 | 3241.3 | 3255.8 | 3264.5 |

**(7a)** B3LYP/6-31G(d)+LANL2DZ C<sub>2</sub> Geometry

|                                         |                |          |
|-----------------------------------------|----------------|----------|
| Nuclear repulsion energy                | 2599.00099260  | Hartrees |
| B3LYP/6-31G(d)+LANL2DZ energy           | -1387.57932060 | Hartrees |
| Zero-point energy correction            | 0.183979       | Hartrees |
| Thermal correction to Enthalpy          | 0.209969       | Hartrees |
| Thermal correction to Gibbs Free Energy | 0.125674       | Hartrees |

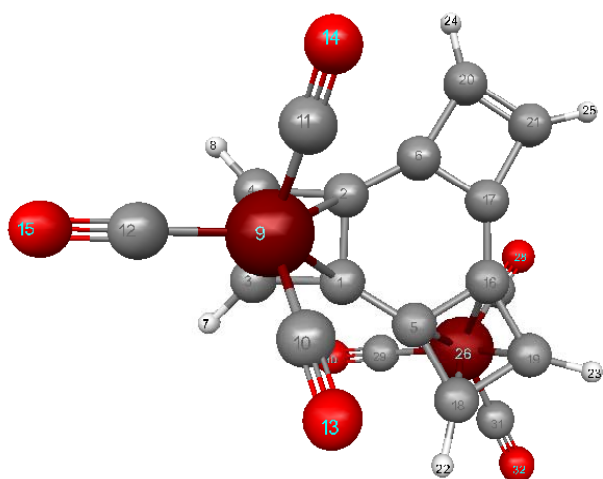

|     | X         | Y         | Z         |
|-----|-----------|-----------|-----------|
| C1  | -0.011748 | 0.710547  | -0.443013 |
| C2  | -0.011748 | 1.420209  | 0.836184  |
| C3  | 0.038501  | 1.978849  | -1.166308 |
| C4  | -0.000833 | 2.706265  | 0.119565  |
| C5  | 0.011748  | -0.710547 | -0.443013 |
| C6  | -0.015319 | 0.696876  | 2.033757  |
| H7  | 0.329014  | 2.247412  | -2.172011 |
| H8  | 0.277830  | 3.708707  | 0.412974  |
| Fe9 | -1.809055 | 2.001350  | -0.374804 |
| C10 | -2.789888 | 0.812497  | -1.302612 |
| C11 | -2.842668 | 2.242184  | 1.079910  |
| C12 | -2.328717 | 3.444165  | -1.243761 |
| O13 | -3.393756 | 0.047171  | -1.915751 |
| O14 | -3.497008 | 2.432304  | 2.008526  |
| O15 | -2.639384 | 4.395533  | -1.816141 |
| C16 | 0.011748  | -1.420209 | 0.836184  |





|               |        |               |        |               |        |
|---------------|--------|---------------|--------|---------------|--------|
| (9-1-5-26)    | -175.6 | (2-1-9-3)     | 100.6  | (2-1-9-4)     | 47.6   |
| (2-1-9-10)    | -145.7 | (2-1-9-11)    | -40.4  | (2-1-9-12)    | 111.8  |
| (3-1-9-2)     | -100.6 | (3-1-9-4)     | -53.0  | (3-1-9-10)    | 113.7  |
| (3-1-9-11)    | -141.1 | (3-1-9-12)    | 11.2   | (5-1-9-2)     | 113.2  |
| (5-1-9-3)     | -146.2 | (5-1-9-4)     | 160.8  | (5-1-9-10)    | -32.5  |
| (5-1-9-11)    | 72.7   | (5-1-9-12)    | -135.1 | (1-2-4-3)     | -1.5   |
| (1-2-4-8)     | -159.8 | (1-2-4-9)     | 66.8   | (6-2-4-3)     | 178.0  |
| (6-2-4-8)     | 19.7   | (6-2-4-9)     | -113.7 | (9-2-4-3)     | -68.3  |
| (9-2-4-8)     | 133.4  | (1-2-6-17)    | 1.6    | (1-2-6-20)    | 179.6  |
| (4-2-6-17)    | -177.8 | (4-2-6-20)    | 0.1    | (9-2-6-17)    | 87.5   |
| (9-2-6-20)    | -94.6  | (1-2-9-3)     | -48.1  | (1-2-9-4)     | -101.6 |
| (1-2-9-10)    | 42.2   | (1-2-9-11)    | 147.7  | (1-2-9-12)    | -109.0 |
| (4-2-9-1)     | 101.6  | (4-2-9-3)     | 53.5   | (4-2-9-10)    | 143.8  |
| (4-2-9-11)    | -110.7 | (4-2-9-12)    | -7.3   | (6-2-9-1)     | -112.8 |
| (6-2-9-3)     | -160.9 | (6-2-9-4)     | 145.6  | (6-2-9-10)    | -70.6  |
| (6-2-9-11)    | 34.9   | (6-2-9-12)    | 138.3  | (1-3-4-2)     | 1.5    |
| (1-3-4-8)     | 159.7  | (1-3-4-9)     | -76.6  | (7-3-4-2)     | -160.1 |
| (7-3-4-8)     | -1.9   | (7-3-4-9)     | 121.8  | (9-3-4-2)     | 78.1   |
| (9-3-4-8)     | -123.7 | (1-3-9-2)     | 45.8   | (1-3-9-4)     | 94.8   |
| (1-3-9-10)    | -72.9  | (1-3-9-11)    | 76.6   | (1-3-9-12)    | -172.0 |
| (4-3-9-1)     | -94.8  | (4-3-9-2)     | -49.1  | (4-3-9-10)    | -167.8 |
| (4-3-9-11)    | -18.2  | (4-3-9-12)    | 93.1   | (7-3-9-1)     | 135.7  |
| (7-3-9-2)     | -178.5 | (7-3-9-4)     | -129.5 | (7-3-9-10)    | 62.8   |
| (7-3-9-11)    | -147.7 | (7-3-9-12)    | -36.3  | (2-4-9-1)     | -45.3  |
| (2-4-9-3)     | -94.0  | (2-4-9-10)    | -71.3  | (2-4-9-11)    | 76.0   |
| (2-4-9-12)    | 174.8  | (3-4-9-1)     | 48.7   | (3-4-9-2)     | 94.0   |
| (3-4-9-10)    | 22.8   | (3-4-9-11)    | 170.1  | (3-4-9-12)    | -91.1  |
| (8-4-9-1)     | 177.8  | (8-4-9-2)     | -136.9 | (8-4-9-3)     | 129.1  |
| (8-4-9-10)    | 151.9  | (8-4-9-11)    | -60.9  | (8-4-9-12)    | 38.0   |
| (1-5-16-17)   | -1.3   | (1-5-16-19)   | 178.5  | (1-5-16-26)   | -122.4 |
| (18-5-16-17)  | -178.2 | (18-5-16-19)  | 1.5    | (18-5-16-26)  | 60.6   |
| (26-5-16-17)  | 121.2  | (26-5-16-19)  | -59.1  | (1-5-18-19)   | -176.2 |
| (1-5-18-22)   | -14.3  | (1-5-18-26)   | 116.2  | (16-5-18-19)  | -1.5   |
| (16-5-18-22)  | 160.3  | (16-5-18-26)  | -69.2  | (26-5-18-19)  | 67.6   |
| (26-5-18-22)  | -130.6 | (1-5-26-16)   | 113.2  | (1-5-26-18)   | -146.2 |
| (1-5-26-19)   | 160.8  | (1-5-26-27)   | 72.7   | (1-5-26-29)   | -32.5  |
| (1-5-26-31)   | -135.1 | (16-5-26-18)  | 100.6  | (16-5-26-19)  | 47.6   |
| (16-5-26-27)  | -40.4  | (16-5-26-29)  | -145.7 | (16-5-26-31)  | 111.8  |
| (18-5-26-16)  | -100.6 | (18-5-26-19)  | -53.0  | (18-5-26-27)  | -141.1 |
| (18-5-26-29)  | 113.7  | (18-5-26-31)  | 11.2   | (2-6-17-16)   | -1.9   |
| (2-6-17-21)   | 179.2  | (20-6-17-16)  | 179.2  | (20-6-17-21)  | 0.2    |
| (2-6-20-21)   | -178.5 | (2-6-20-24)   | 1.8    | (17-6-20-21)  | -0.3   |
| (17-6-20-24)  | 180.0  | (1-9-10-13)   | -43.3  | (2-9-10-13)   | -67.9  |
| (3-9-10-13)   | -5.3   | (4-9-10-13)   | -21.4  | (11-9-10-13)  | -169.3 |
| (12-9-10-13)  | 92.2   | (1-9-11-14)   | 121.5  | (2-9-11-14)   | 97.7   |
| (3-9-11-14)   | 71.9   | (4-9-11-14)   | 59.0   | (10-9-11-14)  | -137.7 |
| (12-9-11-14)  | -38.9  | (1-9-12-15)   | -28.3  | (2-9-12-15)   | 27.1   |
| (3-9-12-15)   | -21.1  | (4-9-12-15)   | 22.3   | (10-9-12-15)  | -128.9 |
| (11-9-12-15)  | 129.0  | (5-16-17-6)   | 1.6    | (5-16-17-21)  | 179.6  |
| (19-16-17-6)  | -177.8 | (19-16-17-21) | 0.1    | (26-16-17-6)  | 87.5   |
| (26-16-17-21) | -94.6  | (5-16-19-18)  | -1.5   | (5-16-19-23)  | -159.8 |
| (5-16-19-26)  | 66.8   | (17-16-19-18) | 178.0  | (17-16-19-23) | 19.7   |
| (17-16-19-26) | -113.7 | (26-16-19-18) | -68.3  | (26-16-19-23) | 133.4  |
| (5-16-26-18)  | -48.1  | (5-16-26-19)  | -101.6 | (5-16-26-27)  | 147.7  |
| (5-16-26-29)  | 42.2   | (5-16-26-31)  | -109.0 | (17-16-26-5)  | -112.8 |
| (17-16-26-18) | -160.9 | (17-16-26-19) | 145.6  | (17-16-26-27) | 34.9   |
| (17-16-26-29) | -70.6  | (17-16-26-31) | 138.3  | (19-16-26-5)  | 101.6  |
| (19-16-26-18) | 53.5   | (19-16-26-27) | -110.7 | (19-16-26-29) | 143.8  |
| (19-16-26-31) | -7.3   | (6-17-21-20)  | -0.3   | (6-17-21-25)  | 180.0  |
| (16-17-21-20) | -178.5 | (16-17-21-25) | 1.8    | (5-18-19-16)  | 1.5    |
| (5-18-19-23)  | 159.7  | (5-18-19-26)  | -76.6  | (22-18-19-16) | -160.1 |
| (22-18-19-23) | -1.9   | (22-18-19-26) | 121.8  | (26-18-19-16) | 78.1   |



|               |        |               |        |               |        |
|---------------|--------|---------------|--------|---------------|--------|
| (26-18-19-23) | -123.7 | (5-18-26-16)  | 45.8   | (5-18-26-19)  | 94.8   |
| (5-18-26-27)  | 76.6   | (5-18-26-29)  | -72.9  | (5-18-26-31)  | -172.0 |
| (19-18-26-5)  | -94.8  | (19-18-26-16) | -49.1  | (19-18-26-27) | -18.2  |
| (19-18-26-29) | -167.8 | (19-18-26-31) | 93.1   | (22-18-26-5)  | 135.7  |
| (22-18-26-16) | -178.5 | (22-18-26-19) | -129.5 | (22-18-26-27) | -147.7 |
| (22-18-26-29) | 62.8   | (22-18-26-31) | -36.3  | (16-19-26-5)  | -45.3  |
| (16-19-26-18) | -94.0  | (16-19-26-27) | 76.0   | (16-19-26-29) | -71.3  |
| (16-19-26-31) | 174.8  | (18-19-26-5)  | 48.7   | (18-19-26-16) | 94.0   |
| (18-19-26-27) | 170.1  | (18-19-26-29) | 22.8   | (18-19-26-31) | -91.1  |
| (23-19-26-5)  | 177.8  | (23-19-26-16) | -136.9 | (23-19-26-18) | 129.1  |
| (23-19-26-27) | -60.9  | (23-19-26-29) | 151.9  | (23-19-26-31) | 38.0   |
| (6-20-21-17)  | 0.2    | (6-20-21-25)  | 180.0  | (24-20-21-17) | 180.0  |
| (24-20-21-25) | -0.3   | (5-26-27-28)  | 121.5  | (16-26-27-28) | 97.7   |
| (18-26-27-28) | 71.9   | (19-26-27-28) | 59.0   | (29-26-27-28) | -137.7 |
| (31-26-27-28) | -38.9  | (5-26-29-30)  | -43.3  | (16-26-29-30) | -67.9  |
| (18-26-29-30) | -5.3   | (19-26-29-30) | -21.4  | (27-26-29-30) | -169.3 |
| (31-26-29-30) | 92.2   | (5-26-31-32)  | -28.3  | (16-26-31-32) | 27.1   |
| (18-26-31-32) | -21.1  | (19-26-31-32) | 22.3   | (27-26-31-32) | 129.0  |
| (29-26-31-32) | -128.9 |               |        |               |        |

Frequencies (cm<sup>-1</sup>):

|        |        |        |        |        |        |        |        |        |        |
|--------|--------|--------|--------|--------|--------|--------|--------|--------|--------|
| 5.4    | 17.7   | 39.1   | 41.9   | 56.4   | 64.2   | 78.0   | 79.4   |        |        |
| 84.6   | 86.7   | 101.6  | 103.9  | 119.2  | 132.1  | 135.4  | 142.6  | 186.7  | 238.1  |
| 298.8  | 316.8  | 333.3  | 369.6  | 387.8  | 395.5  | 412.3  | 412.6  | 440.8  | 448.6  |
| 448.7  | 459.3  | 464.1  | 466.1  | 487.3  | 497.2  | 502.4  | 502.7  | 512.1  | 512.4  |
| 529.6  | 542.2  | 574.2  | 580.5  | 588.9  | 591.7  | 596.3  | 601.3  | 609.4  | 620.3  |
| 628.4  | 639.9  | 675.3  | 711.1  | 773.6  | 775.1  | 792.9  | 795.3  | 866.4  | 896.0  |
| 941.1  | 951.8  | 955.7  | 1018.1 | 1057.0 | 1091.1 | 1124.2 | 1151.4 | 1164.2 | 1195.2 |
| 1232.5 | 1257.0 | 1272.2 | 1307.3 | 1329.9 | 1395.4 | 1540.5 | 1560.3 | 1584.1 | 1616.4 |
| 2085.1 | 2085.2 | 2086.7 | 2087.1 | 2120.4 | 2136.0 | 3250.4 | 3270.2 | 3270.2 | 3280.7 |
| 3284.9 | 3285.4 |        |        |        |        |        |        |        |        |

(7b) B3LYP/6-31G(d)+LANL2DZ C<sub>1</sub> Geometry

|                                         |                |          |
|-----------------------------------------|----------------|----------|
| Nuclear repulsion energy                | 2673.15051807  | Hartrees |
| B3LYP/6-31G(d)+LANL2DZ energy           | -1387.57494266 | Hartrees |
| Zero-point energy correction            | 0.184073       | Hartrees |
| Thermal correction to Enthalpy          | 0.209903       | Hartrees |
| Thermal correction to Gibbs Free Energy | 0.127739       | Hartrees |

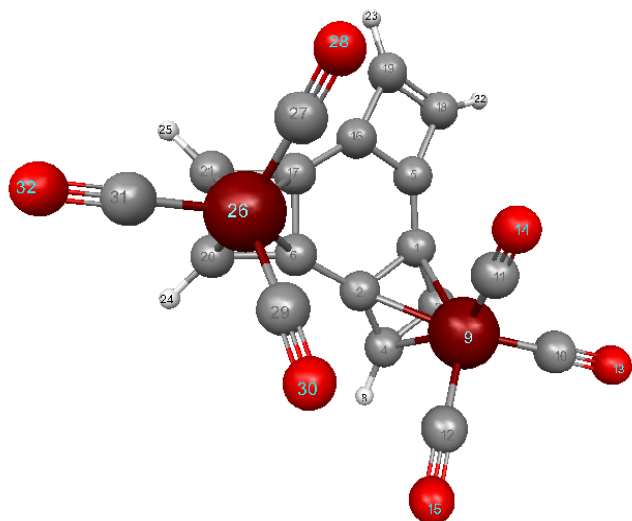

|     | X         | Y         | Z         |
|-----|-----------|-----------|-----------|
| C1  | 1.488262  | 1.413837  | -0.733369 |
| C2  | 0.748840  | 0.256888  | -1.302157 |
| C3  | 2.688713  | 0.975798  | -1.438180 |
| C4  | 1.958873  | -0.121546 | -2.035613 |
| C5  | 0.774436  | 2.471556  | -0.142367 |
| C6  | -0.686522 | 0.309541  | -1.325148 |
| H7  | 3.674849  | 1.392660  | -1.587590 |
| H8  | 2.184301  | -0.841308 | -2.810239 |
| Fe9 | 2.248803  | -0.448657 | -0.023192 |
| C10 | 3.913361  | -0.317090 | 0.590807  |
| C11 | 1.443542  | -0.396856 | 1.570799  |
| C12 | 2.199692  | -2.213957 | -0.278518 |
| O13 | 4.995919  | -0.241321 | 0.981126  |
| O14 | 0.893695  | -0.344086 | 2.580349  |
| O15 | 2.213788  | -3.351569 | -0.455813 |
| C16 | -0.610432 | 2.488947  | -0.127987 |
| C17 | -1.361718 | 1.471034  | -0.741266 |
| C18 | 0.783139  | 3.902492  | 0.450157  |
| C19 | -0.560844 | 3.921327  | 0.464324  |

|      |           |           |           |
|------|-----------|-----------|-----------|
| C20  | -1.926432 | -0.081236 | -1.989741 |
| C21  | -2.622020 | 1.051298  | -1.352549 |
| H22  | 1.561914  | 4.597928  | 0.735837  |
| H23  | -1.311452 | 4.641497  | 0.764724  |
| H24  | -2.158556 | -0.738616 | -2.815642 |
| H25  | -3.556816 | 1.557787  | -1.546439 |
| Fe26 | -2.268506 | -0.419494 | -0.027016 |
| C27  | -2.463021 | 0.234113  | 1.634139  |
| O28  | -2.614401 | 0.662280  | 2.692806  |
| C29  | -1.414245 | -1.946150 | 0.342412  |
| O30  | -0.866127 | -2.939549 | 0.546090  |
| C31  | -3.892206 | -1.099979 | -0.189502 |
| O32  | -4.954183 | -1.530522 | -0.321145 |

|            |        |            |        |            |        |            |       |         |       |
|------------|--------|------------|--------|------------|--------|------------|-------|---------|-------|
| (1-2)      | 1.486  | (1-3)      | 1.459  | (1-5)      | 1.406  | (1-9)      | 2.133 | (2-4)   | 1.465 |
| (2-6)      | 1.437  | (2-9)      | 2.094  | (3-4)      | 1.447  | (3-7)      | 1.081 | (3-9)   | 2.055 |
| (4-8)      | 1.081  | (4-9)      | 2.059  | (5-16)     | 1.385  | (5-18)     | 1.549 | (6-17)  | 1.465 |
| (6-20)     | 1.460  | (6-26)     | 2.172  | (9-10)     | 1.779  | (9-11)     | 1.787 | (9-12)  | 1.784 |
| (10-13)    | 1.153  | (11-14)    | 1.151  | (12-15)    | 1.151  | (16-17)    | 1.406 | (16-19) | 1.551 |
| (17-21)    | 1.462  | (17-26)    | 2.215  | (18-19)    | 1.344  | (18-22)    | 1.082 | (19-23) | 1.083 |
| (20-21)    | 1.474  | (20-24)    | 1.081  | (20-26)    | 2.021  | (21-25)    | 1.081 | (21-26) | 2.011 |
| (26-27)    | 1.796  | (26-29)    | 1.788  | (26-31)    | 1.768  | (27-28)    | 1.152 | (29-30) | 1.153 |
| (31-32)    | 1.153  |            |        |            |        |            |       |         |       |
| (2-1-3)    | 89.5   | (2-1-5)    | 119.6  | (2-1-9)    | 68.0   | (3-1-5)    | 147.8 |         |       |
| (3-1-9)    | 66.8   | (5-1-9)    | 134.2  | (1-2-4)    | 89.0   | (1-2-6)    | 118.3 |         |       |
| (1-2-9)    | 70.9   | (4-2-6)    | 145.8  | (4-2-9)    | 68.1   | (6-2-9)    | 137.6 |         |       |
| (1-3-4)    | 90.7   | (1-3-7)    | 134.5  | (1-3-9)    | 72.5   | (4-3-7)    | 134.1 |         |       |
| (4-3-9)    | 69.6   | (7-3-9)    | 123.9  | (2-4-3)    | 90.8   | (2-4-8)    | 134.7 |         |       |
| (2-4-9)    | 70.6   | (3-4-8)    | 134.1  | (3-4-9)    | 69.3   | (8-4-9)    | 124.4 |         |       |
| (1-5-16)   | 121.4  | (1-5-18)   | 148.5  | (16-5-18)  | 89.4   | (2-6-17)   | 118.9 |         |       |
| (2-6-20)   | 147.8  | (2-6-26)   | 134.9  | (17-6-20)  | 90.1   | (17-6-26)  | 72.1  |         |       |
| (20-6-26)  | 64.1   | (1-9-2)    | 41.2   | (1-9-3)    | 40.7   | (1-9-4)    | 59.1  |         |       |
| (1-9-10)   | 112.6  | (1-9-11)   | 96.4   | (1-9-12)   | 143.7  | (2-9-3)    | 60.0  |         |       |
| (2-9-4)    | 41.3   | (2-9-10)   | 148.9  | (2-9-11)   | 102.3  | (2-9-12)   | 103.1 |         |       |
| (3-9-4)    | 41.2   | (3-9-10)   | 89.2   | (3-9-11)   | 133.7  | (3-9-12)   | 126.4 |         |       |
| (4-9-10)   | 117.2  | (4-9-11)   | 143.5  | (4-9-12)   | 90.8   | (10-9-11)  | 96.4  |         |       |
| (10-9-12)  | 98.5   | (11-9-12)  | 98.3   | (9-10-13)  | 179.4  | (9-11-14)  | 178.0 |         |       |
| (9-12-15)  | 177.6  | (5-16-17)  | 121.4  | (5-16-19)  | 89.1   | (17-16-19) | 148.5 |         |       |
| (6-17-16)  | 120.1  | (6-17-21)  | 90.2   | (6-17-26)  | 68.9   | (16-17-21) | 148.3 |         |       |
| (16-17-26) | 134.1  | (21-17-26) | 62.4   | (5-18-19)  | 90.7   | (5-18-22)  | 134.3 |         |       |
| (19-18-22) | 135.0  | (16-19-18) | 90.9   | (16-19-23) | 134.3  | (18-19-23) | 134.9 |         |       |
| (6-20-21)  | 89.9   | (6-20-24)  | 133.9  | (6-20-26)  | 75.3   | (21-20-24) | 134.1 |         |       |
| (21-20-26) | 68.2   | (24-20-26) | 127.2  | (17-21-20) | 89.7   | (17-21-25) | 133.3 |         |       |
| (17-21-26) | 77.5   | (20-21-25) | 133.7  | (20-21-26) | 68.9   | (25-21-26) | 127.8 |         |       |
| (6-26-17)  | 39.0   | (6-26-20)  | 40.6   | (6-26-21)  | 59.3   | (6-26-27)  | 120.6 |         |       |
| (6-26-29)  | 93.6   | (6-26-31)  | 138.0  | (17-26-20) | 58.3   | (17-26-21) | 40.1  |         |       |
| (17-26-27) | 91.8   | (17-26-29) | 126.9  | (17-26-31) | 132.4  | (20-26-21) | 42.9  |         |       |
| (20-26-27) | 148.9  | (20-26-29) | 105.2  | (20-26-31) | 97.5   | (21-26-27) | 108.9 |         |       |
| (21-26-29) | 147.6  | (21-26-31) | 93.4   | (27-26-29) | 99.9   | (27-26-31) | 97.2  |         |       |
| (29-26-31) | 97.4   | (26-27-28) | 178.6  | (26-29-30) | 178.2  | (26-31-32) | 178.6 |         |       |
| (3-1-2-4)  | -2.1   | (3-1-2-6)  | -160.5 | (3-1-2-9)  | 65.1   |            |       |         |       |
| (5-1-2-4)  | 163.4  | (5-1-2-6)  | 5.0    | (5-1-2-9)  | -129.5 |            |       |         |       |
| (9-1-2-4)  | -67.1  | (9-1-2-6)  | 134.5  | (2-1-3-4)  | 2.1    |            |       |         |       |
| (2-1-3-7)  | 173.1  | (2-1-3-9)  | -66.2  | (5-1-3-4)  | -153.7 |            |       |         |       |
| (5-1-3-7)  | 17.3   | (5-1-3-9)  | 138.0  | (9-1-3-4)  | 68.3   |            |       |         |       |
| (9-1-3-7)  | -120.7 | (2-1-5-16) | -2.8   | (2-1-5-18) | -170.1 |            |       |         |       |
| (3-1-5-16) | 149.1  | (3-1-5-18) | -18.2  | (9-1-5-16) | -90.0  |            |       |         |       |
| (9-1-5-18) | 102.7  | (2-1-9-3)  | 99.4   | (2-1-9-4)  | 49.8   |            |       |         |       |
| (2-1-9-10) | 159.0  | (2-1-9-11) | -101.4 | (2-1-9-12) | 12.0   |            |       |         |       |
| (3-1-9-2)  | -99.4  | (3-1-9-4)  | -49.6  | (3-1-9-10) | 59.6   |            |       |         |       |
| (3-1-9-11) | 159.3  | (3-1-9-12) | -87.3  | (5-1-9-2)  | 110.5  |            |       |         |       |

|               |        |               |        |               |        |
|---------------|--------|---------------|--------|---------------|--------|
| (5-1-9-3)     | -150.2 | (5-1-9-4)     | 160.3  | (5-1-9-10)    | -90.6  |
| (5-1-9-11)    | 9.1    | (5-1-9-12)    | 122.5  | (1-2-4-3)     | 2.1    |
| (1-2-4-8)     | -170.6 | (1-2-4-9)     | 69.7   | (6-2-4-3)     | 146.9  |
| (6-2-4-8)     | -25.8  | (6-2-4-9)     | -145.4 | (9-2-4-3)     | -67.6  |
| (9-2-4-8)     | 119.6  | (1-2-6-17)    | -2.4   | (1-2-6-20)    | 149.3  |
| (1-2-6-26)    | -95.5  | (4-2-6-17)    | -141.6 | (4-2-6-20)    | 10.1   |
| (4-2-6-26)    | 125.4  | (9-2-6-17)    | 89.7   | (9-2-6-20)    | -118.5 |
| (9-2-6-26)    | -3.3   | (1-2-9-3)     | -48.0  | (1-2-9-4)     | -96.8  |
| (1-2-9-10)    | -39.9  | (1-2-9-11)    | 85.6   | (1-2-9-12)    | -172.7 |
| (4-2-9-1)     | 96.8   | (4-2-9-3)     | 48.8   | (4-2-9-10)    | 56.9   |
| (4-2-9-11)    | -177.5 | (4-2-9-12)    | -75.9  | (6-2-9-1)     | -111.4 |
| (6-2-9-3)     | -159.5 | (6-2-9-4)     | 151.8  | (6-2-9-10)    | -151.3 |
| (6-2-9-11)    | -25.8  | (6-2-9-12)    | 75.9   | (1-3-4-2)     | -2.1   |
| (1-3-4-8)     | 170.7  | (1-3-4-9)     | -71.0  | (7-3-4-2)     | -173.3 |
| (7-3-4-8)     | -0.5   | (7-3-4-9)     | 117.9  | (9-3-4-2)     | 68.9   |
| (9-3-4-8)     | -118.3 | (1-3-9-2)     | 48.6   | (1-3-9-4)     | 97.5   |
| (1-3-9-10)    | -127.2 | (1-3-9-11)    | -29.1  | (1-3-9-12)    | 132.8  |
| (4-3-9-1)     | -97.5  | (4-3-9-2)     | -48.9  | (4-3-9-10)    | 135.3  |
| (4-3-9-11)    | -126.6 | (4-3-9-12)    | 35.3   | (7-3-9-1)     | 132.4  |
| (7-3-9-2)     | -179.0 | (7-3-9-4)     | -130.1 | (7-3-9-10)    | 5.2    |
| (7-3-9-11)    | 103.3  | (7-3-9-12)    | -94.8  | (2-4-9-1)     | -49.6  |
| (2-4-9-3)     | -98.6  | (2-4-9-10)    | -150.9 | (2-4-9-11)    | 4.0    |
| (2-4-9-12)    | 109.1  | (3-4-9-1)     | 48.9   | (3-4-9-2)     | 98.6   |
| (3-4-9-10)    | -52.3  | (3-4-9-11)    | 102.6  | (3-4-9-12)    | -152.3 |
| (8-4-9-1)     | 178.9  | (8-4-9-2)     | -131.5 | (8-4-9-3)     | 130.0  |
| (8-4-9-10)    | 77.6   | (8-4-9-11)    | -127.4 | (8-4-9-12)    | -22.4  |
| (1-5-16-17)   | -2.1   | (1-5-16-19)   | -173.4 | (18-5-16-17)  | 171.3  |
| (18-5-16-19)  | 0.0    | (1-5-18-19)   | 169.2  | (1-5-18-22)   | -10.9  |
| (16-5-18-19)  | 0.0    | (16-5-18-22)  | 179.9  | (2-6-17-16)   | -2.3   |
| (2-6-17-21)   | 167.9  | (2-6-17-26)   | -132.0 | (20-6-17-16)  | -167.6 |
| (20-6-17-21)  | 2.5    | (20-6-17-26)  | 62.7   | (26-6-17-16)  | 129.7  |
| (26-6-17-21)  | -60.2  | (2-6-20-21)   | -158.0 | (2-6-20-24)   | 6.7    |
| (2-6-20-26)   | 134.6  | (17-6-20-21)  | -2.5   | (17-6-20-24)  | 162.2  |
| (17-6-20-26)  | -69.9  | (26-6-20-21)  | 67.5   | (26-6-20-24)  | -127.9 |
| (2-6-26-17)   | 113.2  | (2-6-26-20)   | -147.6 | (2-6-26-21)   | 160.5  |
| (2-6-26-27)   | 65.5   | (2-6-26-29)   | -38.2  | (2-6-26-31)   | -143.4 |
| (17-6-26-20)  | 99.2   | (17-6-26-21)  | 47.2   | (17-6-26-27)  | -47.8  |
| (17-6-26-29)  | -151.4 | (17-6-26-31)  | 103.4  | (20-6-26-17)  | -99.2  |
| (20-6-26-21)  | -52.0  | (20-6-26-27)  | -146.9 | (20-6-26-29)  | 109.4  |
| (20-6-26-31)  | 4.2    | (1-9-10-13)   | -126.7 | (2-9-10-13)   | -99.5  |
| (3-9-10-13)   | -92.4  | (4-9-10-13)   | -61.0  | (11-9-10-13)  | 133.7  |
| (12-9-10-13)  | 34.3   | (1-9-11-14)   | 33.2   | (2-9-11-14)   | -8.1   |
| (3-9-11-14)   | 51.8   | (4-9-11-14)   | -10.8  | (10-9-11-14)  | 146.9  |
| (12-9-11-14)  | -113.5 | (1-9-12-15)   | 114.4  | (2-9-12-15)   | 122.5  |
| (3-9-12-15)   | 60.4   | (4-9-12-15)   | 82.7   | (10-9-12-15)  | -35.0  |
| (11-9-12-15)  | -132.8 | (5-16-17-6)   | 4.7    | (5-16-17-21)  | -156.3 |
| (5-16-17-26)  | 93.7   | (19-16-17-6)  | 167.9  | (19-16-17-21) | 6.9    |
| (19-16-17-26) | -103.1 | (5-16-19-18)  | 0.0    | (5-16-19-23)  | 179.9  |
| (17-16-19-18) | -165.8 | (17-16-19-23) | 14.2   | (6-17-21-20)  | -2.5   |
| (6-17-21-25)  | -163.2 | (6-17-21-26)  | 66.0   | (16-17-21-20) | 161.1  |
| (16-17-21-25) | 0.4    | (16-17-21-26) | -130.4 | (26-17-21-20) | -68.4  |
| (26-17-21-25) | 130.8  | (6-17-26-20)  | -49.0  | (6-17-26-21)  | -101.8 |
| (6-17-26-27)  | 140.4  | (6-17-26-29)  | 36.6   | (6-17-26-31)  | -118.1 |
| (16-17-26-6)  | -112.0 | (16-17-26-20) | -161.0 | (16-17-26-21) | 146.1  |
| (16-17-26-27) | 28.4   | (16-17-26-29) | -75.4  | (16-17-26-31) | 129.9  |
| (21-17-26-6)  | 101.8  | (21-17-26-20) | 52.9   | (21-17-26-27) | -117.8 |
| (21-17-26-29) | 138.5  | (21-17-26-31) | -16.2  | (5-18-19-16)  | 0.0    |
| (5-18-19-23)  | -179.9 | (22-18-19-16) | -179.9 | (22-18-19-23) | 0.2    |
| (6-20-21-17)  | 2.5    | (6-20-21-25)  | 163.1  | (6-20-21-26)  | -74.2  |
| (24-20-21-17) | -162.1 | (24-20-21-25) | -1.5   | (24-20-21-26) | 121.2  |
| (26-20-21-17) | 76.7   | (26-20-21-25) | -122.7 | (6-20-26-17)  | 46.9   |
| (6-20-26-21)  | 95.9   | (6-20-26-27)  | 65.2   | (6-20-26-29)  | -77.3  |

|               |        |               |        |               |        |
|---------------|--------|---------------|--------|---------------|--------|
| (6-20-26-31)  | -177.2 | (21-20-26-6)  | -95.9  | (21-20-26-17) | -49.0  |
| (21-20-26-27) | -30.7  | (21-20-26-29) | -173.2 | (21-20-26-31) | 86.9   |
| (24-20-26-6)  | 134.4  | (24-20-26-17) | -178.7 | (24-20-26-21) | -129.6 |
| (24-20-26-27) | -160.3 | (24-20-26-29) | 57.1   | (24-20-26-31) | -42.7  |
| (17-21-26-6)  | -45.8  | (17-21-26-20) | -94.6  | (17-21-26-27) | 69.2   |
| (17-21-26-29) | -82.3  | (17-21-26-31) | 168.1  | (20-21-26-6)  | 48.8   |
| (20-21-26-17) | 94.6   | (20-21-26-27) | 163.8  | (20-21-26-29) | 12.2   |
| (20-21-26-31) | -97.4  | (25-21-26-6)  | 178.4  | (25-21-26-17) | -135.8 |
| (25-21-26-20) | 129.6  | (25-21-26-27) | -66.6  | (25-21-26-29) | 141.9  |
| (25-21-26-31) | 32.3   | (6-26-27-28)  | 119.9  | (17-26-27-28) | 92.1   |
| (20-26-27-28) | 76.6   | (21-26-27-28) | 55.1   | (29-26-27-28) | -139.9 |
| (31-26-27-28) | -41.1  | (6-26-29-30)  | -64.1  | (17-26-29-30) | -86.2  |
| (20-26-29-30) | -24.7  | (21-26-29-30) | -33.3  | (27-26-29-30) | 173.9  |
| (31-26-29-30) | 75.2   | (6-26-31-32)  | -25.1  | (17-26-31-32) | 31.0   |
| (20-26-31-32) | -22.3  | (21-26-31-32) | 20.6   | (27-26-31-32) | 130.2  |
| (29-26-31-32) | -128.8 |               |        |               |        |

| Frequencies (cm <sup>-1</sup> ): | 15.8   | 32.6   | 45.0   | 53.8   | 64.0   | 72.5   | 82.4   | 86.1   |        |        |
|----------------------------------|--------|--------|--------|--------|--------|--------|--------|--------|--------|--------|
|                                  | 93.4   | 96.9   | 107.8  | 109.8  | 127.4  | 129.3  | 137.1  | 183.9  | 200.7  | 218.9  |
|                                  | 246.7  | 310.8  | 340.7  | 359.4  | 374.6  | 384.4  | 406.1  | 411.2  | 421.1  | 444.7  |
|                                  | 451.9  | 453.7  | 462.2  | 467.5  | 497.6  | 500.9  | 503.5  | 509.1  | 512.8  | 515.1  |
|                                  | 524.4  | 537.9  | 566.5  | 582.4  | 592.2  | 596.3  | 601.3  | 601.6  | 612.8  | 616.8  |
|                                  | 627.0  | 640.6  | 658.8  | 696.2  | 763.0  | 784.9  | 804.3  | 816.8  | 860.0  | 889.4  |
|                                  | 935.5  | 954.4  | 969.6  | 1016.3 | 1056.6 | 1088.3 | 1121.8 | 1142.5 | 1167.9 | 1179.0 |
|                                  | 1241.2 | 1253.7 | 1287.9 | 1323.1 | 1333.0 | 1417.9 | 1528.1 | 1549.3 | 1575.7 | 1621.1 |
|                                  | 2073.4 | 2079.6 | 2087.0 | 2096.7 | 2108.6 | 2139.9 | 3248.3 | 3271.7 | 3271.8 | 3279.4 |
|                                  | 3286.4 | 3288.5 |        |        |        |        |        |        |        |        |

(8a) B3LYP/6-31G(d)+LANL2DZ C<sub>1</sub> Geometry

|                                         |                         |
|-----------------------------------------|-------------------------|
| Nuclear repulsion energy                | 4118.93384044 Hartrees  |
| B3LYP/6-31G(d)+LANL2DZ energy           | -1851.11551388 Hartrees |
| Zero-point energy correction            | 0.213182 Hartrees       |
| Thermal correction to Enthalpy          | 0.246603 Hartrees       |
| Thermal correction to Gibbs Free Energy | 0.146181 Hartrees       |

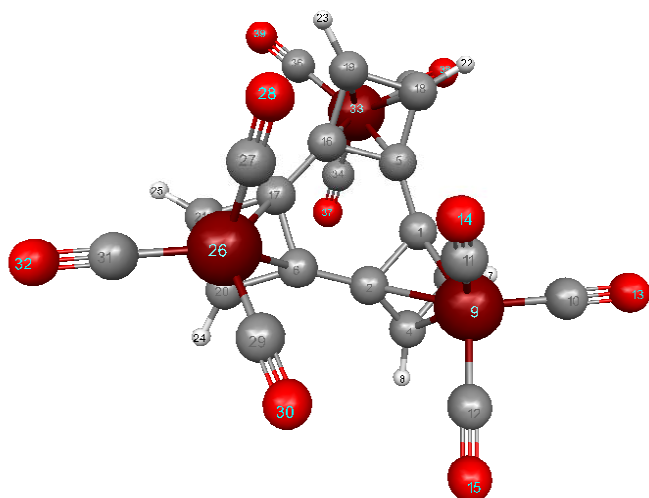

|     | X         | Y         | Z         |
|-----|-----------|-----------|-----------|
| C1  | 0.322718  | -1.477465 | -0.294388 |
| C2  | -0.671778 | -0.732115 | -1.107494 |
| C3  | 0.158130  | -2.620628 | -1.184589 |
| C4  | -0.810798 | -1.902967 | -1.965995 |
| C5  | 1.261349  | -0.734462 | 0.519285  |
| C6  | -0.659640 | 0.717171  | -1.127241 |
| H7  | 0.622806  | -3.594234 | -1.265329 |
| H8  | -1.367175 | -2.122989 | -2.867299 |
| Fe9 | -1.540730 | -2.270368 | -0.042923 |
| C10 | -1.404911 | -3.908102 | 0.653061  |
| C11 | -1.915718 | -1.417706 | 1.472330  |
| C12 | -3.208250 | -2.414559 | -0.675333 |
| O13 | -1.308559 | -4.961604 | 1.109931  |
| O14 | -2.130202 | -0.855929 | 2.454078  |
| O15 | -4.277288 | -2.501198 | -1.092854 |
| C16 | 1.270756  | 0.748342  | 0.485667  |
| C17 | 0.337107  | 1.460410  | -0.358255 |
| C18 | 2.058368  | -0.692446 | 1.732367  |
| C19 | 2.068703  | 0.747675  | 1.709368  |
| C20 | -0.917519 | 1.909999  | -1.933736 |
| C21 | 0.088518  | 2.639591  | -1.161683 |
| H22 | 2.445388  | -1.438232 | 2.413615  |
| H23 | 2.439035  | 1.511174  | 2.379218  |

|      |           |           |           |
|------|-----------|-----------|-----------|
| H24  | -1.452092 | 2.102919  | -2.852755 |
| H25  | 0.564490  | 3.605513  | -1.254258 |
| Fe26 | -1.584245 | 2.255933  | -0.041472 |
| C27  | -1.305546 | 2.280118  | 1.722546  |
| O28  | -1.094350 | 2.306656  | 2.855055  |
| C29  | -3.171571 | 1.448143  | -0.071110 |
| O30  | -4.189672 | 0.910949  | -0.125471 |
| C31  | -2.157938 | 3.932676  | -0.208059 |
| O32  | -2.520718 | 5.018576  | -0.340424 |
| Fe33 | 3.132076  | 0.016830  | 0.085843  |
| C34  | 2.986463  | -0.169446 | -1.679054 |
| C35  | 4.381000  | -1.232104 | 0.353738  |
| C36  | 4.200558  | 1.446266  | 0.107730  |
| O37  | 2.856992  | -0.288472 | -2.817165 |
| O38  | 5.177572  | -2.046764 | 0.524380  |
| O39  | 4.874087  | 2.380689  | 0.116750  |

|            |       |            |       |            |       |            |       |         |       |
|------------|-------|------------|-------|------------|-------|------------|-------|---------|-------|
| (1-2)      | 1.485 | (1-3)      | 1.458 | (1-5)      | 1.447 | (1-9)      | 2.041 | (2-4)   | 1.459 |
| (2-6)      | 1.449 | (2-9)      | 2.063 | (3-4)      | 1.437 | (3-7)      | 1.082 | (3-9)   | 2.077 |
| (4-8)      | 1.082 | (4-9)      | 2.089 | (5-16)     | 1.483 | (5-18)     | 1.452 | (5-33)  | 2.062 |
| (6-17)     | 1.462 | (6-20)     | 1.463 | (6-26)     | 2.098 | (9-10)     | 1.785 | (9-11)  | 1.779 |
| (9-12)     | 1.789 | (10-13)    | 1.152 | (11-14)    | 1.151 | (12-15)    | 1.151 | (16-17) | 1.446 |
| (16-19)    | 1.461 | (16-33)    | 2.039 | (17-21)    | 1.448 | (17-26)    | 2.104 | (18-19) | 1.440 |
| (18-22)    | 1.082 | (18-33)    | 2.090 | (19-23)    | 1.081 | (19-33)    | 2.074 | (20-21) | 1.463 |
| (20-24)    | 1.081 | (20-26)    | 2.036 | (21-25)    | 1.081 | (21-26)    | 2.049 | (26-27) | 1.786 |
| (26-29)    | 1.781 | (26-31)    | 1.780 | (27-28)    | 1.152 | (29-30)    | 1.152 | (31-32) | 1.153 |
| (33-34)    | 1.781 | (33-35)    | 1.786 | (33-36)    | 1.785 | (34-37)    | 1.152 | (35-38) | 1.152 |
| (36-39)    | 1.152 |            |       |            |       |            |       |         |       |
| (2-1-3)    | 89.1  | (2-1-5)    | 119.0 | (2-1-9)    | 69.6  | (3-1-5)    | 145.0 |         |       |
| (3-1-9)    | 70.6  | (5-1-9)    | 136.2 | (1-2-4)    | 89.0  | (1-2-6)    | 120.2 |         |       |
| (1-2-9)    | 68.0  | (4-2-6)    | 142.7 | (4-2-9)    | 70.4  | (6-2-9)    | 139.1 |         |       |
| (1-3-4)    | 90.9  | (1-3-7)    | 134.6 | (1-3-9)    | 67.9  | (4-3-7)    | 134.3 |         |       |
| (4-3-9)    | 70.3  | (7-3-9)    | 123.0 | (2-4-3)    | 90.9  | (2-4-8)    | 134.6 |         |       |
| (2-4-9)    | 68.5  | (3-4-8)    | 134.3 | (3-4-9)    | 69.3  | (8-4-9)    | 123.5 |         |       |
| (1-5-16)   | 120.3 | (1-5-18)   | 147.2 | (1-5-33)   | 131.1 | (16-5-18)  | 89.2  |         |       |
| (16-5-33)  | 68.0  | (18-5-33)  | 70.6  | (2-6-17)   | 120.5 | (2-6-20)   | 145.2 |         |       |
| (2-6-26)   | 136.3 | (17-6-20)  | 89.7  | (17-6-26)  | 69.8  | (20-6-26)  | 67.0  |         |       |
| (1-9-2)    | 42.4  | (1-9-3)    | 41.5  | (1-9-4)    | 60.0  | (1-9-10)   | 109.6 |         |       |
| (1-9-11)   | 96.4  | (1-9-12)   | 147.0 | (2-9-3)    | 59.8  | (2-9-4)    | 41.1  |         |       |
| (2-9-10)   | 148.6 | (2-9-11)   | 99.8  | (2-9-12)   | 105.7 | (3-9-4)    | 40.3  |         |       |
| (3-9-10)   | 89.8  | (3-9-11)   | 136.2 | (3-9-12)   | 123.7 | (4-9-10)   | 119.6 |         |       |
| (4-9-11)   | 140.7 | (4-9-12)   | 90.8  | (10-9-11)  | 97.1  | (10-9-12)  | 97.7  |         |       |
| (11-9-12)  | 98.2  | (9-10-13)  | 179.4 | (9-11-14)  | 178.5 | (9-12-15)  | 179.4 |         |       |
| (5-16-17)  | 120.1 | (5-16-19)  | 89.1  | (5-16-33)  | 69.6  | (17-16-19) | 147.3 |         |       |
| (17-16-33) | 130.7 | (19-16-33) | 70.5  | (6-17-16)  | 119.8 | (6-17-21)  | 90.3  |         |       |
| (6-17-26)  | 69.4  | (16-17-21) | 146.7 | (16-17-26) | 133.5 | (21-17-26) | 67.6  |         |       |
| (5-18-19)  | 91.1  | (5-18-22)  | 134.6 | (5-18-33)  | 68.5  | (19-18-22) | 134.2 |         |       |
| (19-18-33) | 69.2  | (22-18-33) | 123.1 | (16-19-18) | 90.6  | (16-19-23) | 134.9 |         |       |
| (16-19-33) | 67.9  | (18-19-23) | 134.3 | (18-19-33) | 70.4  | (23-19-33) | 123.9 |         |       |
| (6-20-21)  | 89.7  | (6-20-24)  | 134.6 | (6-20-26)  | 71.6  | (21-20-24) | 134.4 |         |       |
| (21-20-26) | 69.5  | (24-20-26) | 126.7 | (17-21-20) | 90.3  | (17-21-25) | 134.4 |         |       |
| (17-21-26) | 71.6  | (20-21-25) | 134.7 | (20-21-26) | 68.5  | (25-21-26) | 125.0 |         |       |
| (6-26-17)  | 40.7  | (6-26-20)  | 41.4  | (6-26-21)  | 59.6  | (6-26-27)  | 116.9 |         |       |
| (6-26-29)  | 93.0  | (6-26-31)  | 141.7 | (17-26-20) | 59.8  | (17-26-21) | 40.8  |         |       |
| (17-26-27) | 90.6  | (17-26-29) | 129.8 | (17-26-31) | 129.5 | (20-26-21) | 42.0  |         |       |
| (20-26-27) | 150.4 | (20-26-29) | 101.5 | (20-26-31) | 100.3 | (21-26-27) | 114.2 |         |       |
| (21-26-29) | 143.4 | (21-26-31) | 92.0  | (27-26-29) | 99.3  | (27-26-31) | 97.5  |         |       |
| (29-26-31) | 98.0  | (26-27-28) | 178.3 | (26-29-30) | 178.1 | (26-31-32) | 178.7 |         |       |
| (5-33-16)  | 42.4  | (5-33-18)  | 40.9  | (5-33-19)  | 59.9  | (5-33-34)  | 95.5  |         |       |
| (5-33-35)  | 110.4 | (5-33-36)  | 146.3 | (16-33-18) | 59.9  | (16-33-19) | 41.6  |         |       |
| (16-33-34) | 99.0  | (16-33-35) | 149.2 | (16-33-36) | 104.9 | (18-33-19) | 40.5  |         |       |

|              |        |              |        |              |        |            |       |
|--------------|--------|--------------|--------|--------------|--------|------------|-------|
| (18-33-34)   | 134.7  | (18-33-35)   | 90.2   | (18-33-36)   | 124.7  | (19-33-34) | 140.4 |
| (19-33-35)   | 119.2  | (19-33-36)   | 90.9   | (34-33-35)   | 97.6   | (34-33-36) | 98.3  |
| (35-33-36)   | 98.0   | (33-34-37)   | 178.2  | (33-35-38)   | 179.4  | (33-36-39) | 179.0 |
| (3-1-2-4)    | 0.4    | (3-1-2-6)    | -155.3 | (3-1-2-9)    | 69.6   |            |       |
| (5-1-2-4)    | 158.3  | (5-1-2-6)    | 2.7    | (5-1-2-9)    | -132.4 |            |       |
| (9-1-2-4)    | -69.2  | (9-1-2-6)    | 135.1  | (2-1-3-4)    | -0.4   |            |       |
| (2-1-3-7)    | 176.2  | (2-1-3-9)    | -68.6  | (5-1-3-4)    | -145.5 |            |       |
| (5-1-3-7)    | 31.1   | (5-1-3-9)    | 146.2  | (9-1-3-4)    | 68.3   |            |       |
| (9-1-3-7)    | -115.2 | (2-1-5-16)   | -3.0   | (2-1-5-18)   | 148.3  |            |       |
| (2-1-5-33)   | -89.2  | (3-1-5-16)   | 136.2  | (3-1-5-18)   | -72.5  |            |       |
| (3-1-5-33)   | 50.0   | (9-1-5-16)   | -93.1  | (9-1-5-18)   | 58.2   |            |       |
| (9-1-5-33)   | -179.3 | (2-1-9-3)    | 96.5   | (2-1-9-4)    | 48.9   |            |       |
| (2-1-9-10)   | 162.5  | (2-1-9-11)   | -97.6  | (2-1-9-12)   | 18.3   |            |       |
| (3-1-9-2)    | -96.5  | (3-1-9-4)    | -47.5  | (3-1-9-10)   | 66.0   |            |       |
| (3-1-9-11)   | 165.9  | (3-1-9-12)   | -78.2  | (5-1-9-2)    | 111.0  |            |       |
| (5-1-9-3)    | -152.5 | (5-1-9-4)    | 159.9  | (5-1-9-10)   | -86.5  |            |       |
| (5-1-9-11)   | 13.4   | (5-1-9-12)   | 129.3  | (1-2-4-3)    | -0.4   |            |       |
| (1-2-4-8)    | -176.8 | (1-2-4-9)    | 66.9   | (6-2-4-3)    | 143.6  |            |       |
| (6-2-4-8)    | -32.7  | (6-2-4-9)    | -149.1 | (9-2-4-3)    | -67.3  |            |       |
| (9-2-4-8)    | 116.3  | (1-2-6-17)   | 0.6    | (1-2-6-20)   | 147.5  |            |       |
| (1-2-6-26)   | -91.5  | (4-2-6-17)   | -136.6 | (4-2-6-20)   | 10.3   |            |       |
| (4-2-6-26)   | 131.3  | (9-2-6-17)   | 91.2   | (9-2-6-20)   | -121.9 |            |       |
| (9-2-6-26)   | -0.9   | (1-2-9-3)    | -49.6  | (1-2-9-4)    | -97.2  |            |       |
| (1-2-9-10)   | -33.0  | (1-2-9-11)   | 88.7   | (1-2-9-12)   | -169.8 |            |       |
| (4-2-9-1)    | 97.2   | (4-2-9-3)    | 47.6   | (4-2-9-10)   | 64.2   |            |       |
| (4-2-9-11)   | -174.1 | (4-2-9-12)   | -72.6  | (6-2-9-1)    | -111.3 |            |       |
| (6-2-9-3)    | -160.9 | (6-2-9-4)    | 151.6  | (6-2-9-10)   | -144.3 |            |       |
| (6-2-9-11)   | -22.6  | (6-2-9-12)   | 78.9   | (1-3-4-2)    | 0.4    |            |       |
| (1-3-4-8)    | 176.8  | (1-3-4-9)    | -66.1  | (7-3-4-2)    | -176.2 |            |       |
| (7-3-4-8)    | 0.2    | (7-3-4-9)    | 117.3  | (9-3-4-2)    | 66.5   |            |       |
| (9-3-4-8)    | -117.1 | (1-3-9-2)    | 50.9   | (1-3-9-4)    | 99.4   |            |       |
| (1-3-9-10)   | -120.6 | (1-3-9-11)   | -20.5  | (1-3-9-12)   | 140.2  |            |       |
| (4-3-9-1)    | -99.4  | (4-3-9-2)    | -48.6  | (4-3-9-10)   | 140.0  |            |       |
| (4-3-9-11)   | -119.9 | (4-3-9-12)   | 40.7   | (7-3-9-1)    | 129.9  |            |       |
| (7-3-9-2)    | -179.3 | (7-3-9-4)    | -130.7 | (7-3-9-10)   | 9.3    |            |       |
| (7-3-9-11)   | 109.4  | (7-3-9-12)   | -90.0  | (2-4-9-1)    | -50.7  |            |       |
| (2-4-9-3)    | -99.7  | (2-4-9-10)   | -147.4 | (2-4-9-11)   | 9.1    |            |       |
| (2-4-9-12)   | 113.2  | (3-4-9-1)    | 49.0   | (3-4-9-2)    | 99.7   |            |       |
| (3-4-9-10)   | -47.7  | (3-4-9-11)   | 108.8  | (3-4-9-12)   | -147.1 |            |       |
| (8-4-9-1)    | 179.2  | (8-4-9-2)    | -130.1 | (8-4-9-3)    | 130.2  |            |       |
| (8-4-9-10)   | 82.5   | (8-4-9-11)   | -121.0 | (8-4-9-12)   | -16.9  |            |       |
| (1-5-16-17)  | 0.2    | (1-5-16-19)  | 164.8  | (1-5-16-33)  | -125.8 |            |       |
| (18-5-16-17) | -164.7 | (18-5-16-19) | -0.2   | (18-5-16-33) | 69.3   |            |       |
| (33-5-16-17) | 126.0  | (33-5-16-19) | -69.5  | (1-5-18-19)  | -155.4 |            |       |
| (1-5-18-22)  | 21.7   | (1-5-18-33)  | 137.6  | (16-5-18-19) | 0.2    |            |       |
| (16-5-18-22) | 177.2  | (16-5-18-33) | -66.9  | (33-5-18-19) | 67.0   |            |       |
| (33-5-18-22) | -115.9 | (1-5-33-16)  | 111.7  | (1-5-33-18)  | -151.0 |            |       |
| (1-5-33-19)  | 161.4  | (1-5-33-34)  | 14.3   | (1-5-33-35)  | -85.9  |            |       |
| (1-5-33-36)  | 128.4  | (16-5-33-18) | 97.3   | (16-5-33-19) | 49.7   |            |       |
| (16-5-33-34) | -97.4  | (16-5-33-35) | 162.4  | (16-5-33-36) | 16.7   |            |       |
| (18-5-33-16) | -97.3  | (18-5-33-19) | -47.6  | (18-5-33-34) | 165.3  |            |       |
| (18-5-33-35) | 65.0   | (18-5-33-36) | -80.6  | (2-6-17-16)  | -3.4   |            |       |
| (2-6-17-21)  | 161.5  | (2-6-17-26)  | -132.6 | (20-6-17-16) | -165.3 |            |       |
| (20-6-17-21) | -0.3   | (20-6-17-26) | 65.5   | (26-6-17-16) | 129.2  |            |       |
| (26-6-17-21) | -65.9  | (2-6-20-21)  | -151.6 | (2-6-20-24)  | 16.1   |            |       |
| (2-6-20-26)  | 139.9  | (17-6-20-21) | 0.3    | (17-6-20-24) | 168.0  |            |       |
| (17-6-20-26) | -68.1  | (26-6-20-21) | 68.5   | (26-6-20-24) | -123.8 |            |       |
| (2-6-26-17)  | 113.4  | (2-6-26-20)  | -147.9 | (2-6-26-21)  | 161.8  |            |       |
| (2-6-26-27)  | 58.1   | (2-6-26-29)  | -43.8  | (2-6-26-31)  | -150.6 |            |       |
| (17-6-26-20) | 98.7   | (17-6-26-21) | 48.4   | (17-6-26-27) | -55.3  |            |       |
| (17-6-26-29) | -157.3 | (17-6-26-31) | 96.0   | (20-6-26-17) | -98.7  |            |       |
| (20-6-26-21) | -50.3  | (20-6-26-27) | -153.9 | (20-6-26-29) | 104.1  |            |       |



|               |        |               |        |               |        |
|---------------|--------|---------------|--------|---------------|--------|
| (20-6-26-31)  | -2.7   | (1-9-10-13)   | 41.8   | (2-9-10-13)   | 64.8   |
| (3-9-10-13)   | 79.1   | (4-9-10-13)   | 107.7  | (11-9-10-13)  | -57.6  |
| (12-9-10-13)  | -156.9 | (1-9-11-14)   | -7.9   | (2-9-11-14)   | -50.7  |
| (3-9-11-14)   | 5.6    | (4-9-11-14)   | -56.7  | (10-9-11-14)  | 102.8  |
| (12-9-11-14)  | -158.3 | (1-9-12-15)   | 7.8    | (2-9-12-15)   | 20.5   |
| (3-9-12-15)   | -43.4  | (4-9-12-15)   | -18.4  | (10-9-12-15)  | -138.4 |
| (11-9-12-15)  | 123.2  | (5-16-17-6)   | 3.0    | (5-16-17-21)  | -148.8 |
| (5-16-17-26)  | 92.2   | (19-16-17-6)  | -147.4 | (19-16-17-21) | 60.8   |
| (19-16-17-26) | -58.2  | (33-16-17-6)  | 91.1   | (33-16-17-21) | -60.6  |
| (33-16-17-26) | -179.7 | (5-16-19-18)  | 0.2    | (5-16-19-23)  | -174.8 |
| (5-16-19-33)  | 68.7   | (17-16-19-18) | 154.9  | (17-16-19-23) | -20.1  |
| (17-16-19-33) | -136.7 | (33-16-19-18) | -68.5  | (33-16-19-23) | 116.5  |
| (5-16-33-18)  | -48.7  | (5-16-33-19)  | -96.5  | (5-16-33-34)  | 88.3   |
| (5-16-33-35)  | -33.7  | (5-16-33-36)  | -170.5 | (17-16-33-5)  | -112.7 |
| (17-16-33-18) | -161.4 | (17-16-33-19) | 150.8  | (17-16-33-34) | -24.4  |
| (17-16-33-35) | -146.5 | (17-16-33-36) | 76.8   | (19-16-33-5)  | 96.5   |
| (19-16-33-18) | 47.8   | (19-16-33-34) | -175.2 | (19-16-33-35) | 62.8   |
| (19-16-33-36) | -74.0  | (6-17-21-20)  | 0.3    | (6-17-21-25)  | -171.1 |
| (6-17-21-26)  | 67.5   | (16-17-21-20) | 156.1  | (16-17-21-25) | -15.3  |
| (16-17-21-26) | -136.7 | (26-17-21-20) | -67.2  | (26-17-21-25) | 121.4  |
| (6-17-26-20)  | -49.2  | (6-17-26-21)  | -99.2  | (6-17-26-27)  | 132.9  |
| (6-17-26-29)  | 30.2   | (6-17-26-31)  | -126.9 | (16-17-26-6)  | -112.1 |
| (16-17-26-20) | -161.2 | (16-17-26-21) | 148.7  | (16-17-26-27) | 20.8   |
| (16-17-26-29) | -81.9  | (16-17-26-31) | 121.0  | (21-17-26-6)  | 99.2   |
| (21-17-26-20) | 50.1   | (21-17-26-27) | -127.9 | (21-17-26-29) | 129.4  |
| (21-17-26-31) | -27.7  | (5-18-19-16)  | -0.2   | (5-18-19-23)  | 174.9  |
| (5-18-19-33)  | -66.5  | (22-18-19-16) | -177.3 | (22-18-19-23) | -2.2   |
| (22-18-19-33) | 116.5  | (33-18-19-16) | 66.3   | (33-18-19-23) | -118.7 |
| (5-18-33-16)  | 50.6   | (5-18-33-19)  | 99.9   | (5-18-33-34)  | -20.8  |
| (5-18-33-35)  | -121.8 | (5-18-33-36)  | 138.3  | (19-18-33-5)  | -99.9  |
| (19-18-33-16) | -49.3  | (19-18-33-34) | -120.7 | (19-18-33-35) | 138.3  |
| (19-18-33-36) | 38.4   | (22-18-33-5)  | 130.1  | (22-18-33-16) | -179.2 |
| (22-18-33-19) | -129.9 | (22-18-33-34) | 109.3  | (22-18-33-35) | 8.4    |
| (22-18-33-36) | -91.6  | (16-19-33-5)  | -50.7  | (16-19-33-18) | -99.0  |
| (16-19-33-34) | 7.5    | (16-19-33-35) | -148.6 | (16-19-33-36) | 111.7  |
| (18-19-33-5)  | 48.2   | (18-19-33-16) | 99.0   | (18-19-33-34) | 106.4  |
| (18-19-33-35) | -49.6  | (18-19-33-36) | -149.3 | (23-19-33-5)  | 179.1  |
| (23-19-33-16) | -130.2 | (23-19-33-18) | 130.8  | (23-19-33-34) | -122.7 |
| (23-19-33-35) | 81.2   | (23-19-33-36) | -18.5  | (6-20-21-17)  | -0.3   |
| (6-20-21-25)  | 171.1  | (6-20-21-26)  | -70.4  | (24-20-21-17) | -168.1 |
| (24-20-21-25) | 3.3    | (24-20-21-26) | 121.9  | (26-20-21-17) | 70.1   |
| (26-20-21-25) | -118.5 | (6-20-26-17)  | 48.3   | (6-20-26-21)  | 96.8   |
| (6-20-26-27)  | 52.4   | (6-20-26-29)  | -81.3  | (6-20-26-31)  | 178.3  |
| (21-20-26-6)  | -96.8  | (21-20-26-17) | -48.5  | (21-20-26-27) | -44.4  |
| (21-20-26-29) | -178.1 | (21-20-26-31) | 81.5   | (24-20-26-6)  | 132.4  |
| (24-20-26-17) | -179.3 | (24-20-26-21) | -130.8 | (24-20-26-27) | -175.2 |
| (24-20-26-29) | 51.1   | (24-20-26-31) | -49.3  | (17-21-26-6)  | -48.3  |
| (17-21-26-20) | -97.8  | (17-21-26-27) | 59.9   | (17-21-26-29) | -94.7  |
| (17-21-26-31) | 159.0  | (20-21-26-6)  | 49.6   | (20-21-26-17) | 97.8   |
| (20-21-26-27) | 157.7  | (20-21-26-29) | 3.1    | (20-21-26-31) | -103.2 |
| (25-21-26-6)  | 179.9  | (25-21-26-17) | -131.8 | (25-21-26-20) | 130.3  |
| (25-21-26-27) | -72.0  | (25-21-26-29) | 133.4  | (25-21-26-31) | 27.2   |
| (6-26-27-28)  | 73.6   | (17-26-27-28) | 41.2   | (20-26-27-28) | 37.6   |
| (21-26-27-28) | 6.7    | (29-26-27-28) | 171.7  | (31-26-27-28) | -88.9  |
| (6-26-29-30)  | -32.9  | (17-26-29-30) | -52.1  | (20-26-29-30) | 8.0    |
| (21-26-29-30) | 5.8    | (27-26-29-30) | -150.8 | (31-26-29-30) | 110.2  |
| (6-26-31-32)  | -1.8   | (17-26-31-32) | 55.5   | (20-26-31-32) | -3.6   |
| (21-26-31-32) | 37.9   | (27-26-31-32) | 152.6  | (29-26-31-32) | -106.9 |
| (5-33-34-37)  | 24.5   | (16-33-34-37) | -18.1  | (18-33-34-37) | 38.0   |
| (19-33-34-37) | -23.1  | (35-33-34-37) | 135.9  | (36-33-34-37) | -124.8 |
| (5-33-35-38)  | 25.9   | (16-33-35-38) | 49.5   | (18-33-35-38) | 62.4   |
| (19-33-35-38) | 92.0   | (34-33-35-38) | -72.9  | (36-33-35-38) | -172.4 |



|               |       |               |       |               |       |
|---------------|-------|---------------|-------|---------------|-------|
| (5-33-36-39)  | -37.8 | (16-33-36-39) | -26.2 | (18-33-36-39) | -89.6 |
| (19-33-36-39) | -65.9 | (34-33-36-39) | 75.5  | (35-33-36-39) | 174.5 |

|                                  |        |        |        |        |        |        |        |        |
|----------------------------------|--------|--------|--------|--------|--------|--------|--------|--------|
| Frequencies (cm <sup>-1</sup> ): | 14.1   | 21.0   | 30.0   | 39.9   | 41.3   | 51.1   | 52.5   | 73.0   |
|                                  | 77.1   | 84.0   | 84.6   | 87.5   | 92.2   | 93.2   | 95.5   | 107.3  |
|                                  | 110.8  | 113.5  | 136.4  | 142.8  | 148.1  | 152.9  | 169.7  | 209.3  |
|                                  | 242.3  | 321.1  | 331.4  | 340.2  | 346.2  | 352.9  | 368.4  | 373.2  |
|                                  | 391.5  | 405.2  | 413.6  | 419.8  | 438.0  | 447.9  | 458.5  | 463.5  |
|                                  | 464.0  | 467.2  | 471.3  | 472.3  | 502.1  | 504.3  | 507.0  | 510.4  |
|                                  | 513.7  | 516.5  | 520.0  | 524.0  | 529.6  | 543.8  | 550.8  | 591.3  |
|                                  | 595.1  | 600.1  | 602.7  | 604.6  | 606.2  | 609.7  | 613.9  | 622.2  |
|                                  | 626.6  | 631.1  | 651.0  | 665.8  | 680.6  | 764.7  | 788.2  | 812.8  |
|                                  | 820.7  | 831.5  | 834.6  | 931.7  | 965.4  | 980.7  | 1009.9 | 1017.2 |
|                                  | 1021.0 | 1106.5 | 1133.4 | 1158.2 | 1174.6 | 1176.8 | 1191.4 | 1298.0 |
|                                  | 1304.9 | 1315.3 | 1338.9 | 1347.1 | 1365.3 | 1534.7 | 1552.2 | 1567.7 |
|                                  | 2078.9 | 2081.2 | 2088.8 | 2091.1 | 2092.0 | 2098.6 | 2117.8 | 2128.1 |
|                                  | 2145.1 | 3264.3 | 3270.0 | 3275.4 | 3282.4 | 3288.9 | 3291.2 |        |

(8b) B3LYP/6-31G(d)+LANL2DZ C<sub>1</sub> Geometry

|                                         |                |          |
|-----------------------------------------|----------------|----------|
| Nuclear repulsion energy                | 4174.99205069  | Hartrees |
| B3LYP/6-31G(d)+LANL2DZ energy           | -1851.11174037 | Hartrees |
| Zero-point energy correction            | 0.213169       | Hartrees |
| Thermal correction to Enthalpy          | 0.246418       | Hartrees |
| Thermal correction to Gibbs Free Energy | 0.147634       | Hartrees |

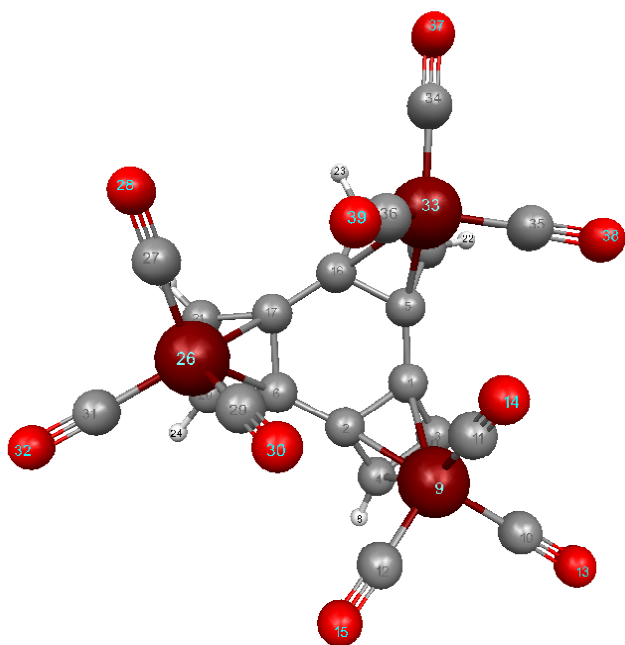

|      | X         | Y         | Z         |
|------|-----------|-----------|-----------|
| C1   | 0.968746  | -1.083572 | 1.328794  |
| C2   | 1.433639  | 0.320964  | 1.280365  |
| C3   | 2.215215  | -1.473134 | 1.938093  |
| C4   | 2.691942  | -0.104086 | 1.918489  |
| C5   | -0.437893 | -1.401715 | 1.279811  |
| C6   | 0.454868  | 1.380297  | 1.329336  |
| H7   | 2.603874  | -2.404247 | 2.328948  |
| H8   | 3.525756  | 0.412424  | 2.372425  |
| Fe9  | 2.604634  | -0.784430 | 0.007515  |
| C10  | 3.886817  | -2.010342 | -0.172666 |
| C11  | 1.678001  | -1.265168 | -1.443477 |
| C12  | 3.494251  | 0.597209  | -0.679910 |
| O13  | 4.725837  | -2.793926 | -0.271103 |
| O14  | 1.090290  | -1.582064 | -2.380974 |
| O15  | 4.064207  | 1.509948  | -1.089396 |
| C16  | -1.422060 | -0.296650 | 1.329847  |
| C17  | -0.994168 | 1.080590  | 1.281354  |
| C18  | -1.434677 | -2.278929 | 1.918731  |
| C19  | -2.381852 | -1.181677 | 1.939834  |
| C20  | 0.169248  | 2.654596  | 1.938601  |
| C21  | -1.254687 | 2.382905  | 1.919748  |
| H22  | -1.404171 | -3.260038 | 2.371055  |
| H23  | -3.382412 | -1.052805 | 2.331108  |
| H24  | 0.781857  | 3.456960  | 2.328152  |
| H25  | -2.118920 | 2.847330  | 2.373064  |
| Fe26 | -0.622941 | 2.646726  | 0.008118  |
| C27  | -2.265209 | 2.729672  | -0.676850 |
| O28  | -3.340755 | 2.768882  | -1.085860 |
| C29  | 0.253271  | 2.081433  | -1.443750 |
| O30  | 0.819479  | 1.728550  | -2.381635 |
| C31  | -0.198143 | 4.369015  | -0.174801 |
| O32  | 0.063803  | 5.486478  | -0.275915 |
| Fe33 | -1.981562 | -1.862342 | 0.008116  |
| C34  | -3.686321 | -2.353027 | -0.173076 |
| C35  | -1.235786 | -3.327248 | -0.677734 |

|            |        |            |        |            |        |            |           |           |       |
|------------|--------|------------|--------|------------|--------|------------|-----------|-----------|-------|
|            |        |            |        |            | C36    | -1.930578  | -0.821578 | -1.444595 |       |
|            |        |            |        |            | O37    | -4.785736  | -2.683040 | -0.272897 |       |
|            |        |            |        |            | O38    | -0.734892  | -4.279617 | -1.087257 |       |
|            |        |            |        |            | O39    | -1.906875  | -0.154680 | -2.382349 |       |
| (1-2)      | 1.480  | (1-3)      | 1.441  | (1-5)      | 1.443  | (1-9)      | 2.124     | (2-4)     | 1.473 |
| (2-6)      | 1.443  | (2-9)      | 2.053  | (3-4)      | 1.450  | (3-7)      | 1.082     | (3-9)     | 2.086 |
| (4-8)      | 1.081  | (4-9)      | 2.030  | (5-16)     | 1.481  | (5-18)     | 1.474     | (5-33)    | 2.052 |
| (6-17)     | 1.480  | (6-20)     | 1.441  | (6-26)     | 2.124  | (9-10)     | 1.783     | (9-11)    | 1.787 |
| (9-12)     | 1.781  | (10-13)    | 1.152  | (11-14)    | 1.151  | (12-15)    | 1.151     | (16-17)   | 1.443 |
| (16-19)    | 1.441  | (16-33)    | 2.124  | (17-21)    | 1.474  | (17-26)    | 2.052     | (18-19)   | 1.450 |
| (18-22)    | 1.081  | (18-33)    | 2.031  | (19-23)    | 1.082  | (19-33)    | 2.087     | (20-21)   | 1.450 |
| (20-24)    | 1.082  | (20-26)    | 2.087  | (21-25)    | 1.081  | (21-26)    | 2.031     | (26-27)   | 1.781 |
| (26-29)    | 1.788  | (26-31)    | 1.783  | (27-28)    | 1.151  | (29-30)    | 1.151     | (31-32)   | 1.152 |
| (33-34)    | 1.783  | (33-35)    | 1.781  | (33-36)    | 1.788  | (34-37)    | 1.152     | (35-38)   | 1.151 |
| (36-39)    | 1.151  |            |        |            |        |            |           |           |       |
| (2-1-3)    | 89.9   | (2-1-5)    | 120.9  | (2-1-9)    | 66.7   | (3-1-5)    | 142.9     |           |       |
| (3-1-9)    | 68.6   | (5-1-9)    | 139.5  | (1-2-4)    | 88.9   | (1-2-6)    | 118.8     |           |       |
| (1-2-9)    | 71.8   | (4-2-6)    | 140.9  | (4-2-9)    | 68.0   | (6-2-9)    | 143.4     |           |       |
| (1-3-4)    | 91.3   | (1-3-7)    | 134.1  | (1-3-9)    | 71.4   | (4-3-7)    | 134.4     |           |       |
| (4-3-9)    | 67.3   | (7-3-9)    | 123.5  | (2-4-3)    | 89.9   | (2-4-8)    | 134.7     |           |       |
| (2-4-9)    | 69.7   | (3-4-8)    | 134.4  | (3-4-9)    | 71.5   | (8-4-9)    | 126.1     |           |       |
| (1-5-16)   | 118.8  | (1-5-18)   | 140.9  | (1-5-33)   | 143.5  | (16-5-18)  | 88.9      |           |       |
| (16-5-33)  | 71.9   | (18-5-33)  | 68.1   | (2-6-17)   | 120.9  | (2-6-20)   | 142.9     |           |       |
| (2-6-26)   | 139.5  | (17-6-20)  | 89.9   | (17-6-26)  | 66.7   | (20-6-26)  | 68.6      |           |       |
| (1-9-2)    | 41.5   | (1-9-3)    | 40.0   | (1-9-4)    | 59.7   | (1-9-10)   | 121.3     |           |       |
| (1-9-11)   | 93.9   | (1-9-12)   | 137.2  | (2-9-3)    | 59.8   | (2-9-4)    | 42.3      |           |       |
| (2-9-10)   | 147.5  | (2-9-11)   | 110.6  | (2-9-12)   | 96.1   | (3-9-4)    | 41.2      |           |       |
| (3-9-10)   | 90.0   | (3-9-11)   | 124.4  | (3-9-12)   | 134.9  | (4-9-10)   | 107.1     |           |       |
| (4-9-11)   | 151.2  | (4-9-12)   | 94.7   | (10-9-11)  | 96.1   | (10-9-12)  | 97.8      |           |       |
| (11-9-12)  | 98.9   | (9-10-13)  | 178.9  | (9-11-14)  | 179.4  | (9-12-15)  | 178.0     |           |       |
| (5-16-17)  | 120.9  | (5-16-19)  | 89.9   | (5-16-33)  | 66.7   | (17-16-19) | 142.9     |           |       |
| (17-16-33) | 139.5  | (19-16-33) | 68.6   | (6-17-16)  | 118.8  | (6-17-21)  | 88.9      |           |       |
| (6-17-26)  | 71.9   | (16-17-21) | 140.9  | (16-17-26) | 143.4  | (21-17-26) | 68.1      |           |       |
| (5-18-19)  | 89.9   | (5-18-22)  | 134.7  | (5-18-33)  | 69.6   | (19-18-22) | 134.4     |           |       |
| (19-18-33) | 71.5   | (22-18-33) | 126.0  | (16-19-18) | 91.3   | (16-19-23) | 134.1     |           |       |
| (16-19-33) | 71.4   | (18-19-23) | 134.4  | (18-19-33) | 67.3   | (23-19-33) | 123.4     |           |       |
| (6-20-21)  | 91.3   | (6-20-24)  | 134.1  | (6-20-26)  | 71.4   | (21-20-24) | 134.4     |           |       |
| (21-20-26) | 67.3   | (24-20-26) | 123.4  | (17-21-20) | 89.9   | (17-21-25) | 134.7     |           |       |
| (17-21-26) | 69.6   | (20-21-25) | 134.4  | (20-21-26) | 71.5   | (25-21-26) | 126.0     |           |       |
| (6-26-17)  | 41.5   | (6-26-20)  | 40.0   | (6-26-21)  | 59.7   | (6-26-27)  | 137.3     |           |       |
| (6-26-29)  | 93.9   | (6-26-31)  | 121.3  | (17-26-20) | 59.8   | (17-26-21) | 42.3      |           |       |
| (17-26-27) | 96.2   | (17-26-29) | 110.6  | (17-26-31) | 147.5  | (20-26-21) | 41.2      |           |       |
| (20-26-27) | 134.9  | (20-26-29) | 124.5  | (20-26-31) | 90.0   | (21-26-27) | 94.7      |           |       |
| (21-26-29) | 151.2  | (21-26-31) | 107.2  | (27-26-29) | 98.9   | (27-26-31) | 97.8      |           |       |
| (29-26-31) | 96.0   | (26-27-28) | 178.0  | (26-29-30) | 179.4  | (26-31-32) | 178.9     |           |       |
| (5-33-16)  | 41.5   | (5-33-18)  | 42.3   | (5-33-19)  | 59.8   | (5-33-34)  | 147.5     |           |       |
| (5-33-35)  | 96.2   | (5-33-36)  | 110.6  | (16-33-18) | 59.7   | (16-33-19) | 40.0      |           |       |
| (16-33-34) | 121.2  | (16-33-35) | 137.4  | (16-33-36) | 94.0   | (18-33-19) | 41.2      |           |       |
| (18-33-34) | 107.3  | (18-33-35) | 94.6   | (18-33-36) | 151.2  | (19-33-34) | 90.0      |           |       |
| (19-33-35) | 134.8  | (19-33-36) | 124.6  | (34-33-35) | 97.7   | (34-33-36) | 96.0      |           |       |
| (35-33-36) | 98.9   | (33-34-37) | 178.9  | (33-35-38) | 178.1  | (33-36-39) | 179.5     |           |       |
| (3-1-2-4)  | -0.6   | (3-1-2-6)  | -151.7 | (3-1-2-9)  | 66.6   |            |           |           |       |
| (5-1-2-4)  | 157.8  | (5-1-2-6)  | 6.7    | (5-1-2-9)  | -135.0 |            |           |           |       |
| (9-1-2-4)  | -67.2  | (9-1-2-6)  | 141.7  | (2-1-3-4)  | 0.6    |            |           |           |       |
| (2-1-3-7)  | 176.2  | (2-1-3-9)  | -64.9  | (5-1-3-4)  | -147.7 |            |           |           |       |
| (5-1-3-7)  | 27.8   | (5-1-3-9)  | 146.8  | (9-1-3-4)  | 65.5   |            |           |           |       |
| (9-1-3-7)  | -118.9 | (2-1-5-16) | -6.6   | (2-1-5-18) | -136.5 |            |           |           |       |
| (2-1-5-33) | 91.8   | (3-1-5-16) | 135.7  | (3-1-5-18) | 5.8    |            |           |           |       |
| (3-1-5-33) | -126.0 | (9-1-5-16) | -96.2  | (9-1-5-18) | 134.0  |            |           |           |       |
| (9-1-5-33) | 2.2    | (2-1-9-3)  | 99.6   | (2-1-9-4)  | 50.8   |            |           |           |       |

|               |        |               |        |               |        |
|---------------|--------|---------------|--------|---------------|--------|
| (2-1-9-10)    | 143.3  | (2-1-9-11)    | -117.2 | (2-1-9-12)    | -9.6   |
| (3-1-9-2)     | -99.6  | (3-1-9-4)     | -48.8  | (3-1-9-10)    | 43.7   |
| (3-1-9-11)    | 143.2  | (3-1-9-12)    | -109.3 | (5-1-9-2)     | 110.9  |
| (5-1-9-3)     | -149.4 | (5-1-9-4)     | 161.8  | (5-1-9-10)    | -105.7 |
| (5-1-9-11)    | -6.2   | (5-1-9-12)    | 101.3  | (1-2-4-3)     | 0.6    |
| (1-2-4-8)     | -168.1 | (1-2-4-9)     | 70.9   | (6-2-4-3)     | 138.4  |
| (6-2-4-8)     | -30.2  | (6-2-4-9)     | -151.3 | (9-2-4-3)     | -70.2  |
| (9-2-4-8)     | 121.1  | (1-2-6-17)    | -6.5   | (1-2-6-20)    | 135.7  |
| (1-2-6-26)    | -96.0  | (4-2-6-17)    | -136.5 | (4-2-6-20)    | 5.8    |
| (4-2-6-26)    | 134.0  | (9-2-6-17)    | 91.8   | (9-2-6-20)    | -125.9 |
| (9-2-6-26)    | 2.3    | (1-2-9-3)     | -47.2  | (1-2-9-4)     | -96.3  |
| (1-2-9-10)    | -71.7  | (1-2-9-11)    | 71.5   | (1-2-9-12)    | 173.4  |
| (4-2-9-1)     | 96.3   | (4-2-9-3)     | 49.1   | (4-2-9-10)    | 24.6   |
| (4-2-9-11)    | 167.8  | (4-2-9-12)    | -90.3  | (6-2-9-1)     | -114.2 |
| (6-2-9-3)     | -161.4 | (6-2-9-4)     | 149.5  | (6-2-9-10)    | 174.1  |
| (6-2-9-11)    | -42.7  | (6-2-9-12)    | 59.2   | (1-3-4-2)     | -0.6   |
| (1-3-4-8)     | 168.1  | (1-3-4-9)     | -69.2  | (7-3-4-2)     | -176.2 |
| (7-3-4-8)     | -7.4   | (7-3-4-9)     | 115.3  | (9-3-4-2)     | 68.5   |
| (9-3-4-8)     | -122.7 | (1-3-9-2)     | 49.0   | (1-3-9-4)     | 99.6   |
| (1-3-9-10)    | -143.9 | (1-3-9-11)    | -46.5  | (1-3-9-12)    | 115.1  |
| (4-3-9-1)     | -99.6  | (4-3-9-2)     | -50.6  | (4-3-9-10)    | 116.5  |
| (4-3-9-11)    | -146.1 | (4-3-9-12)    | 15.4   | (7-3-9-1)     | 131.1  |
| (7-3-9-2)     | -179.8 | (7-3-9-4)     | -129.2 | (7-3-9-10)    | -12.7  |
| (7-3-9-11)    | 84.7   | (7-3-9-12)    | -113.8 | (2-4-9-1)     | -49.7  |
| (2-4-9-3)     | -97.0  | (2-4-9-10)    | -166.4 | (2-4-9-11)    | -24.2  |
| (2-4-9-12)    | 93.9   | (3-4-9-1)     | 47.3   | (3-4-9-2)     | 97.0   |
| (3-4-9-10)    | -69.5  | (3-4-9-11)    | 72.8   | (3-4-9-12)    | -169.1 |
| (8-4-9-1)     | 179.2  | (8-4-9-2)     | -131.1 | (8-4-9-3)     | 131.9  |
| (8-4-9-10)    | 62.5   | (8-4-9-11)    | -155.3 | (8-4-9-12)    | -37.2  |
| (1-5-16-17)   | 6.7    | (1-5-16-19)   | -151.6 | (1-5-16-33)   | 141.7  |
| (18-5-16-17)  | 157.7  | (18-5-16-19)  | -0.6   | (18-5-16-33)  | -67.2  |
| (33-5-16-17)  | -135.0 | (33-5-16-19)  | 66.6   | (1-5-18-19)   | 138.3  |
| (1-5-18-22)   | -30.4  | (1-5-18-33)   | -151.4 | (16-5-18-19)  | 0.6    |
| (16-5-18-22)  | -168.2 | (16-5-18-33)  | 70.9   | (33-5-18-19)  | -70.3  |
| (33-5-18-22)  | 121.0  | (1-5-33-16)   | -114.2 | (1-5-33-18)   | 149.5  |
| (1-5-33-19)   | -161.4 | (1-5-33-34)   | 174.5  | (1-5-33-35)   | 59.4   |
| (1-5-33-36)   | -42.5  | (16-5-33-18)  | -96.3  | (16-5-33-19)  | -47.2  |
| (16-5-33-34)  | -71.3  | (16-5-33-35)  | 173.7  | (16-5-33-36)  | 71.7   |
| (18-5-33-16)  | 96.3   | (18-5-33-19)  | 49.1   | (18-5-33-34)  | 25.0   |
| (18-5-33-35)  | -90.1  | (18-5-33-36)  | 168.0  | (2-6-17-16)   | 6.6    |
| (2-6-17-21)   | 157.7  | (2-6-17-26)   | -135.0 | (20-6-17-16)  | -151.7 |
| (20-6-17-21)  | -0.6   | (20-6-17-26)  | 66.6   | (26-6-17-16)  | 141.6  |
| (26-6-17-21)  | -67.2  | (2-6-20-21)   | -147.7 | (2-6-20-24)   | 27.9   |
| (2-6-20-26)   | 146.8  | (17-6-20-21)  | 0.6    | (17-6-20-24)  | 176.3  |
| (17-6-20-26)  | -64.9  | (26-6-20-21)  | 65.5   | (26-6-20-24)  | -118.9 |
| (2-6-26-17)   | 110.9  | (2-6-26-20)   | -149.4 | (2-6-26-21)   | 161.8  |
| (2-6-26-27)   | 101.5  | (2-6-26-29)   | -6.1   | (2-6-26-31)   | -105.6 |
| (17-6-26-20)  | 99.6   | (17-6-26-21)  | 50.8   | (17-6-26-27)  | -9.5   |
| (17-6-26-29)  | -117.0 | (17-6-26-31)  | 143.5  | (20-6-26-17)  | -99.6  |
| (20-6-26-21)  | -48.8  | (20-6-26-27)  | -109.1 | (20-6-26-29)  | 143.3  |
| (20-6-26-31)  | 43.8   | (1-9-10-13)   | -84.6  | (2-9-10-13)   | -37.2  |
| (3-9-10-13)   | -58.2  | (4-9-10-13)   | -20.1  | (11-9-10-13)  | 177.1  |
| (12-9-10-13)  | 77.2   | (1-9-11-14)   | -130.9 | (2-9-11-14)   | -170.0 |
| (3-9-11-14)   | -103.1 | (4-9-11-14)   | -152.8 | (10-9-11-14)  | -8.8   |
| (12-9-11-14)  | 90.0   | (1-9-12-15)   | 35.6   | (2-9-12-15)   | 29.2   |
| (3-9-12-15)   | -23.5  | (4-9-12-15)   | -13.3  | (10-9-12-15)  | -121.4 |
| (11-9-12-15)  | 141.2  | (5-16-17-6)   | -6.6   | (5-16-17-21)  | -136.6 |
| (5-16-17-26)  | 91.8   | (19-16-17-6)  | 135.7  | (19-16-17-21) | 5.7    |
| (19-16-17-26) | -126.0 | (33-16-17-6)  | -96.1  | (33-16-17-21) | 133.9  |
| (33-16-17-26) | 2.3    | (5-16-19-18)  | 0.6    | (5-16-19-23)  | 176.3  |
| (5-16-19-33)  | -64.9  | (17-16-19-18) | -147.7 | (17-16-19-23) | 27.9   |
| (17-16-19-33) | 146.8  | (33-16-19-18) | 65.5   | (33-16-19-23) | -118.9 |

|                                  |        |               |        |               |        |       |       |       |       |       |
|----------------------------------|--------|---------------|--------|---------------|--------|-------|-------|-------|-------|-------|
| (5-16-33-18)                     | 50.8   | (5-16-33-19)  | 99.6   | (5-16-33-34)  | 143.5  |       |       |       |       |       |
| (5-16-33-35)                     | -9.3   | (5-16-33-36)  | -117.0 | (17-16-33-5)  | 110.9  |       |       |       |       |       |
| (17-16-33-18)                    | 161.7  | (17-16-33-19) | -149.4 | (17-16-33-34) | -105.5 |       |       |       |       |       |
| (17-16-33-35)                    | 101.6  | (17-16-33-36) | -6.1   | (19-16-33-5)  | -99.6  |       |       |       |       |       |
| (19-16-33-18)                    | -48.8  | (19-16-33-34) | 43.9   | (19-16-33-35) | -109.0 |       |       |       |       |       |
| (19-16-33-36)                    | 143.4  | (6-17-21-20)  | 0.6    | (6-17-21-25)  | -168.2 |       |       |       |       |       |
| (6-17-21-26)                     | 70.9   | (16-17-21-20) | 138.4  | (16-17-21-25) | -30.3  |       |       |       |       |       |
| (16-17-21-26)                    | -151.3 | (26-17-21-20) | -70.2  | (26-17-21-25) | 121.0  |       |       |       |       |       |
| (6-17-26-20)                     | -47.1  | (6-17-26-21)  | -96.3  | (6-17-26-27)  | 173.6  |       |       |       |       |       |
| (6-17-26-29)                     | 71.7   | (6-17-26-31)  | -71.4  | (16-17-26-6)  | -114.2 |       |       |       |       |       |
| (16-17-26-20)                    | -161.4 | (16-17-26-21) | 149.5  | (16-17-26-27) | 59.3   |       |       |       |       |       |
| (16-17-26-29)                    | -42.6  | (16-17-26-31) | 174.4  | (21-17-26-6)  | 96.3   |       |       |       |       |       |
| (21-17-26-20)                    | 49.1   | (21-17-26-27) | -90.2  | (21-17-26-29) | 167.9  |       |       |       |       |       |
| (21-17-26-31)                    | 24.9   | (5-18-19-16)  | -0.6   | (5-18-19-23)  | -176.2 |       |       |       |       |       |
| (5-18-19-33)                     | 68.5   | (22-18-19-16) | 168.2  | (22-18-19-23) | -7.4   |       |       |       |       |       |
| (22-18-19-33)                    | -122.6 | (33-18-19-16) | -69.1  | (33-18-19-23) | 115.2  |       |       |       |       |       |
| (5-18-33-16)                     | -49.7  | (5-18-33-19)  | -97.0  | (5-18-33-34)  | -166.3 |       |       |       |       |       |
| (5-18-33-35)                     | 94.1   | (5-18-33-36)  | -23.8  | (19-18-33-5)  | 97.0   |       |       |       |       |       |
| (19-18-33-16)                    | 47.3   | (19-18-33-34) | -69.3  | (19-18-33-35) | -168.9 |       |       |       |       |       |
| (19-18-33-36)                    | 73.2   | (22-18-33-5)  | -131.1 | (22-18-33-16) | 179.2  |       |       |       |       |       |
| (22-18-33-19)                    | 131.9  | (22-18-33-34) | 62.7   | (22-18-33-35) | -36.9  |       |       |       |       |       |
| (22-18-33-36)                    | -154.8 | (16-19-33-5)  | 49.1   | (16-19-33-18) | 99.7   |       |       |       |       |       |
| (16-19-33-34)                    | -143.6 | (16-19-33-35) | 115.4  | (16-19-33-36) | -46.3  |       |       |       |       |       |
| (18-19-33-5)                     | -50.6  | (18-19-33-16) | -99.7  | (18-19-33-34) | 116.7  |       |       |       |       |       |
| (18-19-33-35)                    | 15.7   | (18-19-33-36) | -145.9 | (23-19-33-5)  | -179.8 |       |       |       |       |       |
| (23-19-33-16)                    | 131.1  | (23-19-33-18) | -129.2 | (23-19-33-34) | -12.5  |       |       |       |       |       |
| (23-19-33-35)                    | -113.5 | (23-19-33-36) | 84.8   | (6-20-21-17)  | -0.6   |       |       |       |       |       |
| (6-20-21-25)                     | 168.2  | (6-20-21-26)  | -69.2  | (24-20-21-17) | -176.3 |       |       |       |       |       |
| (24-20-21-25)                    | -7.4   | (24-20-21-26) | 115.2  | (26-20-21-17) | 68.5   |       |       |       |       |       |
| (26-20-21-25)                    | -122.7 | (6-20-26-17)  | 49.0   | (6-20-26-21)  | 99.6   |       |       |       |       |       |
| (6-20-26-27)                     | 115.3  | (6-20-26-29)  | -46.3  | (6-20-26-31)  | -143.7 |       |       |       |       |       |
| (21-20-26-6)                     | -99.6  | (21-20-26-17) | -50.6  | (21-20-26-27) | 15.6   |       |       |       |       |       |
| (21-20-26-29)                    | -146.0 | (21-20-26-31) | 116.7  | (24-20-26-6)  | 131.1  |       |       |       |       |       |
| (24-20-26-17)                    | -179.9 | (24-20-26-21) | -129.3 | (24-20-26-27) | -113.6 |       |       |       |       |       |
| (24-20-26-29)                    | 84.8   | (24-20-26-31) | -12.6  | (17-21-26-6)  | -49.7  |       |       |       |       |       |
| (17-21-26-20)                    | -97.0  | (17-21-26-27) | 94.0   | (17-21-26-29) | -23.9  |       |       |       |       |       |
| (17-21-26-31)                    | -166.3 | (20-21-26-6)  | 47.3   | (20-21-26-17) | 97.0   |       |       |       |       |       |
| (20-21-26-27)                    | -169.0 | (20-21-26-29) | 73.0   | (20-21-26-31) | -69.3  |       |       |       |       |       |
| (25-21-26-6)                     | 179.2  | (25-21-26-17) | -131.1 | (25-21-26-20) | 131.9  |       |       |       |       |       |
| (25-21-26-27)                    | -37.0  | (25-21-26-29) | -155.0 | (25-21-26-31) | 62.6   |       |       |       |       |       |
| (6-26-27-28)                     | 34.6   | (17-26-27-28) | 28.3   | (20-26-27-28) | -24.5  |       |       |       |       |       |
| (21-26-27-28)                    | -14.2  | (29-26-27-28) | 140.3  | (31-26-27-28) | -122.3 |       |       |       |       |       |
| (6-26-29-30)                     | -130.0 | (17-26-29-30) | -169.0 | (20-26-29-30) | -102.2 |       |       |       |       |       |
| (21-26-29-30)                    | -152.1 | (27-26-29-30) | 90.9   | (31-26-29-30) | -7.9   |       |       |       |       |       |
| (6-26-31-32)                     | -85.8  | (17-26-31-32) | -38.5  | (20-26-31-32) | -59.3  |       |       |       |       |       |
| (21-26-31-32)                    | -21.3  | (27-26-31-32) | 76.1   | (29-26-31-32) | 175.9  |       |       |       |       |       |
| (5-33-34-37)                     | -37.8  | (16-33-34-37) | -84.9  | (18-33-34-37) | -20.4  |       |       |       |       |       |
| (19-33-34-37)                    | -58.5  | (35-33-34-37) | 76.9   | (36-33-34-37) | 176.7  |       |       |       |       |       |
| (5-33-35-38)                     | 29.5   | (16-33-35-38) | 35.7   | (18-33-35-38) | -13.0  |       |       |       |       |       |
| (19-33-35-38)                    | -23.3  | (34-33-35-38) | -121.1 | (36-33-35-38) | 141.5  |       |       |       |       |       |
| (5-33-36-39)                     | -168.3 | (16-33-36-39) | -129.2 | (18-33-36-39) | -151.4 |       |       |       |       |       |
| (19-33-36-39)                    | -101.4 | (34-33-36-39) | -7.2   | (35-33-36-39) | 91.6   |       |       |       |       |       |
| Frequencies (cm <sup>-1</sup> ): | 16.2   | 21.1          | 43.4   | 46.1          | 46.4   | 57.1  | 70.3  | 83.7  |       |       |
|                                  | 84.1   | 85.6          | 88.4   | 89.5          | 95.2   | 95.3  | 101.7 | 112.8 | 113.5 | 114.5 |
|                                  | 135.4  | 135.7         | 143.5  | 182.6         | 209.1  | 209.8 | 238.7 | 239.8 | 247.3 | 350.3 |
|                                  | 350.5  | 379.2         | 386.0  | 386.3         | 392.5  | 403.8 | 404.0 | 425.2 | 450.7 | 451.1 |
|                                  | 460.5  | 465.5         | 465.8  | 468.0         | 469.0  | 469.1 | 500.9 | 506.6 | 506.8 | 509.0 |
|                                  | 509.2  | 511.7         | 515.1  | 530.6         | 530.8  | 554.3 | 554.4 | 594.9 | 600.4 | 600.7 |
|                                  | 601.9  | 606.8         | 607.5  | 617.4         | 619.8  | 620.2 | 628.6 | 648.0 | 659.5 | 660.4 |
|                                  | 705.1  | 769.9         | 771.7  | 781.4         | 826.8  | 827.8 | 832.7 | 924.5 | 969.4 | 969.7 |

1010.6 1018.6 1018.9 1093.7 1136.3 1157.9 1158.2 1181.1 1181.5 1305.2  
 1305.3 1311.5 1331.7 1331.9 1363.2 1539.1 1539.9 1540.7 2081.5 2081.6  
 2086.2 2094.6 2094.8 2098.3 2121.7 2121.8 2151.3 3265.1 3265.5 3265.9  
 3285.6 3285.9 3286.3

(9a) B3LYP/6-31G(d) D<sub>2h</sub> Geometry

Nuclear repulsion energy 436.31508718 Hartrees  
 B3LYP/6-31G(d) energy -384.46618151 Hartrees  
 Zero-point energy correction 0.119156 Hartrees  
 Thermal correction to Enthalpy 0.127230 Hartrees  
 Thermal correction to Gibbs Free Energy 0.089163 Hartrees

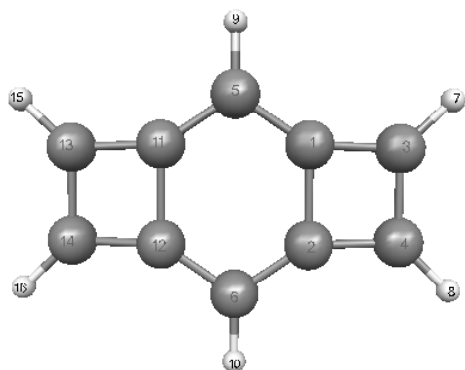

|     | X        | Y         | Z         |
|-----|----------|-----------|-----------|
| C1  | 0.000000 | 1.150441  | 0.782092  |
| C2  | 0.000000 | 1.150441  | -0.782092 |
| C3  | 0.000000 | 2.541059  | 0.729104  |
| C4  | 0.000000 | 2.541059  | -0.729104 |
| C5  | 0.000000 | 0.000000  | 1.559929  |
| C6  | 0.000000 | 0.000000  | -1.559929 |
| H7  | 0.000000 | 3.327203  | 1.476054  |
| H8  | 0.000000 | 3.327203  | -1.476054 |
| H9  | 0.000000 | 0.000000  | 2.647423  |
| H10 | 0.000000 | 0.000000  | -2.647423 |
| C11 | 0.000000 | -1.150441 | 0.782092  |
| C12 | 0.000000 | -1.150441 | -0.782092 |
| C13 | 0.000000 | -2.541059 | 0.729104  |
| C14 | 0.000000 | -2.541059 | -0.729104 |
| H15 | 0.000000 | -3.327203 | 1.476054  |
| H16 | 0.000000 | -3.327203 | -1.476054 |

|               |       |               |       |               |       |            |       |         |       |
|---------------|-------|---------------|-------|---------------|-------|------------|-------|---------|-------|
| (1-2)         | 1.564 | (1-3)         | 1.392 | (1-5)         | 1.389 | (2-4)      | 1.392 | (2-6)   | 1.389 |
| (3-4)         | 1.458 | (3-7)         | 1.084 | (4-8)         | 1.084 | (5-9)      | 1.087 | (5-11)  | 1.389 |
| (6-10)        | 1.087 | (6-12)        | 1.389 | (11-12)       | 1.564 | (11-13)    | 1.392 | (12-14) | 1.392 |
| (13-14)       | 1.458 | (13-15)       | 1.084 | (14-16)       | 1.084 |            |       |         |       |
| (2-1-3)       | 87.8  | (2-1-5)       | 124.1 | (3-1-5)       | 148.1 | (1-2-4)    | 87.8  |         |       |
| (1-2-6)       | 124.1 | (4-2-6)       | 148.1 | (1-3-4)       | 92.2  | (1-3-7)    | 134.3 |         |       |
| (4-3-7)       | 133.5 | (2-4-3)       | 92.2  | (2-4-8)       | 134.3 | (3-4-8)    | 133.5 |         |       |
| (1-5-9)       | 124.1 | (1-5-11)      | 111.9 | (9-5-11)      | 124.1 | (2-6-10)   | 124.1 |         |       |
| (2-6-12)      | 111.9 | (10-6-12)     | 124.1 | (5-11-12)     | 124.1 | (5-11-13)  | 148.1 |         |       |
| (12-11-13)    | 87.8  | (6-12-11)     | 124.1 | (6-12-14)     | 148.1 | (11-12-14) | 87.8  |         |       |
| (11-13-14)    | 92.2  | (11-13-15)    | 134.3 | (14-13-15)    | 133.5 | (12-14-13) | 92.2  |         |       |
| (12-14-16)    | 134.3 | (13-14-16)    | 133.5 |               |       |            |       |         |       |
| (3-1-2-4)     | 0.0   | (3-1-2-6)     | 180.0 | (5-1-2-4)     | 180.0 |            |       |         |       |
| (5-1-2-6)     | 0.0   | (2-1-3-4)     | 0.0   | (2-1-3-7)     | 180.0 |            |       |         |       |
| (5-1-3-4)     | 180.0 | (5-1-3-7)     | 0.0   | (2-1-5-9)     | 180.0 |            |       |         |       |
| (2-1-5-11)    | 0.0   | (3-1-5-9)     | 0.0   | (3-1-5-11)    | 180.0 |            |       |         |       |
| (1-2-4-3)     | 0.0   | (1-2-4-8)     | 180.0 | (6-2-4-3)     | 180.0 |            |       |         |       |
| (6-2-4-8)     | 0.0   | (1-2-6-10)    | 180.0 | (1-2-6-12)    | 0.0   |            |       |         |       |
| (4-2-6-10)    | 0.0   | (4-2-6-12)    | 180.0 | (1-3-4-2)     | 0.0   |            |       |         |       |
| (1-3-4-8)     | 180.0 | (7-3-4-2)     | 180.0 | (7-3-4-8)     | 0.0   |            |       |         |       |
| (1-5-11-12)   | 0.0   | (1-5-11-13)   | 180.0 | (9-5-11-12)   | 180.0 |            |       |         |       |
| (9-5-11-13)   | 0.0   | (2-6-12-11)   | 0.0   | (2-6-12-14)   | 180.0 |            |       |         |       |
| (10-6-12-11)  | 180.0 | (10-6-12-14)  | 0.0   | (5-11-12-6)   | 0.0   |            |       |         |       |
| (5-11-12-14)  | 180.0 | (13-11-12-6)  | 180.0 | (13-11-12-14) | 0.0   |            |       |         |       |
| (5-11-13-14)  | 180.0 | (5-11-13-15)  | 0.0   | (12-11-13-14) | 0.0   |            |       |         |       |
| (12-11-13-15) | 180.0 | (6-12-14-13)  | 180.0 | (6-12-14-16)  | 0.0   |            |       |         |       |
| (11-12-14-13) | 0.0   | (11-12-14-16) | 180.0 | (11-13-14-12) | 0.0   |            |       |         |       |
| (11-13-14-16) | 180.0 | (15-13-14-12) | 180.0 | (15-13-14-16) | 0.0   |            |       |         |       |

Frequencies (cm<sup>-1</sup>): 148.0 221.9 371.0 378.7 387.8 426.1 443.8 492.0  
 608.2 668.7 724.7 725.2 728.4 793.9 795.6 799.9 801.6 825.1  
 842.4 884.6 893.6 1013.6 1114.1 1164.9 1168.7 1215.0 1230.8 1271.5  
 1283.9 1324.6 1331.1 1348.6 1561.6 1651.1 1663.3 1667.2 3190.4 3190.5  
 3227.4 3229.2 3247.4 3247.4

(10a) B3LYP/6-31G(d)+LANL2DZ C<sub>s</sub> Geometry

Nuclear repulsion energy 1252.77584015 Hartrees  
 B3LYP/6-31G(d)+LANL2DZ energy -847.98798128 Hartrees  
 Zero-point energy correction 0.147980 Hartrees  
 Thermal correction to Enthalpy 0.163054 Hartrees  
 Thermal correction to Gibbs Free Energy 0.106877 Hartrees

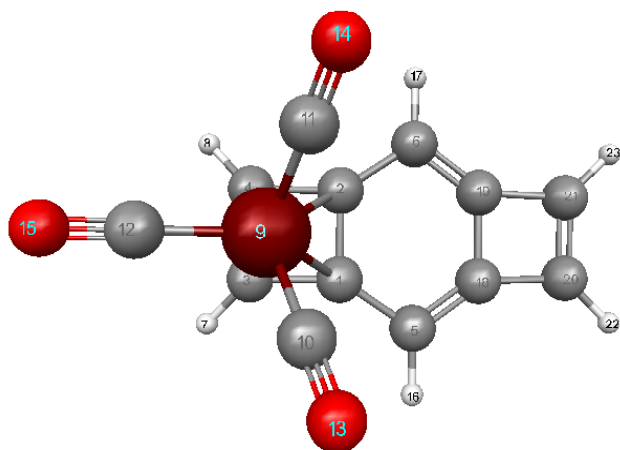

|     | X         | Y         | Z         |
|-----|-----------|-----------|-----------|
| C1  | 1.000539  | 0.567097  | 0.723971  |
| C2  | 1.000539  | 0.567097  | -0.723971 |
| C3  | 1.786343  | -0.662255 | 0.735872  |
| C4  | 1.786343  | -0.662255 | -0.735872 |
| C5  | 0.525725  | 1.686132  | 1.515376  |
| C6  | 0.525725  | 1.686132  | -1.515376 |
| H7  | 2.358593  | -1.182901 | 1.490468  |
| H8  | 2.358593  | -1.182901 | -1.490468 |
| Fe9 | -0.022870 | -1.180716 | 0.000000  |
| C10 | -1.179426 | -1.114769 | 1.359267  |
| C11 | -1.179426 | -1.114769 | -1.359267 |
| C12 | 0.278113  | -2.927527 | 0.000000  |
| O13 | -1.905449 | -1.070106 | 2.254696  |
| O14 | -1.905449 | -1.070106 | -2.254696 |
| O15 | 0.500674  | -4.059820 | 0.000000  |
| H16 | 0.520991  | 1.683599  | 2.600947  |
| H17 | 0.520991  | 1.683599  | -2.600947 |
| C18 | 0.118813  | 2.714683  | 0.737559  |
| C19 | 0.118813  | 2.714683  | -0.737559 |
| C20 | -0.480340 | 4.082236  | 0.681347  |
| C21 | -0.480340 | 4.082236  | -0.681347 |
| H22 | -0.805638 | 4.792571  | 1.432279  |
| H23 | -0.805638 | 4.792571  | -1.432279 |

|           |       |           |       |           |       |           |       |         |       |
|-----------|-------|-----------|-------|-----------|-------|-----------|-------|---------|-------|
| (1-2)     | 1.448 | (1-3)     | 1.459 | (1-5)     | 1.451 | (1-9)     | 2.151 | (2-4)   | 1.459 |
| (2-6)     | 1.451 | (2-9)     | 2.151 | (3-4)     | 1.472 | (3-7)     | 1.081 | (3-9)   | 2.021 |
| (4-8)     | 1.081 | (4-9)     | 2.021 | (5-16)    | 1.086 | (5-18)    | 1.352 | (6-17)  | 1.086 |
| (6-19)    | 1.352 | (9-10)    | 1.786 | (9-11)    | 1.786 | (9-12)    | 1.773 | (10-13) | 1.154 |
| (11-14)   | 1.154 | (12-15)   | 1.154 | (18-19)   | 1.475 | (18-20)   | 1.494 | (19-21) | 1.494 |
| (20-21)   | 1.363 | (20-22)   | 1.084 | (21-23)   | 1.084 |           |       |         |       |
| (2-1-3)   | 90.5  | (2-1-5)   | 123.1 | (2-1-9)   | 70.3  | (3-1-5)   | 145.3 |         |       |
| (3-1-9)   | 64.8  | (5-1-9)   | 130.9 | (1-2-4)   | 90.5  | (1-2-6)   | 123.1 |         |       |
| (1-2-9)   | 70.3  | (4-2-6)   | 145.3 | (4-2-9)   | 64.8  | (6-2-9)   | 130.9 |         |       |
| (1-3-4)   | 89.5  | (1-3-7)   | 134.2 | (1-3-9)   | 74.4  | (4-3-7)   | 134.3 |         |       |
| (4-3-9)   | 68.6  | (7-3-9)   | 127.2 | (2-4-3)   | 89.5  | (2-4-8)   | 134.2 |         |       |
| (2-4-9)   | 74.4  | (3-4-8)   | 134.3 | (3-4-9)   | 68.6  | (8-4-9)   | 127.2 |         |       |
| (1-5-16)  | 123.0 | (1-5-18)  | 111.8 | (16-5-18) | 125.1 | (2-6-17)  | 123.0 |         |       |
| (2-6-19)  | 111.8 | (17-6-19) | 125.1 | (1-9-2)   | 39.3  | (1-9-3)   | 40.8  |         |       |
| (1-9-4)   | 59.2  | (1-9-10)  | 91.3  | (1-9-11)  | 122.3 | (1-9-12)  | 136.1 |         |       |
| (2-9-3)   | 59.2  | (2-9-4)   | 40.8  | (2-9-10)  | 122.3 | (2-9-11)  | 91.3  |         |       |
| (2-9-12)  | 136.1 | (3-9-4)   | 42.7  | (3-9-10)  | 107.0 | (3-9-11)  | 147.9 |         |       |
| (3-9-12)  | 95.8  | (4-9-10)  | 147.9 | (4-9-11)  | 107.0 | (4-9-12)  | 95.8  |         |       |
| (10-9-11) | 99.1  | (10-9-12) | 98.4  | (11-9-12) | 98.4  | (9-10-13) | 178.6 |         |       |
| (9-11-14) | 178.6 | (9-12-15) | 178.7 | (5-18-19) | 125.1 | (5-18-20) | 147.0 |         |       |



|               |        |               |        |               |        |            |      |
|---------------|--------|---------------|--------|---------------|--------|------------|------|
| (19-18-20)    | 87.8   | (6-19-18)     | 125.1  | (6-19-21)     | 147.0  | (18-19-21) | 87.8 |
| (18-20-21)    | 92.2   | (18-20-22)    | 134.0  | (21-20-22)    | 133.9  | (19-21-20) | 92.2 |
| (19-21-23)    | 134.0  | (20-21-23)    | 133.9  |               |        |            |      |
| (3-1-2-4)     | 0.0    | (3-1-2-6)     | -170.4 | (3-1-2-9)     | 62.9   |            |      |
| (5-1-2-4)     | 170.4  | (5-1-2-6)     | 0.0    | (5-1-2-9)     | -126.7 |            |      |
| (9-1-2-4)     | -62.9  | (9-1-2-6)     | 126.7  | (2-1-3-4)     | 0.0    |            |      |
| (2-1-3-7)     | 164.9  | (2-1-3-9)     | -67.9  | (5-1-3-4)     | -165.8 |            |      |
| (5-1-3-7)     | -0.9   | (5-1-3-9)     | 126.3  | (9-1-3-4)     | 67.9   |            |      |
| (9-1-3-7)     | -127.2 | (2-1-5-16)    | 179.7  | (2-1-5-18)    | -1.2   |            |      |
| (3-1-5-16)    | -17.3  | (3-1-5-18)    | 161.7  | (9-1-5-16)    | 87.8   |            |      |
| (9-1-5-18)    | -93.1  | (2-1-9-3)     | 100.2  | (2-1-9-4)     | 48.5   |            |      |
| (2-1-9-10)    | -144.7 | (2-1-9-11)    | -43.1  | (2-1-9-12)    | 111.8  |            |      |
| (3-1-9-2)     | -100.2 | (3-1-9-4)     | -51.8  | (3-1-9-10)    | 115.0  |            |      |
| (3-1-9-11)    | -143.3 | (3-1-9-12)    | 11.5   | (5-1-9-2)     | 117.2  |            |      |
| (5-1-9-3)     | -142.6 | (5-1-9-4)     | 165.6  | (5-1-9-10)    | -27.5  |            |      |
| (5-1-9-11)    | 74.1   | (5-1-9-12)    | -131.0 | (1-2-4-3)     | 0.0    |            |      |
| (1-2-4-8)     | -164.9 | (1-2-4-9)     | 67.9   | (6-2-4-3)     | 165.8  |            |      |
| (6-2-4-8)     | 0.9    | (6-2-4-9)     | -126.3 | (9-2-4-3)     | -67.9  |            |      |
| (9-2-4-8)     | 127.2  | (1-2-6-17)    | -179.7 | (1-2-6-19)    | 1.2    |            |      |
| (4-2-6-17)    | 17.3   | (4-2-6-19)    | -161.7 | (9-2-6-17)    | -87.8  |            |      |
| (9-2-6-19)    | 93.1   | (1-2-9-3)     | -48.5  | (1-2-9-4)     | -100.2 |            |      |
| (1-2-9-10)    | 43.1   | (1-2-9-11)    | 144.7  | (1-2-9-12)    | -111.8 |            |      |
| (4-2-9-1)     | 100.2  | (4-2-9-3)     | 51.8   | (4-2-9-10)    | 143.3  |            |      |
| (4-2-9-11)    | -115.0 | (4-2-9-12)    | -11.5  | (6-2-9-1)     | -117.2 |            |      |
| (6-2-9-3)     | -165.6 | (6-2-9-4)     | 142.6  | (6-2-9-10)    | -74.1  |            |      |
| (6-2-9-11)    | 27.5   | (6-2-9-12)    | 131.0  | (1-3-4-2)     | 0.0    |            |      |
| (1-3-4-8)     | 164.9  | (1-3-4-9)     | -73.4  | (7-3-4-2)     | -164.9 |            |      |
| (7-3-4-8)     | 0.0    | (7-3-4-9)     | 121.7  | (9-3-4-2)     | 73.4   |            |      |
| (9-3-4-8)     | -121.7 | (1-3-9-2)     | 46.6   | (1-3-9-4)     | 95.7   |            |      |
| (1-3-9-10)    | -71.3  | (1-3-9-11)    | 72.0   | (1-3-9-12)    | -172.0 |            |      |
| (4-3-9-1)     | -95.7  | (4-3-9-2)     | -49.2  | (4-3-9-10)    | -167.1 |            |      |
| (4-3-9-11)    | -23.8  | (4-3-9-12)    | 92.3   | (7-3-9-1)     | 134.1  |            |      |
| (7-3-9-2)     | -179.3 | (7-3-9-4)     | -130.1 | (7-3-9-10)    | 62.8   |            |      |
| (7-3-9-11)    | -153.9 | (7-3-9-12)    | -37.9  | (2-4-9-1)     | -46.6  |            |      |
| (2-4-9-3)     | -95.7  | (2-4-9-10)    | -72.0  | (2-4-9-11)    | 71.3   |            |      |
| (2-4-9-12)    | 172.0  | (3-4-9-1)     | 49.2   | (3-4-9-2)     | 95.7   |            |      |
| (3-4-9-10)    | 23.8   | (3-4-9-11)    | 167.1  | (3-4-9-12)    | -92.3  |            |      |
| (8-4-9-1)     | 179.3  | (8-4-9-2)     | -134.1 | (8-4-9-3)     | 130.1  |            |      |
| (8-4-9-10)    | 153.9  | (8-4-9-11)    | -62.8  | (8-4-9-12)    | 37.9   |            |      |
| (1-5-18-19)   | 1.3    | (1-5-18-20)   | 177.5  | (16-5-18-19)  | -179.7 |            |      |
| (16-5-18-20)  | -3.5   | (2-6-19-18)   | -1.3   | (2-6-19-21)   | -177.5 |            |      |
| (17-6-19-18)  | 179.7  | (17-6-19-21)  | 3.5    | (1-9-10-13)   | -50.2  |            |      |
| (2-9-10-13)   | -75.8  | (3-9-10-13)   | -11.9  | (4-9-10-13)   | -28.5  |            |      |
| (11-9-10-13)  | -173.2 | (12-9-10-13)  | 86.8   | (1-9-11-14)   | 75.8   |            |      |
| (2-9-11-14)   | 50.2   | (3-9-11-14)   | 28.5   | (4-9-11-14)   | 11.9   |            |      |
| (10-9-11-14)  | 173.2  | (12-9-11-14)  | -86.8  | (1-9-12-15)   | -29.0  |            |      |
| (2-9-12-15)   | 29.0   | (3-9-12-15)   | -21.5  | (4-9-12-15)   | 21.5   |            |      |
| (10-9-12-15)  | -129.7 | (11-9-12-15)  | 129.7  | (5-18-19-6)   | 0.0    |            |      |
| (5-18-19-21)  | 177.9  | (20-18-19-6)  | -177.9 | (20-18-19-21) | 0.0    |            |      |
| (5-18-20-21)  | -176.9 | (5-18-20-22)  | 2.2    | (19-18-20-21) | 0.0    |            |      |
| (19-18-20-22) | 179.1  | (6-19-21-20)  | 176.9  | (6-19-21-23)  | -2.2   |            |      |
| (18-19-21-20) | 0.0    | (18-19-21-23) | -179.1 | (18-20-21-19) | 0.0    |            |      |
| (18-20-21-23) | 179.1  | (22-20-21-19) | -179.1 | (22-20-21-23) | 0.0    |            |      |

|                                  |        |        |        |        |        |        |        |        |        |        |
|----------------------------------|--------|--------|--------|--------|--------|--------|--------|--------|--------|--------|
| Frequencies (cm <sup>-1</sup> ): | -5.6   | 57.9   | 84.0   | 86.6   | 99.4   | 102.8  | 137.7  | 172.1  |        |        |
|                                  | 220.1  | 296.0  | 301.5  | 371.1  | 388.2  | 392.6  | 432.8  | 446.0  | 455.1  | 462.4  |
|                                  | 479.4  | 496.8  | 511.6  | 515.4  | 527.7  | 600.6  | 604.1  | 618.9  | 629.3  | 732.5  |
|                                  | 746.5  | 755.1  | 770.5  | 775.6  | 794.7  | 848.9  | 857.1  | 861.1  | 862.2  | 920.4  |
|                                  | 983.1  | 1007.5 | 1048.2 | 1085.6 | 1120.1 | 1193.4 | 1210.4 | 1264.6 | 1279.2 | 1292.1 |
|                                  | 1376.9 | 1457.5 | 1512.0 | 1549.0 | 1677.1 | 1704.8 | 2076.9 | 2078.3 | 2123.6 | 3215.7 |
|                                  | 3215.9 | 3240.7 | 3267.5 | 3272.6 | 3287.8 |        |        |        |        |        |



(11a) B3LYP/6-31G(d)+LANL2DZ C<sub>2v</sub> Geometry

|                                         |                |          |
|-----------------------------------------|----------------|----------|
| Nuclear repulsion energy                | 2355.29935392  | Hartrees |
| B3LYP/6-31G(d)+LANL2DZ energy           | -1311.47183165 | Hartrees |
| Zero-point energy correction            | 0.174764       | Hartrees |
| Thermal correction to Enthalpy          | 0.198932       | Hartrees |
| Thermal correction to Gibbs Free Energy | 0.119892       | Hartrees |

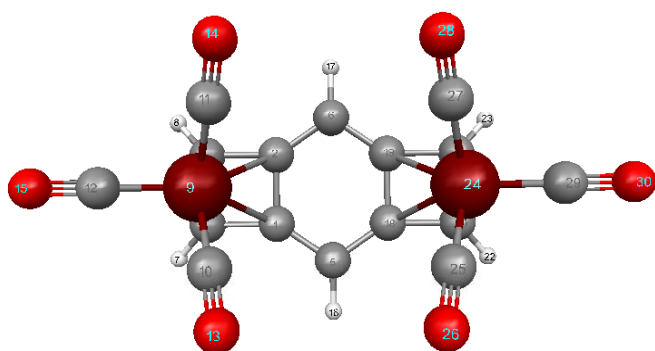

|      | X         | Y         | Z         |
|------|-----------|-----------|-----------|
| C1   | 0.729687  | 1.166096  | 1.624936  |
| C2   | -0.729687 | 1.166096  | 1.624936  |
| C3   | 0.739598  | 2.639694  | 1.699697  |
| C4   | -0.739598 | 2.639694  | 1.699697  |
| C5   | 1.507453  | 0.000000  | 1.622110  |
| C6   | -1.507453 | 0.000000  | 1.622110  |
| H7   | 1.478860  | 3.340044  | 2.064501  |
| H8   | -1.478860 | 3.340044  | 2.064501  |
| Fe9  | 0.000000  | 2.463389  | -0.139258 |
| C10  | 1.414261  | 2.051051  | -1.187299 |
| C11  | -1.414261 | 2.051051  | -1.187299 |
| C12  | 0.000000  | 4.184461  | -0.480412 |
| O13  | 2.336346  | 1.814680  | -1.833849 |
| O14  | -2.336346 | 1.814680  | -1.833849 |
| O15  | 0.000000  | 5.321622  | -0.671604 |
| H16  | 2.589979  | 0.000000  | 1.707934  |
| H17  | -2.589979 | 0.000000  | 1.707934  |
| C18  | 0.729687  | -1.166096 | 1.624936  |
| C19  | -0.729687 | -1.166096 | 1.624936  |
| C20  | 0.739598  | -2.639694 | 1.699697  |
| C21  | -0.739598 | -2.639694 | 1.699697  |
| H22  | 1.478860  | -3.340044 | 2.064501  |
| H23  | -1.478860 | -3.340044 | 2.064501  |
| Fe24 | 0.000000  | -2.463389 | -0.139258 |
| C25  | 1.414261  | -2.051051 | -1.187299 |
| O26  | 2.336346  | -1.814680 | -1.833849 |
| C27  | -1.414261 | -2.051051 | -1.187299 |
| O28  | -2.336346 | -1.814680 | -1.833849 |
| C29  | 0.000000  | -4.184461 | -0.480412 |
| O30  | 0.000000  | -5.321622 | -0.671604 |

|          |       |           |       |           |       |          |       |         |       |
|----------|-------|-----------|-------|-----------|-------|----------|-------|---------|-------|
| (1-2)    | 1.459 | (1-3)     | 1.476 | (1-5)     | 1.402 | (1-9)    | 2.308 | (2-4)   | 1.476 |
| (2-6)    | 1.402 | (2-9)     | 2.308 | (3-4)     | 1.479 | (3-7)    | 1.082 | (3-9)   | 1.990 |
| (4-8)    | 1.082 | (4-9)     | 1.990 | (5-16)    | 1.086 | (5-18)   | 1.402 | (6-17)  | 1.086 |
| (6-19)   | 1.402 | (9-10)    | 1.808 | (9-11)    | 1.808 | (9-12)   | 1.755 | (10-13) | 1.151 |
| (11-14)  | 1.151 | (12-15)   | 1.153 | (18-19)   | 1.459 | (18-20)  | 1.476 | (18-24) | 2.308 |
| (19-21)  | 1.476 | (19-24)   | 2.308 | (20-21)   | 1.479 | (20-22)  | 1.082 | (20-24) | 1.990 |
| (21-23)  | 1.082 | (21-24)   | 1.990 | (24-25)   | 1.808 | (24-27)  | 1.808 | (24-29) | 1.755 |
| (25-26)  | 1.151 | (27-28)   | 1.151 | (29-30)   | 1.153 |          |       |         |       |
| (2-1-3)  | 90.4  | (2-1-5)   | 123.7 | (2-1-9)   | 71.6  | (3-1-5)  | 145.8 |         |       |
| (3-1-9)  | 58.6  | (5-1-9)   | 129.9 | (1-2-4)   | 90.4  | (1-2-6)  | 123.7 |         |       |
| (1-2-9)  | 71.6  | (4-2-6)   | 145.8 | (4-2-9)   | 58.6  | (6-2-9)  | 129.9 |         |       |
| (1-3-4)  | 89.6  | (1-3-7)   | 131.9 | (1-3-9)   | 82.1  | (4-3-7)  | 133.1 |         |       |
| (4-3-9)  | 68.2  | (7-3-9)   | 128.5 | (2-4-3)   | 89.6  | (2-4-8)  | 131.9 |         |       |
| (2-4-9)  | 82.1  | (3-4-8)   | 133.1 | (3-4-9)   | 68.2  | (8-4-9)  | 128.5 |         |       |
| (1-5-16) | 123.6 | (1-5-18)  | 112.6 | (16-5-18) | 123.6 | (2-6-17) | 123.6 |         |       |
| (2-6-19) | 112.6 | (17-6-19) | 123.6 | (1-9-2)   | 36.9  | (1-9-3)  | 39.3  |         |       |
| (1-9-4)  | 57.4  | (1-9-10)  | 93.9  | (1-9-11)  | 124.2 | (1-9-12) | 134.4 |         |       |
| (2-9-3)  | 57.4  | (2-9-4)   | 39.3  | (2-9-10)  | 124.2 | (2-9-11) | 93.9  |         |       |
| (2-9-12) | 134.4 | (3-9-4)   | 43.6  | (3-9-10)  | 105.4 | (3-9-11) | 147.9 |         |       |

|              |        |              |        |              |        |            |       |
|--------------|--------|--------------|--------|--------------|--------|------------|-------|
| (3-9-12)     | 95.3   | (4-9-10)     | 147.9  | (4-9-11)     | 105.4  | (4-9-12)   | 95.3  |
| (10-9-11)    | 102.9  | (10-9-12)    | 96.4   | (11-9-12)    | 96.4   | (9-10-13)  | 178.0 |
| (9-11-14)    | 178.0  | (9-12-15)    | 178.3  | (5-18-19)    | 123.7  | (5-18-20)  | 145.8 |
| (5-18-24)    | 129.9  | (19-18-20)   | 90.4   | (19-18-24)   | 71.6   | (20-18-24) | 58.6  |
| (6-19-18)    | 123.7  | (6-19-21)    | 145.8  | (6-19-24)    | 129.9  | (18-19-21) | 90.4  |
| (18-19-24)   | 71.6   | (21-19-24)   | 58.6   | (18-20-21)   | 89.6   | (18-20-22) | 131.9 |
| (18-20-24)   | 82.1   | (21-20-22)   | 133.1  | (21-20-24)   | 68.2   | (22-20-24) | 128.5 |
| (19-21-20)   | 89.6   | (19-21-23)   | 131.9  | (19-21-24)   | 82.1   | (20-21-23) | 133.1 |
| (20-21-24)   | 68.2   | (23-21-24)   | 128.5  | (18-24-19)   | 36.9   | (18-24-20) | 39.3  |
| (18-24-21)   | 57.4   | (18-24-25)   | 93.9   | (18-24-27)   | 124.2  | (18-24-29) | 134.4 |
| (19-24-20)   | 57.4   | (19-24-21)   | 39.3   | (19-24-25)   | 124.2  | (19-24-27) | 93.9  |
| (19-24-29)   | 134.4  | (20-24-21)   | 43.6   | (20-24-25)   | 105.4  | (20-24-27) | 147.9 |
| (20-24-29)   | 95.3   | (21-24-25)   | 147.9  | (21-24-27)   | 105.4  | (21-24-29) | 95.3  |
| (25-24-27)   | 102.9  | (25-24-29)   | 96.4   | (27-24-29)   | 96.4   | (24-25-26) | 178.0 |
| (24-27-28)   | 178.0  | (24-29-30)   | 178.3  |              |        |            |       |
| (3-1-2-4)    | 0.0    | (3-1-2-6)    | -177.2 | (3-1-2-9)    | 56.6   |            |       |
| (5-1-2-4)    | 177.2  | (5-1-2-6)    | 0.0    | (5-1-2-9)    | -126.2 |            |       |
| (9-1-2-4)    | -56.6  | (9-1-2-6)    | 126.2  | (2-1-3-4)    | 0.0    |            |       |
| (2-1-3-7)    | 155.9  | (2-1-3-9)    | -68.0  | (5-1-3-4)    | -175.9 |            |       |
| (5-1-3-7)    | -20.0  | (5-1-3-9)    | 116.1  | (9-1-3-4)    | 68.0   |            |       |
| (9-1-3-7)    | -136.1 | (2-1-5-16)   | -174.6 | (2-1-5-18)   | -0.3   |            |       |
| (3-1-5-16)   | 0.5    | (3-1-5-18)   | 174.8  | (9-1-5-16)   | 91.9   |            |       |
| (9-1-5-18)   | -93.8  | (2-1-9-3)    | 102.2  | (2-1-9-4)    | 47.3   |            |       |
| (2-1-9-10)   | -148.1 | (2-1-9-11)   | -39.6  | (2-1-9-12)   | 109.1  |            |       |
| (3-1-9-2)    | -102.2 | (3-1-9-4)    | -54.9  | (3-1-9-10)   | 109.7  |            |       |
| (3-1-9-11)   | -141.8 | (3-1-9-12)   | 6.9    | (5-1-9-2)    | 118.9  |            |       |
| (5-1-9-3)    | -138.9 | (5-1-9-4)    | 166.2  | (5-1-9-10)   | -29.2  |            |       |
| (5-1-9-11)   | 79.3   | (5-1-9-12)   | -132.0 | (1-2-4-3)    | 0.0    |            |       |
| (1-2-4-8)    | -155.9 | (1-2-4-9)    | 68.0   | (6-2-4-3)    | 175.9  |            |       |
| (6-2-4-8)    | 20.0   | (6-2-4-9)    | -116.1 | (9-2-4-3)    | -68.0  |            |       |
| (9-2-4-8)    | 136.1  | (1-2-6-17)   | 174.6  | (1-2-6-19)   | 0.3    |            |       |
| (4-2-6-17)   | -0.5   | (4-2-6-19)   | -174.8 | (9-2-6-17)   | -91.9  |            |       |
| (9-2-6-19)   | 93.8   | (1-2-9-3)    | -47.3  | (1-2-9-4)    | -102.2 |            |       |
| (1-2-9-10)   | 39.6   | (1-2-9-11)   | 148.1  | (1-2-9-12)   | -109.1 |            |       |
| (4-2-9-1)    | 102.2  | (4-2-9-3)    | 54.9   | (4-2-9-10)   | 141.8  |            |       |
| (4-2-9-11)   | -109.7 | (4-2-9-12)   | -6.9   | (6-2-9-1)    | -118.9 |            |       |
| (6-2-9-3)    | -166.2 | (6-2-9-4)    | 138.9  | (6-2-9-10)   | -79.3  |            |       |
| (6-2-9-11)   | 29.2   | (6-2-9-12)   | 132.0  | (1-3-4-2)    | 0.0    |            |       |
| (1-3-4-8)    | 155.4  | (1-3-4-9)    | -81.6  | (7-3-4-2)    | -155.4 |            |       |
| (7-3-4-8)    | 0.0    | (7-3-4-9)    | 123.0  | (9-3-4-2)    | 81.6   |            |       |
| (9-3-4-8)    | -123.0 | (1-3-9-2)    | 44.1   | (1-3-9-4)    | 92.8   |            |       |
| (1-3-9-10)   | -77.0  | (1-3-9-11)   | 73.9   | (1-3-9-12)   | -175.1 |            |       |
| (4-3-9-1)    | -92.8  | (4-3-9-2)    | -48.7  | (4-3-9-10)   | -169.7 |            |       |
| (4-3-9-11)   | -18.8  | (4-3-9-12)   | 92.1   | (7-3-9-1)    | 138.7  |            |       |
| (7-3-9-2)    | -177.1 | (7-3-9-4)    | -128.5 | (7-3-9-10)   | 61.8   |            |       |
| (7-3-9-11)   | -147.3 | (7-3-9-12)   | -36.3  | (2-4-9-1)    | -44.1  |            |       |
| (2-4-9-3)    | -92.8  | (2-4-9-10)   | -73.9  | (2-4-9-11)   | 77.0   |            |       |
| (2-4-9-12)   | 175.1  | (3-4-9-1)    | 48.7   | (3-4-9-2)    | 92.8   |            |       |
| (3-4-9-10)   | 18.8   | (3-4-9-11)   | 169.7  | (3-4-9-12)   | -92.1  |            |       |
| (8-4-9-1)    | 177.1  | (8-4-9-2)    | -138.7 | (8-4-9-3)    | 128.5  |            |       |
| (8-4-9-10)   | 147.3  | (8-4-9-11)   | -61.8  | (8-4-9-12)   | 36.3   |            |       |
| (1-5-18-19)  | 0.3    | (1-5-18-20)  | -174.8 | (1-5-18-24)  | 93.8   |            |       |
| (16-5-18-19) | 174.6  | (16-5-18-20) | -0.5   | (16-5-18-24) | -91.9  |            |       |
| (2-6-19-18)  | -0.3   | (2-6-19-21)  | 174.8  | (2-6-19-24)  | -93.8  |            |       |
| (17-6-19-18) | -174.6 | (17-6-19-21) | 0.5    | (17-6-19-24) | 91.9   |            |       |
| (1-9-10-13)  | -78.5  | (2-9-10-13)  | -101.0 | (3-9-10-13)  | -40.3  |            |       |
| (4-9-10-13)  | -53.7  | (11-9-10-13) | 155.1  | (12-9-10-13) | 57.0   |            |       |
| (1-9-11-14)  | 101.0  | (2-9-11-14)  | 78.5   | (3-9-11-14)  | 53.7   |            |       |
| (4-9-11-14)  | 40.3   | (10-9-11-14) | -155.1 | (12-9-11-14) | -57.0  |            |       |
| (1-9-12-15)  | -26.3  | (2-9-12-15)  | 26.3   | (3-9-12-15)  | -21.9  |            |       |
| (4-9-12-15)  | 21.9   | (10-9-12-15) | -128.1 | (11-9-12-15) | 128.1  |            |       |
| (5-18-19-6)  | 0.0    | (5-18-19-21) | -177.2 | (5-18-19-24) | 126.2  |            |       |

|               |        |               |        |               |        |
|---------------|--------|---------------|--------|---------------|--------|
| (20-18-19-6)  | 177.2  | (20-18-19-21) | 0.0    | (20-18-19-24) | -56.6  |
| (24-18-19-6)  | -126.2 | (24-18-19-21) | 56.6   | (5-18-20-21)  | 175.9  |
| (5-18-20-22)  | 20.0   | (5-18-20-24)  | -116.1 | (19-18-20-21) | 0.0    |
| (19-18-20-22) | -155.9 | (19-18-20-24) | 68.0   | (24-18-20-21) | -68.0  |
| (24-18-20-22) | 136.1  | (5-18-24-19)  | -118.9 | (5-18-24-20)  | 138.9  |
| (5-18-24-21)  | -166.2 | (5-18-24-25)  | 29.2   | (5-18-24-27)  | -79.3  |
| (5-18-24-29)  | 132.0  | (19-18-24-20) | -102.2 | (19-18-24-21) | -47.3  |
| (19-18-24-25) | 148.1  | (19-18-24-27) | 39.6   | (19-18-24-29) | -109.1 |
| (20-18-24-19) | 102.2  | (20-18-24-21) | 54.9   | (20-18-24-25) | -109.7 |
| (20-18-24-27) | 141.8  | (20-18-24-29) | -6.9   | (6-19-21-20)  | -175.9 |
| (6-19-21-23)  | -20.0  | (6-19-21-24)  | 116.1  | (18-19-21-20) | 0.0    |
| (18-19-21-23) | 155.9  | (18-19-21-24) | -68.0  | (24-19-21-20) | 68.0   |
| (24-19-21-23) | -136.1 | (6-19-24-18)  | 118.9  | (6-19-24-20)  | 166.2  |
| (6-19-24-21)  | -138.9 | (6-19-24-25)  | 79.3   | (6-19-24-27)  | -29.2  |
| (6-19-24-29)  | -132.0 | (18-19-24-20) | 47.3   | (18-19-24-21) | 102.2  |
| (18-19-24-25) | -39.6  | (18-19-24-27) | -148.1 | (18-19-24-29) | 109.1  |
| (21-19-24-18) | -102.2 | (21-19-24-20) | -54.9  | (21-19-24-25) | -141.8 |
| (21-19-24-27) | 109.7  | (21-19-24-29) | 6.9    | (18-20-21-19) | 0.0    |
| (18-20-21-23) | -155.4 | (18-20-21-24) | 81.6   | (22-20-21-19) | 155.4  |
| (22-20-21-23) | 0.0    | (22-20-21-24) | -123.0 | (24-20-21-19) | -81.6  |
| (24-20-21-23) | 123.0  | (18-20-24-19) | -44.1  | (18-20-24-21) | -92.8  |
| (18-20-24-25) | 77.0   | (18-20-24-27) | -73.9  | (18-20-24-29) | 175.1  |
| (21-20-24-18) | 92.8   | (21-20-24-19) | 48.7   | (21-20-24-25) | 169.7  |
| (21-20-24-27) | 18.8   | (21-20-24-29) | -92.1  | (22-20-24-18) | -138.7 |
| (22-20-24-19) | 177.1  | (22-20-24-21) | 128.5  | (22-20-24-25) | -61.8  |
| (22-20-24-27) | 147.3  | (22-20-24-29) | 36.3   | (19-21-24-18) | 44.1   |
| (19-21-24-20) | 92.8   | (19-21-24-25) | 73.9   | (19-21-24-27) | -77.0  |
| (19-21-24-29) | -175.1 | (20-21-24-18) | -48.7  | (20-21-24-19) | -92.8  |
| (20-21-24-25) | -18.8  | (20-21-24-27) | -169.7 | (20-21-24-29) | 92.1   |
| (23-21-24-18) | -177.1 | (23-21-24-19) | 138.7  | (23-21-24-20) | -128.5 |
| (23-21-24-25) | -147.3 | (23-21-24-27) | 61.8   | (23-21-24-29) | -36.3  |
| (18-24-25-26) | 78.5   | (19-24-25-26) | 101.0  | (20-24-25-26) | 40.3   |
| (21-24-25-26) | 53.7   | (27-24-25-26) | -155.1 | (29-24-25-26) | -57.0  |
| (18-24-27-28) | -101.0 | (19-24-27-28) | -78.5  | (20-24-27-28) | -53.7  |
| (21-24-27-28) | -40.3  | (25-24-27-28) | 155.1  | (29-24-27-28) | 57.0   |
| (18-24-29-30) | 26.3   | (19-24-29-30) | -26.3  | (20-24-29-30) | 21.9   |
| (21-24-29-30) | -21.9  | (25-24-29-30) | 128.1  | (27-24-29-30) | -128.1 |

|                                  |        |        |        |        |        |        |        |        |        |        |
|----------------------------------|--------|--------|--------|--------|--------|--------|--------|--------|--------|--------|
| Frequencies (cm <sup>-1</sup> ): | 12.8   | 32.4   | 39.2   | 52.3   | 55.0   | 78.1   | 78.2   | 85.7   |        |        |
|                                  | 87.0   | 100.8  | 104.0  | 110.9  | 123.3  | 133.7  | 147.7  | 158.9  | 221.7  | 353.2  |
|                                  | 373.1  | 378.4  | 399.3  | 415.8  | 419.0  | 437.7  | 439.6  | 444.8  | 452.3  | 464.4  |
|                                  | 467.7  | 474.6  | 479.7  | 489.3  | 495.7  | 511.8  | 512.8  | 514.3  | 536.1  | 540.7  |
|                                  | 579.8  | 591.7  | 592.3  | 593.6  | 617.1  | 621.8  | 673.6  | 727.4  | 742.6  | 780.0  |
|                                  | 797.7  | 798.6  | 802.1  | 820.7  | 852.1  | 857.3  | 868.8  | 881.4  | 986.4  | 987.5  |
|                                  | 1039.1 | 1096.2 | 1133.0 | 1206.2 | 1213.3 | 1238.1 | 1247.8 | 1263.9 | 1301.0 | 1370.1 |
|                                  | 1470.4 | 1473.8 | 1578.7 | 1585.0 | 2079.9 | 2082.4 | 2089.2 | 2100.5 | 2116.7 | 2145.4 |
|                                  | 3213.5 | 3213.8 | 3258.0 | 3258.2 | 3271.9 | 3272.1 |        |        |        |        |

(12 *trans*) B3LYP/6-31G(d)+LANL2DZ C<sub>2h</sub> Geometry

|                                         |                |          |
|-----------------------------------------|----------------|----------|
| Nuclear repulsion energy                | 2061.17944744  | Hartrees |
| B3LYP/6-31G(d)+LANL2DZ energy           | -1235.28512497 | Hartrees |
| Zero-point energy correction            | 0.162781       | Hartrees |
| Thermal correction to Enthalpy          | 0.186063       | Hartrees |
| Thermal correction to Gibbs Free Energy | 0.108018       | Hartrees |

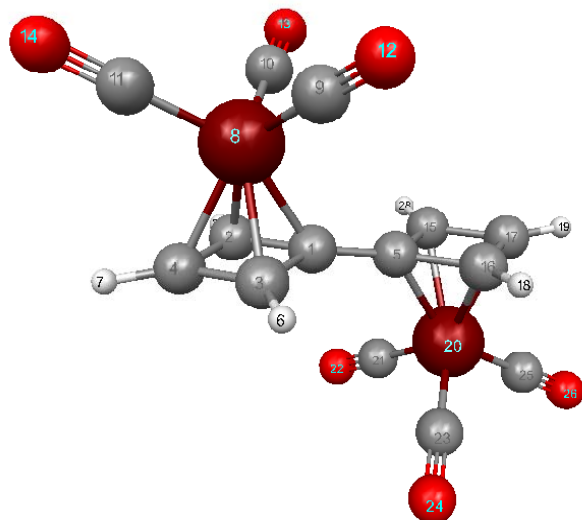

|      | X         | Y         | Z         |
|------|-----------|-----------|-----------|
| C1   | 0.423076  | 0.582631  | 0.000000  |
| C2   | 1.196431  | 1.294002  | 1.027071  |
| C3   | 1.196431  | 1.294002  | -1.027071 |
| C4   | 1.950031  | 1.964692  | 0.000000  |
| C5   | -0.423076 | -0.582631 | 0.000000  |
| H6   | 1.276643  | 1.220167  | -2.102783 |
| H7   | 2.777200  | 2.661201  | 0.000000  |
| Fe8  | -0.042381 | 2.573949  | 0.000000  |
| C9   | -1.196431 | 2.654954  | -1.351194 |
| C10  | -1.196431 | 2.654954  | 1.351194  |
| C11  | 0.469678  | 4.286608  | 0.000000  |
| O12  | -1.937240 | 2.672025  | -2.234317 |
| O13  | -1.937240 | 2.672025  | 2.234317  |
| O14  | 0.799531  | 5.391040  | 0.000000  |
| C15  | -1.196431 | -1.294002 | 1.027071  |
| C16  | -1.196431 | -1.294002 | -1.027071 |
| C17  | -1.950031 | -1.964692 | 0.000000  |
| H18  | -1.276643 | -1.220167 | -2.102783 |
| H19  | -2.777200 | -2.661201 | 0.000000  |
| Fe20 | 0.042381  | -2.573949 | 0.000000  |
| C21  | 1.196431  | -2.654954 | 1.351194  |
| O22  | 1.937240  | -2.672025 | 2.234317  |
| C23  | 1.196431  | -2.654954 | -1.351194 |
| O24  | 1.937240  | -2.672025 | -2.234317 |
| C25  | -0.469678 | -4.286608 | 0.000000  |
| O26  | -0.799531 | -5.391040 | 0.000000  |
| H27  | 1.276643  | 1.220167  | 2.102783  |
| H28  | -1.276643 | -1.220167 | 2.102783  |

|            |       |            |       |            |       |            |       |         |       |
|------------|-------|------------|-------|------------|-------|------------|-------|---------|-------|
| (1-2)      | 1.469 | (1-3)      | 1.469 | (1-5)      | 1.440 | (1-8)      | 2.045 | (2-4)   | 1.440 |
| (2-8)      | 2.056 | (2-27)     | 1.081 | (3-4)      | 1.440 | (3-6)      | 1.081 | (3-8)   | 2.056 |
| (4-7)      | 1.081 | (4-8)      | 2.083 | (5-15)     | 1.469 | (5-16)     | 1.469 | (5-20)  | 2.045 |
| (8-9)      | 1.779 | (8-10)     | 1.779 | (8-11)     | 1.788 | (9-12)     | 1.153 | (10-13) | 1.153 |
| (11-14)    | 1.153 | (15-17)    | 1.440 | (15-20)    | 2.056 | (15-28)    | 1.081 | (16-17) | 1.440 |
| (16-18)    | 1.081 | (16-20)    | 2.056 | (17-19)    | 1.081 | (17-20)    | 2.083 | (20-21) | 1.779 |
| (20-23)    | 1.779 | (20-25)    | 1.788 | (21-22)    | 1.153 | (23-24)    | 1.153 | (25-26) | 1.153 |
| (2-1-3)    | 88.7  | (2-1-5)    | 134.5 | (2-1-8)    | 69.4  | (3-1-5)    | 134.5 |         |       |
| (3-1-8)    | 69.4  | (5-1-8)    | 130.9 | (1-2-4)    | 90.1  | (1-2-8)    | 68.6  |         |       |
| (1-2-27)   | 134.5 | (4-2-8)    | 70.7  | (4-2-27)   | 134.6 | (8-2-27)   | 125.7 |         |       |
| (1-3-4)    | 90.1  | (1-3-6)    | 134.5 | (1-3-8)    | 68.6  | (4-3-6)    | 134.6 |         |       |
| (4-3-8)    | 70.7  | (6-3-8)    | 125.7 | (2-4-3)    | 91.0  | (2-4-7)    | 134.5 |         |       |
| (2-4-8)    | 68.6  | (3-4-7)    | 134.5 | (3-4-8)    | 68.6  | (7-4-8)    | 122.9 |         |       |
| (1-5-15)   | 134.5 | (1-5-16)   | 134.5 | (1-5-20)   | 130.9 | (15-5-16)  | 88.7  |         |       |
| (15-5-20)  | 69.4  | (16-5-20)  | 69.4  | (1-8-2)    | 42.0  | (1-8-3)    | 42.0  |         |       |
| (1-8-4)    | 59.8  | (1-8-9)    | 101.1 | (1-8-10)   | 101.1 | (1-8-11)   | 150.2 |         |       |
| (2-8-3)    | 59.9  | (2-8-4)    | 40.7  | (2-8-9)    | 143.0 | (2-8-10)   | 92.3  |         |       |
| (2-8-11)   | 115.1 | (3-8-4)    | 40.7  | (3-8-9)    | 92.3  | (3-8-10)   | 143.0 |         |       |
| (3-8-11)   | 115.1 | (4-8-9)    | 129.3 | (4-8-10)   | 129.3 | (4-8-11)   | 90.4  |         |       |
| (9-8-10)   | 98.9  | (9-8-11)   | 98.2  | (10-8-11)  | 98.2  | (8-9-12)   | 178.2 |         |       |
| (8-10-13)  | 178.2 | (8-11-14)  | 180.0 | (5-15-17)  | 90.1  | (5-15-20)  | 68.6  |         |       |
| (5-15-28)  | 134.5 | (17-15-20) | 70.7  | (17-15-28) | 134.6 | (20-15-28) | 125.7 |         |       |
| (5-16-17)  | 90.1  | (5-16-18)  | 134.5 | (5-16-20)  | 68.6  | (17-16-18) | 134.6 |         |       |
| (17-16-20) | 70.7  | (18-16-20) | 125.7 | (15-17-16) | 91.0  | (15-17-19) | 134.5 |         |       |
| (15-17-20) | 68.6  | (16-17-19) | 134.5 | (16-17-20) | 68.6  | (19-17-20) | 122.9 |         |       |
| (5-20-15)  | 42.0  | (5-20-16)  | 42.0  | (5-20-17)  | 59.8  | (5-20-21)  | 101.1 |         |       |
| (5-20-23)  | 101.1 | (5-20-25)  | 150.2 | (15-20-16) | 59.9  | (15-20-17) | 40.7  |         |       |
| (15-20-21) | 92.3  | (15-20-23) | 143.0 | (15-20-25) | 115.1 | (16-20-17) | 40.7  |         |       |
| (16-20-21) | 143.0 | (16-20-23) | 92.3  | (16-20-25) | 115.1 | (17-20-21) | 129.3 |         |       |
| (17-20-23) | 129.3 | (17-20-25) | 90.4  | (21-20-23) | 98.9  | (21-20-25) | 98.2  |         |       |
| (23-20-25) | 98.2  | (20-21-22) | 178.2 | (20-23-24) | 178.2 | (20-25-26) | 180.0 |         |       |

|               |        |               |        |               |        |
|---------------|--------|---------------|--------|---------------|--------|
| (3-1-2-4)     | -0.7   | (3-1-2-8)     | 68.5   | (3-1-2-27)    | -171.9 |
| (5-1-2-4)     | 163.2  | (5-1-2-8)     | -127.6 | (5-1-2-27)    | -8.0   |
| (8-1-2-4)     | -69.1  | (8-1-2-27)    | 119.6  | (2-1-3-4)     | 0.7    |
| (2-1-3-6)     | 171.9  | (2-1-3-8)     | -68.5  | (5-1-3-4)     | -163.2 |
| (5-1-3-6)     | 8.0    | (5-1-3-8)     | 127.6  | (8-1-3-4)     | 69.1   |
| (8-1-3-6)     | -119.6 | (2-1-5-15)    | 22.9   | (2-1-5-16)    | 180.0  |
| (2-1-5-20)    | -78.6  | (3-1-5-15)    | 180.0  | (3-1-5-16)    | -22.9  |
| (3-1-5-20)    | 78.6   | (8-1-5-15)    | -78.6  | (8-1-5-16)    | 78.6   |
| (8-1-5-20)    | 180.0  | (2-1-8-3)     | 96.6   | (2-1-8-4)     | 48.3   |
| (2-1-8-9)     | 177.6  | (2-1-8-10)    | -81.0  | (2-1-8-11)    | 48.3   |
| (3-1-8-2)     | -96.6  | (3-1-8-4)     | -48.3  | (3-1-8-9)     | 81.0   |
| (3-1-8-10)    | -177.6 | (3-1-8-11)    | -48.3  | (5-1-8-2)     | 131.7  |
| (5-1-8-3)     | -131.7 | (5-1-8-4)     | 180.0  | (5-1-8-9)     | -50.7  |
| (5-1-8-10)    | 50.7   | (5-1-8-11)    | 180.0  | (1-2-4-3)     | 0.7    |
| (1-2-4-7)     | -177.1 | (1-2-4-8)     | 67.2   | (8-2-4-3)     | -66.5  |
| (8-2-4-7)     | 115.7  | (27-2-4-3)    | 171.9  | (27-2-4-7)    | -5.9   |
| (27-2-4-8)    | -121.6 | (1-2-8-3)     | -50.2  | (1-2-8-4)     | -98.1  |
| (1-2-8-9)     | -3.9   | (1-2-8-10)    | 104.1  | (1-2-8-11)    | -155.8 |
| (4-2-8-1)     | 98.1   | (4-2-8-3)     | 47.9   | (4-2-8-9)     | 94.1   |
| (4-2-8-10)    | -157.9 | (4-2-8-11)    | -57.8  | (27-2-8-1)    | -130.3 |
| (27-2-8-3)    | 179.6  | (27-2-8-4)    | 131.7  | (27-2-8-9)    | -134.2 |
| (27-2-8-10)   | -26.2  | (27-2-8-11)   | 73.9   | (1-3-4-2)     | -0.7   |
| (1-3-4-7)     | 177.1  | (1-3-4-8)     | -67.2  | (6-3-4-2)     | -171.9 |
| (6-3-4-7)     | 5.9    | (6-3-4-8)     | 121.6  | (8-3-4-2)     | 66.5   |
| (8-3-4-7)     | -115.7 | (1-3-8-2)     | 50.2   | (1-3-8-4)     | 98.1   |
| (1-3-8-9)     | -104.1 | (1-3-8-10)    | 3.9    | (1-3-8-11)    | 155.8  |
| (4-3-8-1)     | -98.1  | (4-3-8-2)     | -47.9  | (4-3-8-9)     | 157.9  |
| (4-3-8-10)    | -94.1  | (4-3-8-11)    | 57.8   | (6-3-8-1)     | 130.3  |
| (6-3-8-2)     | -179.6 | (6-3-8-4)     | -131.7 | (6-3-8-9)     | 26.2   |
| (6-3-8-10)    | 134.2  | (6-3-8-11)    | -73.9  | (2-4-8-1)     | -50.0  |
| (2-4-8-3)     | -100.0 | (2-4-8-9)     | -129.1 | (2-4-8-10)    | 29.1   |
| (2-4-8-11)    | 130.0  | (3-4-8-1)     | 50.0   | (3-4-8-2)     | 100.0  |
| (3-4-8-9)     | -29.1  | (3-4-8-10)    | 129.1  | (3-4-8-11)    | -130.0 |
| (7-4-8-1)     | 180.0  | (7-4-8-2)     | -130.0 | (7-4-8-3)     | 130.0  |
| (7-4-8-9)     | 100.9  | (7-4-8-10)    | -100.9 | (7-4-8-11)    | 0.0    |
| (1-5-15-17)   | 163.2  | (1-5-15-20)   | -127.6 | (1-5-15-28)   | -8.0   |
| (16-5-15-17)  | -0.7   | (16-5-15-20)  | 68.5   | (16-5-15-28)  | -171.9 |
| (20-5-15-17)  | -69.1  | (20-5-15-28)  | 119.6  | (1-5-16-17)   | -163.2 |
| (1-5-16-18)   | 8.0    | (1-5-16-20)   | 127.6  | (15-5-16-17)  | 0.7    |
| (15-5-16-18)  | 171.9  | (15-5-16-20)  | -68.5  | (20-5-16-17)  | 69.1   |
| (20-5-16-18)  | -119.6 | (1-5-20-15)   | 131.7  | (1-5-20-16)   | -131.7 |
| (1-5-20-17)   | 180.0  | (1-5-20-21)   | 50.7   | (1-5-20-23)   | -50.7  |
| (1-5-20-25)   | 180.0  | (15-5-20-16)  | 96.6   | (15-5-20-17)  | 48.3   |
| (15-5-20-21)  | -81.0  | (15-5-20-23)  | 177.6  | (15-5-20-25)  | 48.3   |
| (16-5-20-15)  | -96.6  | (16-5-20-17)  | -48.3  | (16-5-20-21)  | -177.6 |
| (16-5-20-23)  | 81.0   | (16-5-20-25)  | -48.3  | (1-8-9-12)    | -6.0   |
| (2-8-9-12)    | -3.3   | (3-8-9-12)    | 35.4   | (4-8-9-12)    | 53.9   |
| (10-8-9-12)   | -109.2 | (11-8-9-12)   | 151.2  | (1-8-10-13)   | 6.0    |
| (2-8-10-13)   | -35.4  | (3-8-10-13)   | 3.3    | (4-8-10-13)   | -53.9  |
| (9-8-10-13)   | 109.2  | (11-8-10-13)  | -151.2 | (1-8-11-14)   | 180.0  |
| (2-8-11-14)   | -146.5 | (3-8-11-14)   | 146.5  | (4-8-11-14)   | 180.0  |
| (9-8-11-14)   | 50.1   | (10-8-11-14)  | -50.1  | (5-15-17-16)  | 0.7    |
| (5-15-17-19)  | -177.1 | (5-15-17-20)  | 67.2   | (20-15-17-16) | -66.5  |
| (20-15-17-19) | 115.7  | (28-15-17-16) | 171.9  | (28-15-17-19) | -5.9   |
| (28-15-17-20) | -121.6 | (5-15-20-16)  | -50.2  | (5-15-20-17)  | -98.1  |
| (5-15-20-21)  | 104.1  | (5-15-20-23)  | -3.9   | (5-15-20-25)  | -155.8 |
| (17-15-20-5)  | 98.1   | (17-15-20-16) | 47.9   | (17-15-20-21) | -157.9 |
| (17-15-20-23) | 94.1   | (17-15-20-25) | -57.8  | (28-15-20-5)  | -130.3 |
| (28-15-20-16) | 179.6  | (28-15-20-17) | 131.7  | (28-15-20-21) | -26.2  |
| (28-15-20-23) | -134.2 | (28-15-20-25) | 73.9   | (5-16-17-15)  | -0.7   |
| (5-16-17-19)  | 177.1  | (5-16-17-20)  | -67.2  | (18-16-17-15) | -171.9 |
| (18-16-17-19) | 5.9    | (18-16-17-20) | 121.6  | (20-16-17-15) | 66.5   |

|               |        |               |        |               |        |
|---------------|--------|---------------|--------|---------------|--------|
| (20-16-17-19) | -115.7 | (5-16-20-15)  | 50.2   | (5-16-20-17)  | 98.1   |
| (5-16-20-21)  | 3.9    | (5-16-20-23)  | -104.1 | (5-16-20-25)  | 155.8  |
| (17-16-20-5)  | -98.1  | (17-16-20-15) | -47.9  | (17-16-20-21) | -94.1  |
| (17-16-20-23) | 157.9  | (17-16-20-25) | 57.8   | (18-16-20-5)  | 130.3  |
| (18-16-20-15) | -179.6 | (18-16-20-17) | -131.7 | (18-16-20-21) | 134.2  |
| (18-16-20-23) | 26.2   | (18-16-20-25) | -73.9  | (15-17-20-5)  | -50.0  |
| (15-17-20-16) | -100.0 | (15-17-20-21) | 29.1   | (15-17-20-23) | -129.1 |
| (15-17-20-25) | 130.0  | (16-17-20-5)  | 50.0   | (16-17-20-15) | 100.0  |
| (16-17-20-21) | 129.1  | (16-17-20-23) | -29.1  | (16-17-20-25) | -130.0 |
| (19-17-20-5)  | 180.0  | (19-17-20-15) | -130.0 | (19-17-20-16) | 130.0  |
| (19-17-20-21) | -100.9 | (19-17-20-23) | 100.9  | (19-17-20-25) | 0.0    |
| (5-20-21-22)  | 6.0    | (15-20-21-22) | -35.4  | (16-20-21-22) | 3.3    |
| (17-20-21-22) | -53.9  | (23-20-21-22) | 109.2  | (25-20-21-22) | -151.2 |
| (5-20-23-24)  | -6.0   | (15-20-23-24) | -3.3   | (16-20-23-24) | 35.4   |
| (17-20-23-24) | 53.9   | (21-20-23-24) | -109.2 | (25-20-23-24) | 151.2  |
| (5-20-25-26)  | 180.0  | (15-20-25-26) | -146.5 | (16-20-25-26) | 146.5  |
| (17-20-25-26) | 180.0  | (21-20-25-26) | -50.1  | (23-20-25-26) | 50.1   |

| Frequencies (cm <sup>-1</sup> ): | 15.6   | 19.8   | 20.7   | 35.7   | 64.7   | 85.9   | 86.6   | 88.1   |        |        |
|----------------------------------|--------|--------|--------|--------|--------|--------|--------|--------|--------|--------|
|                                  | 91.5   | 105.2  | 110.4  | 132.0  | 134.7  | 146.3  | 150.1  | 160.9  | 335.9  | 348.8  |
|                                  | 356.5  | 358.0  | 401.3  | 410.0  | 413.4  | 416.5  | 461.3  | 463.9  | 472.5  | 475.7  |
|                                  | 491.6  | 492.5  | 510.0  | 516.8  | 517.5  | 517.8  | 521.4  | 534.8  | 597.3  | 598.3  |
|                                  | 602.7  | 606.3  | 619.1  | 623.1  | 628.2  | 657.8  | 761.4  | 764.3  | 822.5  | 824.7  |
|                                  | 838.9  | 839.8  | 940.0  | 945.1  | 972.1  | 986.3  | 989.0  | 1073.0 | 1105.4 | 1162.1 |
|                                  | 1213.2 | 1215.9 | 1280.2 | 1338.7 | 1365.2 | 1369.9 | 1387.2 | 1582.5 | 2085.1 | 2085.3 |
|                                  | 2085.4 | 2087.5 | 2122.7 | 2136.9 | 3266.4 | 3266.9 | 3278.5 | 3279.6 | 3291.5 | 3292.3 |

(12 *gauche*) B3LYP/6-31G(d)+LANL2DZ C<sub>2</sub> Geometry

|                                         |                |          |
|-----------------------------------------|----------------|----------|
| Nuclear repulsion energy                | 2124.16113417  | Hartrees |
| B3LYP/6-31G(d)+LANL2DZ energy           | -1235.28285916 | Hartrees |
| Zero-point energy correction            | 0.162864       | Hartrees |
| Thermal correction to Enthalpy          | 0.185992       | Hartrees |
| Thermal correction to Gibbs Free Energy | 0.109387       | Hartrees |

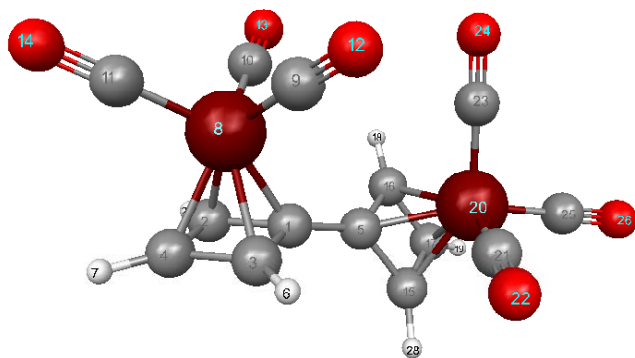

|      | X         | Y         | Z         |
|------|-----------|-----------|-----------|
| C1   | -0.228417 | 0.688636  | -1.293465 |
| C2   | 0.228417  | 1.903864  | -2.000986 |
| C3   | -1.525522 | 1.338102  | -1.093042 |
| C4   | -1.062676 | 2.510889  | -1.783199 |
| C5   | 0.228417  | -0.688636 | -1.293465 |
| H6   | -2.472440 | 1.022924  | -0.676354 |
| H7   | -1.514983 | 3.453257  | -2.060632 |
| Fe8  | -0.015154 | 2.240618  | -0.003213 |
| C9   | -0.719544 | 1.659538  | 1.529556  |
| C10  | 1.705865  | 2.010562  | 0.374140  |
| C11  | -0.115453 | 3.993090  | 0.332795  |
| O12  | -1.183607 | 1.261949  | 2.505982  |
| O13  | 2.826024  | 1.837269  | 0.586897  |
| O14  | -0.171618 | 5.126397  | 0.534630  |
| C15  | -0.228417 | -1.903864 | -2.000986 |
| C16  | 1.525522  | -1.338102 | -1.093042 |
| C17  | 1.062676  | -2.510889 | -1.783199 |
| H18  | 2.472440  | -1.022924 | -0.676354 |
| H19  | 1.514983  | -3.453257 | -2.060632 |
| Fe20 | 0.015154  | -2.240618 | -0.003213 |
| C21  | -1.705865 | -2.010562 | 0.374140  |
| O22  | -2.826024 | -1.837269 | 0.586897  |
| C23  | 0.719544  | -1.659538 | 1.529556  |
| O24  | 1.183607  | -1.261949 | 2.505982  |



|             |        |             |       |            |            |            |           |           |       |
|-------------|--------|-------------|-------|------------|------------|------------|-----------|-----------|-------|
|             |        |             |       |            | C25        | 0.115453   | -3.993090 | 0.332795  |       |
|             |        |             |       |            | O26        | 0.171618   | -5.126397 | 0.534630  |       |
|             |        |             |       |            | H27        | 1.097960   | 2.149836  | -2.594329 |       |
|             |        |             |       |            | H28        | -1.097960  | -2.149836 | -2.594329 |       |
| (1-2)       | 1.479  | (1-3)       | 1.464 | (1-5)      | 1.451      | (1-8)      | 2.030     | (2-4)     | 1.443 |
| (2-8)       | 2.041  | (2-27)      | 1.081 | (3-4)      | 1.437      | (3-6)      | 1.081     | (3-8)     | 2.070 |
| (4-7)       | 1.081  | (4-8)       | 2.083 | (5-15)     | 1.479      | (5-16)     | 1.464     | (5-20)    | 2.030 |
| (8-9)       | 1.784  | (8-10)      | 1.777 | (8-11)     | 1.787      | (9-12)     | 1.152     | (10-13)   | 1.153 |
| (11-14)     | 1.153  | (15-17)     | 1.443 | (15-20)    | 2.041      | (15-28)    | 1.081     | (16-17)   | 1.437 |
| (16-18)     | 1.081  | (16-20)     | 2.070 | (17-19)    | 1.081      | (17-20)    | 2.083     | (20-21)   | 1.777 |
| (20-23)     | 1.784  | (20-25)     | 1.787 | (21-22)    | 1.153      | (23-24)    | 1.152     | (25-26)   | 1.153 |
| (2-1-3)     | 88.5   | (2-1-5)     | 133.1 | (2-1-8)    | 69.1       | (3-1-5)    | 134.4     |           |       |
| (3-1-8)     | 70.5   | (5-1-8)     | 133.8 | (1-2-4)    | 89.8       | (1-2-8)    | 68.3      |           |       |
| (1-2-27)    | 134.3  | (4-2-8)     | 71.1  | (4-2-27)   | 135.0      | (8-2-27)   | 126.6     |           |       |
| (1-3-4)     | 90.6   | (1-3-6)     | 134.3 | (1-3-8)    | 67.6       | (4-3-6)    | 134.8     |           |       |
| (4-3-8)     | 70.2   | (6-3-8)     | 124.3 | (2-4-3)    | 91.0       | (2-4-7)    | 134.6     |           |       |
| (2-4-8)     | 67.9   | (3-4-7)     | 134.4 | (3-4-8)    | 69.3       | (7-4-8)    | 122.9     |           |       |
| (1-5-15)    | 133.1  | (1-5-16)    | 134.4 | (1-5-20)   | 133.8      | (15-5-16)  | 88.5      |           |       |
| (15-5-20)   | 69.1   | (16-5-20)   | 70.5  | (1-8-2)    | 42.6       | (1-8-3)    | 41.8      |           |       |
| (1-8-4)     | 60.2   | (1-8-9)     | 104.8 | (1-8-10)   | 97.9       | (1-8-11)   | 149.7     |           |       |
| (2-8-3)     | 60.0   | (2-8-4)     | 41.0  | (2-8-9)    | 146.6      | (2-8-10)   | 94.1      |           |       |
| (2-8-11)    | 110.6  | (3-8-4)     | 40.5  | (3-8-9)    | 91.3       | (3-8-10)   | 139.7     |           |       |
| (3-8-11)    | 119.1  | (4-8-9)     | 125.3 | (4-8-10)   | 133.3      | (4-8-11)   | 90.3      |           |       |
| (9-8-10)    | 99.1   | (9-8-11)    | 97.8  | (10-8-11)  | 98.1       | (8-9-12)   | 178.6     |           |       |
| (8-10-13)   | 178.0  | (8-11-14)   | 179.1 | (5-15-17)  | 89.8       | (5-15-20)  | 68.3      |           |       |
| (5-15-28)   | 134.3  | (17-15-20)  | 71.1  | (17-15-28) | 135.0      | (20-15-28) | 126.6     |           |       |
| (5-16-17)   | 90.6   | (5-16-18)   | 134.3 | (5-16-20)  | 67.6       | (17-16-18) | 134.8     |           |       |
| (17-16-20)  | 70.2   | (18-16-20)  | 124.3 | (15-17-16) | 91.0       | (15-17-19) | 134.6     |           |       |
| (15-17-20)  | 67.9   | (16-17-19)  | 134.4 | (16-17-20) | 69.3       | (19-17-20) | 122.9     |           |       |
| (5-20-15)   | 42.6   | (5-20-16)   | 41.8  | (5-20-17)  | 60.2       | (5-20-21)  | 97.9      |           |       |
| (5-20-23)   | 104.8  | (5-20-25)   | 149.7 | (15-20-16) | 60.0       | (15-20-17) | 41.0      |           |       |
| (15-20-21)  | 94.1   | (15-20-23)  | 146.6 | (15-20-25) | 110.6      | (16-20-17) | 40.5      |           |       |
| (16-20-21)  | 139.7  | (16-20-23)  | 91.3  | (16-20-25) | 119.1      | (17-20-21) | 133.3     |           |       |
| (17-20-23)  | 125.3  | (17-20-25)  | 90.3  | (21-20-23) | 99.1       | (21-20-25) | 98.1      |           |       |
| (23-20-25)  | 97.8   | (20-21-22)  | 178.0 | (20-23-24) | 178.6      | (20-25-26) | 179.1     |           |       |
| (3-1-2-4)   | 0.0    | (3-1-2-8)   |       | 69.7       | (3-1-2-27) | -169.8     |           |           |       |
| (5-1-2-4)   | 159.2  | (5-1-2-8)   |       | -131.2     | (5-1-2-27) | -10.6      |           |           |       |
| (8-1-2-4)   | -69.7  | (8-1-2-27)  |       | 120.5      | (2-1-3-4)  | 0.0        |           |           |       |
| (2-1-3-6)   | 175.0  | (2-1-3-8)   |       | -68.3      | (5-1-3-4)  | -158.7     |           |           |       |
| (5-1-3-6)   | 16.4   | (5-1-3-8)   |       | 133.0      | (8-1-3-4)  | 68.3       |           |           |       |
| (8-1-3-6)   | -116.7 | (2-1-5-15)  |       | -98.2      | (2-1-5-16) | 52.0       |           |           |       |
| (2-1-5-20)  | 159.1  | (3-1-5-15)  |       | 52.0       | (3-1-5-16) | -157.9     |           |           |       |
| (3-1-5-20)  | -50.8  | (8-1-5-15)  |       | 159.1      | (8-1-5-16) | -50.8      |           |           |       |
| (8-1-5-20)  | 56.3   | (2-1-8-3)   |       | 96.1       | (2-1-8-4)  | 48.5       |           |           |       |
| (2-1-8-9)   | 171.0  | (2-1-8-10)  |       | -87.4      | (2-1-8-11) | 34.0       |           |           |       |
| (3-1-8-2)   | -96.1  | (3-1-8-4)   |       | -47.6      | (3-1-8-9)  | 74.9       |           |           |       |
| (3-1-8-10)  | 176.5  | (3-1-8-11)  |       | -62.1      | (5-1-8-2)  | 130.3      |           |           |       |
| (5-1-8-3)   | -133.6 | (5-1-8-4)   |       | 178.8      | (5-1-8-9)  | -58.7      |           |           |       |
| (5-1-8-10)  | 42.9   | (5-1-8-11)  |       | 164.3      | (1-2-4-3)  | 0.0        |           |           |       |
| (1-2-4-7)   | -177.9 | (1-2-4-8)   |       | 67.1       | (8-2-4-3)  | -67.1      |           |           |       |
| (8-2-4-7)   | 115.0  | (27-2-4-3)  |       | 169.7      | (27-2-4-7) | -8.2       |           |           |       |
| (27-2-4-8)  | -123.2 | (1-2-8-3)   |       | -50.0      | (1-2-8-4)  | -97.6      |           |           |       |
| (1-2-8-9)   | -16.0  | (1-2-8-10)  |       | 97.3       | (1-2-8-11) | -162.5     |           |           |       |
| (4-2-8-1)   | 97.6   | (4-2-8-3)   |       | 47.6       | (4-2-8-9)  | 81.7       |           |           |       |
| (4-2-8-10)  | -165.1 | (4-2-8-11)  |       | -64.8      | (27-2-8-1) | -129.8     |           |           |       |
| (27-2-8-3)  | -179.8 | (27-2-8-4)  |       | 132.5      | (27-2-8-9) | -145.8     |           |           |       |
| (27-2-8-10) | -32.5  | (27-2-8-11) |       | 67.7       | (1-3-4-2)  | 0.0        |           |           |       |
| (1-3-4-7)   | 177.9  | (1-3-4-8)   |       | -65.9      | (6-3-4-2)  | -175.0     |           |           |       |
| (6-3-4-7)   | 2.9    | (6-3-4-8)   |       | 119.1      | (8-3-4-2)  | 65.9       |           |           |       |
| (8-3-4-7)   | -116.2 | (1-3-8-2)   |       | 51.0       | (1-3-8-4)  | 99.2       |           |           |       |



|               |        |               |        |               |        |
|---------------|--------|---------------|--------|---------------|--------|
| (1-3-8-9)     | -111.0 | (1-3-8-10)    | -5.3   | (1-3-8-11)    | 149.3  |
| (4-3-8-1)     | -99.2  | (4-3-8-2)     | -48.2  | (4-3-8-9)     | 149.8  |
| (4-3-8-10)    | -104.6 | (4-3-8-11)    | 50.1   | (6-3-8-1)     | 129.4  |
| (6-3-8-2)     | -179.6 | (6-3-8-4)     | -131.4 | (6-3-8-9)     | 18.4   |
| (6-3-8-10)    | 124.0  | (6-3-8-11)    | -81.3  | (2-4-8-1)     | -50.6  |
| (2-4-8-3)     | -100.0 | (2-4-8-9)     | -138.1 | (2-4-8-10)    | 20.7   |
| (2-4-8-11)    | 122.1  | (3-4-8-1)     | 49.4   | (3-4-8-2)     | 100.0  |
| (3-4-8-9)     | -38.1  | (3-4-8-10)    | 120.6  | (3-4-8-11)    | -137.9 |
| (7-4-8-1)     | 179.6  | (7-4-8-2)     | -129.8 | (7-4-8-3)     | 130.2  |
| (7-4-8-9)     | 92.1   | (7-4-8-10)    | -109.1 | (7-4-8-11)    | -7.7   |
| (1-5-15-17)   | 159.2  | (1-5-15-20)   | -131.2 | (1-5-15-28)   | -10.6  |
| (16-5-15-17)  | 0.0    | (16-5-15-20)  | 69.7   | (16-5-15-28)  | -169.8 |
| (20-5-15-17)  | -69.7  | (20-5-15-28)  | 120.5  | (1-5-16-17)   | -158.7 |
| (1-5-16-18)   | 16.4   | (1-5-16-20)   | 133.0  | (15-5-16-17)  | 0.0    |
| (15-5-16-18)  | 175.0  | (15-5-16-20)  | -68.3  | (20-5-16-17)  | 68.3   |
| (20-5-16-18)  | -116.7 | (1-5-20-15)   | 130.3  | (1-5-20-16)   | -133.6 |
| (1-5-20-17)   | 178.8  | (1-5-20-21)   | 42.9   | (1-5-20-23)   | -58.7  |
| (1-5-20-25)   | 164.3  | (15-5-20-16)  | 96.1   | (15-5-20-17)  | 48.5   |
| (15-5-20-21)  | -87.4  | (15-5-20-23)  | 171.0  | (15-5-20-25)  | 34.0   |
| (16-5-20-15)  | -96.1  | (16-5-20-17)  | -47.6  | (16-5-20-21)  | 176.5  |
| (16-5-20-23)  | 74.9   | (16-5-20-25)  | -62.1  | (1-8-9-12)    | -8.4   |
| (2-8-9-12)    | 2.7    | (3-8-9-12)    | 31.7   | (4-8-9-12)    | 55.3   |
| (10-8-9-12)   | -109.1 | (11-8-9-12)   | 151.3  | (1-8-10-13)   | 15.7   |
| (2-8-10-13)   | -27.0  | (3-8-10-13)   | 19.3   | (4-8-10-13)   | -40.4  |
| (9-8-10-13)   | 122.2  | (11-8-10-13)  | -138.5 | (1-8-11-14)   | -47.1  |
| (2-8-11-14)   | -23.2  | (3-8-11-14)   | -89.5  | (4-8-11-14)   | -59.6  |
| (9-8-11-14)   | 174.7  | (10-8-11-14)  | 74.3   | (5-15-17-16)  | 0.0    |
| (5-15-17-19)  | -177.9 | (5-15-17-20)  | 67.1   | (20-15-17-16) | -67.1  |
| (20-15-17-19) | 115.0  | (28-15-17-16) | 169.7  | (28-15-17-19) | -8.2   |
| (28-15-17-20) | -123.2 | (5-15-20-16)  | -50.0  | (5-15-20-17)  | -97.6  |
| (5-15-20-21)  | 97.3   | (5-15-20-23)  | -16.0  | (5-15-20-25)  | -162.5 |
| (17-15-20-5)  | 97.6   | (17-15-20-16) | 47.6   | (17-15-20-21) | -165.1 |
| (17-15-20-23) | 81.7   | (17-15-20-25) | -64.8  | (28-15-20-5)  | -129.8 |
| (28-15-20-16) | -179.8 | (28-15-20-17) | 132.5  | (28-15-20-21) | -32.5  |
| (28-15-20-23) | -145.8 | (28-15-20-25) | 67.7   | (5-16-17-15)  | 0.0    |
| (5-16-17-19)  | 177.9  | (5-16-17-20)  | -65.9  | (18-16-17-15) | -175.0 |
| (18-16-17-19) | 2.9    | (18-16-17-20) | 119.1  | (20-16-17-15) | 65.9   |
| (20-16-17-19) | -116.2 | (5-16-20-15)  | 51.0   | (5-16-20-17)  | 99.2   |
| (5-16-20-21)  | -5.3   | (5-16-20-23)  | -111.0 | (5-16-20-25)  | 149.3  |
| (17-16-20-5)  | -99.2  | (17-16-20-15) | -48.2  | (17-16-20-21) | -104.6 |
| (17-16-20-23) | 149.8  | (17-16-20-25) | 50.1   | (18-16-20-5)  | 129.4  |
| (18-16-20-15) | -179.6 | (18-16-20-17) | -131.4 | (18-16-20-21) | 124.0  |
| (18-16-20-23) | 18.4   | (18-16-20-25) | -81.3  | (15-17-20-5)  | -50.6  |
| (15-17-20-16) | -100.0 | (15-17-20-21) | 20.7   | (15-17-20-23) | -138.1 |
| (15-17-20-25) | 122.1  | (16-17-20-5)  | 49.4   | (16-17-20-15) | 100.0  |
| (16-17-20-21) | 120.6  | (16-17-20-23) | -38.1  | (16-17-20-25) | -137.9 |
| (19-17-20-5)  | 179.6  | (19-17-20-15) | -129.8 | (19-17-20-16) | 130.2  |
| (19-17-20-21) | -109.1 | (19-17-20-23) | 92.1   | (19-17-20-25) | -7.7   |
| (5-20-21-22)  | 15.7   | (15-20-21-22) | -27.0  | (16-20-21-22) | 19.3   |
| (17-20-21-22) | -40.4  | (23-20-21-22) | 122.2  | (25-20-21-22) | -138.5 |
| (5-20-23-24)  | -8.4   | (15-20-23-24) | 2.7    | (16-20-23-24) | 31.7   |
| (17-20-23-24) | 55.3   | (21-20-23-24) | -109.1 | (25-20-23-24) | 151.3  |
| (5-20-25-26)  | -47.1  | (15-20-25-26) | -23.2  | (16-20-25-26) | -89.5  |
| (17-20-25-26) | -59.6  | (21-20-25-26) | 74.3   | (23-20-25-26) | 174.7  |

|                                  |       |       |       |       |       |       |       |        |        |        |
|----------------------------------|-------|-------|-------|-------|-------|-------|-------|--------|--------|--------|
| Frequencies (cm <sup>-1</sup> ): | 18.3  | 23.9  | 33.0  | 45.1  | 65.3  | 87.8  | 88.6  | 89.4   |        |        |
|                                  | 92.9  | 106.3 | 107.8 | 132.9 | 133.3 | 139.1 | 149.5 | 252.3  | 258.8  | 342.4  |
|                                  | 358.6 | 368.0 | 384.4 | 410.7 | 417.4 | 445.4 | 452.8 | 468.2  | 475.4  | 475.6  |
|                                  | 484.1 | 496.7 | 514.5 | 518.8 | 519.1 | 522.2 | 527.4 | 534.4  | 598.3  | 606.5  |
|                                  | 607.1 | 611.4 | 619.6 | 627.9 | 649.5 | 659.4 | 766.3 | 768.8  | 827.6  | 831.4  |
|                                  | 840.1 | 841.9 | 937.9 | 941.1 | 967.1 | 985.5 | 986.7 | 1071.7 | 1101.6 | 1132.9 |

1203.5 1205.3 1275.5 1340.4 1349.0 1367.0 1384.0 1567.2 2080.0 2081.5  
 2087.7 2092.2 2122.2 2141.6 3265.6 3265.7 3279.0 3279.3 3290.8 3291.1

(12 TS) B3LYP/6-31G(d)+LANL2DZ C<sub>1</sub> Geometry

|                                         |                |          |
|-----------------------------------------|----------------|----------|
| Nuclear repulsion energy                | 2086.30750923  | Hartrees |
| B3LYP/6-31G(d)+LANL2DZ energy           | -1235.28009214 | Hartrees |
| Zero-point energy correction            | 0.162741       | Hartrees |
| Thermal correction to Enthalpy          | 0.185028       | Hartrees |
| Thermal correction to Gibbs Free Energy | 0.109971       | Hartrees |

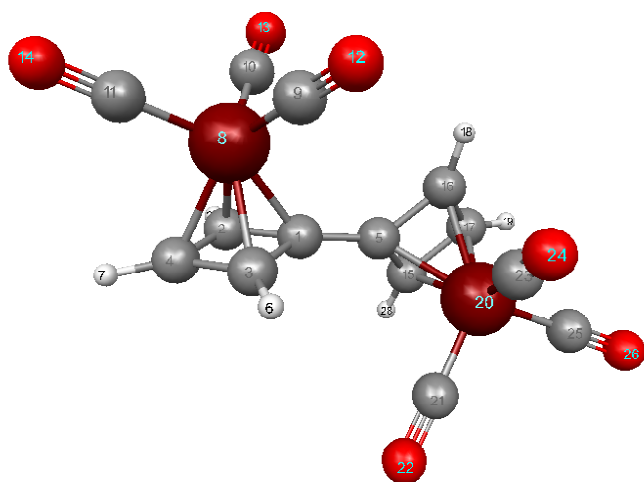

|      | X         | Y         | Z         |
|------|-----------|-----------|-----------|
| C1   | 0.615936  | 0.358339  | -0.847745 |
| C2   | 1.674179  | 0.533933  | -1.855460 |
| C3   | 1.093000  | 1.586835  | -0.192850 |
| C4   | 2.123217  | 1.728084  | -1.188628 |
| C5   | -0.615794 | -0.422363 | -0.827413 |
| H6   | 0.721195  | 2.201773  | 0.614879  |
| H7   | 2.897619  | 2.458137  | -1.380290 |
| Fe8  | 2.429107  | 0.039893  | -0.005062 |
| C9   | 1.966581  | -0.272440 | 1.685322  |
| C10  | 2.771453  | -1.630907 | -0.513179 |
| C11  | 4.113596  | 0.554013  | 0.298210  |
| O12  | 1.646131  | -0.475860 | 2.773433  |
| O13  | 2.965785  | -2.713644 | -0.857122 |
| O14  | 5.198511  | 0.892212  | 0.489911  |
| C15  | -1.688331 | -0.632607 | -1.817232 |
| C16  | -1.095227 | -1.611940 | -0.114273 |
| C17  | -2.137214 | -1.794219 | -1.086782 |
| H18  | -0.733232 | -2.177751 | 0.733304  |
| H19  | -2.915247 | -2.530529 | -1.234327 |
| Fe20 | -2.427729 | -0.041822 | -0.000495 |
| C21  | -2.582167 | 1.662646  | -0.483611 |
| O22  | -2.651492 | 2.764195  | -0.815351 |
| C23  | -2.087663 | 0.191010  | 1.733404  |
| O24  | -1.853315 | 0.343270  | 2.851245  |
| C25  | -4.168778 | -0.414272 | 0.146367  |
| O26  | -5.292873 | -0.655443 | 0.226816  |
| H27  | 1.926315  | 0.037160  | -2.782446 |
| H28  | -1.931198 | -0.193143 | -2.774885 |

|           |       |           |       |          |       |           |       |         |       |
|-----------|-------|-----------|-------|----------|-------|-----------|-------|---------|-------|
| (1-2)     | 1.472 | (1-3)     | 1.472 | (1-5)    | 1.458 | (1-8)     | 2.025 | (2-4)   | 1.440 |
| (2-8)     | 2.059 | (2-27)    | 1.082 | (3-4)    | 1.440 | (3-6)     | 1.081 | (3-8)   | 2.053 |
| (4-7)     | 1.081 | (4-8)     | 2.084 | (5-15)   | 1.475 | (5-16)    | 1.467 | (5-20)  | 2.028 |
| (8-9)     | 1.780 | (8-10)    | 1.780 | (8-11)   | 1.787 | (9-12)    | 1.152 | (10-13) | 1.153 |
| (11-14)   | 1.152 | (15-17)   | 1.444 | (15-20)  | 2.048 | (15-28)   | 1.081 | (16-17) | 1.437 |
| (16-18)   | 1.081 | (16-20)   | 2.062 | (17-19)  | 1.081 | (17-20)   | 2.082 | (20-21) | 1.778 |
| (20-23)   | 1.782 | (20-25)   | 1.786 | (21-22)  | 1.153 | (23-24)   | 1.152 | (25-26) | 1.152 |
| (2-1-3)   | 88.4  | (2-1-5)   | 132.9 | (2-1-8)  | 70.1  | (3-1-5)   | 135.6 |         |       |
| (3-1-8)   | 69.9  | (5-1-8)   | 131.8 | (1-2-4)  | 90.3  | (1-2-8)   | 67.6  |         |       |
| (1-2-27)  | 134.4 | (4-2-8)   | 70.6  | (4-2-27) | 134.9 | (8-2-27)  | 125.1 |         |       |
| (1-3-4)   | 90.3  | (1-3-6)   | 134.1 | (1-3-8)  | 67.8  | (4-3-6)   | 135.0 |         |       |
| (4-3-8)   | 70.8  | (6-3-8)   | 125.7 | (2-4-3)  | 90.9  | (2-4-7)   | 134.5 |         |       |
| (2-4-8)   | 68.7  | (3-4-7)   | 134.5 | (3-4-8)  | 68.5  | (7-4-8)   | 122.8 |         |       |
| (1-5-15)  | 132.9 | (1-5-16)  | 135.8 | (1-5-20) | 131.3 | (15-5-16) | 88.5  |         |       |
| (15-5-20) | 69.5  | (16-5-20) | 70.2  | (1-8-2)  | 42.2  | (1-8-3)   | 42.3  |         |       |
| (1-8-4)   | 60.3  | (1-8-9)   | 101.0 | (1-8-10) | 101.6 | (1-8-11)  | 150.4 |         |       |
| (2-8-3)   | 59.9  | (2-8-4)   | 40.7  | (2-8-9)  | 143.2 | (2-8-10)  | 92.2  |         |       |
| (2-8-11)  | 115.4 | (3-8-4)   | 40.7  | (3-8-9)  | 92.9  | (3-8-10)  | 143.8 |         |       |

|              |        |              |        |              |        |            |       |
|--------------|--------|--------------|--------|--------------|--------|------------|-------|
| (3-8-11)     | 114.3  | (4-8-9)      | 130.0  | (4-8-10)     | 128.8  | (4-8-11)   | 90.1  |
| (9-8-10)     | 99.0   | (9-8-11)     | 97.7   | (10-8-11)    | 97.9   | (8-9-12)   | 178.9 |
| (8-10-13)    | 178.5  | (8-11-14)    | 179.6  | (5-15-17)    | 90.1   | (5-15-20)  | 68.0  |
| (5-15-28)    | 134.4  | (17-15-20)   | 70.8   | (17-15-28)   | 134.8  | (20-15-28) | 126.0 |
| (5-16-17)    | 90.6   | (5-16-18)    | 134.1  | (5-16-20)    | 67.7   | (17-16-18) | 135.0 |
| (17-16-20)   | 70.5   | (18-16-20)   | 124.8  | (15-17-16)   | 90.9   | (15-17-19) | 134.6 |
| (15-17-20)   | 68.3   | (16-17-19)   | 134.5  | (16-17-20)   | 69.0   | (19-17-20) | 122.9 |
| (5-20-15)    | 42.4   | (5-20-16)    | 42.0   | (5-20-17)    | 60.3   | (5-20-21)  | 98.4  |
| (5-20-23)    | 104.5  | (5-20-25)    | 149.9  | (15-20-16)   | 59.9   | (15-20-17) | 40.9  |
| (15-20-21)   | 93.8   | (15-20-23)   | 146.3  | (15-20-25)   | 111.4  | (16-20-17) | 40.6  |
| (16-20-21)   | 140.4  | (16-20-23)   | 91.7   | (16-20-25)   | 118.4  | (17-20-21) | 132.6 |
| (17-20-23)   | 126.2  | (17-20-25)   | 90.2   | (21-20-23)   | 99.0   | (21-20-25) | 97.9  |
| (23-20-25)   | 97.7   | (20-21-22)   | 178.2  | (20-23-24)   | 179.3  | (20-25-26) | 179.3 |
| (3-1-2-4)    | 0.3    | (3-1-2-8)    | 69.1   | (3-1-2-27)   | -173.0 |            |       |
| (5-1-2-4)    | 162.0  | (5-1-2-8)    | -129.1 | (5-1-2-27)   | -11.3  |            |       |
| (8-1-2-4)    | -68.8  | (8-1-2-27)   | 117.8  | (2-1-3-4)    | -0.3   |            |       |
| (2-1-3-6)    | 171.7  | (2-1-3-8)    | -69.4  | (5-1-3-4)    | -161.1 |            |       |
| (5-1-3-6)    | 10.9   | (5-1-3-8)    | 129.8  | (8-1-3-4)    | 69.1   |            |       |
| (8-1-3-6)    | -118.9 | (2-1-5-15)   | -44.4  | (2-1-5-16)   | 110.2  |            |       |
| (2-1-5-20)   | -144.9 | (3-1-5-15)   | 109.0  | (3-1-5-16)   | -96.4  |            |       |
| (3-1-5-20)   | 8.5    | (8-1-5-15)   | -146.4 | (8-1-5-16)   | 8.2    |            |       |
| (8-1-5-20)   | 113.2  | (2-1-8-3)    | 95.8   | (2-1-8-4)    | 47.8   |            |       |
| (2-1-8-9)    | 177.9  | (2-1-8-10)   | -80.4  | (2-1-8-11)   | 49.8   |            |       |
| (3-1-8-2)    | -95.8  | (3-1-8-4)    | -48.0  | (3-1-8-9)    | 82.1   |            |       |
| (3-1-8-10)   | -176.2 | (3-1-8-11)   | -46.0  | (5-1-8-2)    | 130.3  |            |       |
| (5-1-8-3)    | -133.9 | (5-1-8-4)    | 178.2  | (5-1-8-9)    | -51.7  |            |       |
| (5-1-8-10)   | 49.9   | (5-1-8-11)   | -179.9 | (1-2-4-3)    | -0.3   |            |       |
| (1-2-4-7)    | -178.2 | (1-2-4-8)    | 66.1   | (8-2-4-3)    | -66.4  |            |       |
| (8-2-4-7)    | 115.7  | (27-2-4-3)   | 173.0  | (27-2-4-7)   | -5.0   |            |       |
| (27-2-4-8)   | -120.6 | (1-2-8-3)    | -50.7  | (1-2-8-4)    | -98.7  |            |       |
| (1-2-8-9)    | -3.4   | (1-2-8-10)   | 104.8  | (1-2-8-11)   | -155.3 |            |       |
| (4-2-8-1)    | 98.7   | (4-2-8-3)    | 48.0   | (4-2-8-9)    | 95.3   |            |       |
| (4-2-8-10)   | -156.4 | (4-2-8-11)   | -56.6  | (27-2-8-1)   | -129.5 |            |       |
| (27-2-8-3)   | 179.8  | (27-2-8-4)   | 131.8  | (27-2-8-9)   | -132.9 |            |       |
| (27-2-8-10)  | -24.6  | (27-2-8-11)  | 75.2   | (1-3-4-2)    | 0.3    |            |       |
| (1-3-4-7)    | 178.2  | (1-3-4-8)    | -66.3  | (6-3-4-2)    | -171.6 |            |       |
| (6-3-4-7)    | 6.3    | (6-3-4-8)    | 121.8  | (8-3-4-2)    | 66.6   |            |       |
| (8-3-4-7)    | -115.4 | (1-3-8-2)    | 50.6   | (1-3-8-4)    | 98.6   |            |       |
| (1-3-8-9)    | -103.2 | (1-3-8-10)   | 6.3    | (1-3-8-11)   | 157.0  |            |       |
| (4-3-8-1)    | -98.6  | (4-3-8-2)    | -47.9  | (4-3-8-9)    | 158.3  |            |       |
| (4-3-8-10)   | -92.3  | (4-3-8-11)   | 58.5   | (6-3-8-1)    | 129.2  |            |       |
| (6-3-8-2)    | 179.9  | (6-3-8-4)    | -132.2 | (6-3-8-9)    | 26.1   |            |       |
| (6-3-8-10)   | 135.5  | (6-3-8-11)   | -73.7  | (2-4-8-1)    | -49.9  |            |       |
| (2-4-8-3)    | -99.9  | (2-4-8-9)    | -128.8 | (2-4-8-10)   | 30.8   |            |       |
| (2-4-8-11)   | 131.0  | (3-4-8-1)    | 50.0   | (3-4-8-2)    | 99.9   |            |       |
| (3-4-8-9)    | -28.9  | (3-4-8-10)   | 130.7  | (3-4-8-11)   | -129.0 |            |       |
| (7-4-8-1)    | 180.0  | (7-4-8-2)    | -130.1 | (7-4-8-3)    | 130.0  |            |       |
| (7-4-8-9)    | 101.1  | (7-4-8-10)   | -99.3  | (7-4-8-11)   | 0.9    |            |       |
| (1-5-15-17)  | 162.8  | (1-5-15-20)  | -128.0 | (1-5-15-28)  | -8.5   |            |       |
| (16-5-15-17) | 0.3    | (16-5-15-20) | 69.5   | (16-5-15-28) | -171.1 |            |       |
| (20-5-15-17) | -69.2  | (20-5-15-28) | 119.4  | (1-5-16-17)  | -162.0 |            |       |
| (1-5-16-18)  | 12.0   | (1-5-16-20)  | 129.5  | (15-5-16-17) | -0.3   |            |       |
| (15-5-16-18) | 173.7  | (15-5-16-20) | -68.8  | (20-5-16-17) | 68.5   |            |       |
| (20-5-16-18) | -117.6 | (1-5-20-15)  | 129.8  | (1-5-20-16)  | -134.3 |            |       |
| (1-5-20-17)  | 178.1  | (1-5-20-21)  | 43.4   | (1-5-20-23)  | -58.2  |            |       |
| (1-5-20-25)  | 165.6  | (15-5-20-16) | 95.9   | (15-5-20-17) | 48.3   |            |       |
| (15-5-20-21) | -86.4  | (15-5-20-23) | 172.0  | (15-5-20-25) | 35.8   |            |       |
| (16-5-20-15) | -95.9  | (16-5-20-17) | -47.7  | (16-5-20-21) | 177.6  |            |       |
| (16-5-20-23) | 76.0   | (16-5-20-25) | -60.1  | (1-8-9-12)   | 10.7   |            |       |
| (2-8-9-12)   | 13.1   | (3-8-9-12)   | 52.6   | (4-8-9-12)   | 71.0   |            |       |
| (10-8-9-12)  | -93.1  | (11-8-9-12)  | 167.6  | (1-8-10-13)  | -0.2   |            |       |
| (2-8-10-13)  | -41.8  | (3-8-10-13)  | -4.5   | (4-8-10-13)  | -61.3  |            |       |

|               |        |               |        |               |        |
|---------------|--------|---------------|--------|---------------|--------|
| (9-8-10-13)   | 103.0  | (11-8-10-13)  | -157.8 | (1-8-11-14)   | 3.4    |
| (2-8-11-14)   | 38.0   | (3-8-11-14)   | -28.7  | (4-8-11-14)   | 5.1    |
| (9-8-11-14)   | -125.4 | (10-8-11-14)  | 134.3  | (5-15-17-16)  | -0.3   |
| (5-15-17-19)  | -177.9 | (5-15-17-20)  | 66.6   | (20-15-17-16) | -66.9  |
| (20-15-17-19) | 115.4  | (28-15-17-16) | 171.0  | (28-15-17-19) | -6.6   |
| (28-15-17-20) | -122.0 | (5-15-20-16)  | -50.4  | (5-15-20-17)  | -98.2  |
| (5-15-20-21)  | 98.3   | (5-15-20-23)  | -14.1  | (5-15-20-25)  | -161.6 |
| (17-15-20-5)  | 98.2   | (17-15-20-16) | 47.8   | (17-15-20-21) | -163.5 |
| (17-15-20-23) | 84.1   | (17-15-20-25) | -63.5  | (28-15-20-5)  | -129.8 |
| (28-15-20-16) | 179.9  | (28-15-20-17) | 132.1  | (28-15-20-21) | -31.5  |
| (28-15-20-23) | -143.9 | (28-15-20-25) | 68.6   | (5-16-17-15)  | 0.3    |
| (5-16-17-19)  | 177.9  | (5-16-17-20)  | -66.0  | (18-16-17-15) | -173.6 |
| (18-16-17-19) | 4.1    | (18-16-17-20) | 120.1  | (20-16-17-15) | 66.3   |
| (20-16-17-19) | -116.1 | (5-16-20-15)  | 50.8   | (5-16-20-17)  | 99.1   |
| (5-16-20-21)  | -3.7   | (5-16-20-23)  | -110.0 | (5-16-20-25)  | 150.4  |
| (17-16-20-5)  | -99.1  | (17-16-20-15) | -48.2  | (17-16-20-21) | -102.8 |
| (17-16-20-23) | 150.9  | (17-16-20-25) | 51.3   | (18-16-20-5)  | 129.1  |
| (18-16-20-15) | 179.9  | (18-16-20-17) | -131.8 | (18-16-20-21) | 125.4  |
| (18-16-20-23) | 19.1   | (18-16-20-25) | -80.5  | (15-17-20-5)  | -50.2  |
| (15-17-20-16) | -99.8  | (15-17-20-21) | 22.6   | (15-17-20-23) | -136.8 |
| (15-17-20-25) | 123.6  | (16-17-20-5)  | 49.6   | (16-17-20-15) | 99.8   |
| (16-17-20-21) | 122.4  | (16-17-20-23) | -37.0  | (16-17-20-25) | -136.6 |
| (19-17-20-5)  | 179.8  | (19-17-20-15) | -130.0 | (19-17-20-16) | 130.2  |
| (19-17-20-21) | -107.4 | (19-17-20-23) | 93.2   | (19-17-20-25) | -6.5   |
| (5-20-21-22)  | 4.7    | (15-20-21-22) | -37.7  | (16-20-21-22) | 7.2    |
| (17-20-21-22) | -52.3  | (23-20-21-22) | 111.0  | (25-20-21-22) | -149.9 |
| (5-20-23-24)  | 16.0   | (15-20-23-24) | 25.8   | (16-20-23-24) | 56.6   |
| (17-20-23-24) | 79.6   | (21-20-23-24) | -85.2  | (25-20-23-24) | 175.5  |
| (5-20-25-26)  | -44.9  | (15-20-25-26) | -19.8  | (16-20-25-26) | -86.2  |
| (17-20-25-26) | -55.7  | (21-20-25-26) | 77.4   | (23-20-25-26) | 177.7  |

|                                  |        |        |        |        |        |        |        |        |        |        |
|----------------------------------|--------|--------|--------|--------|--------|--------|--------|--------|--------|--------|
| Frequencies (cm <sup>-1</sup> ): | -21.4  | 13.6   | 23.6   | 50.6   | 58.3   | 84.8   | 87.7   | 90.1   |        |        |
|                                  | 90.6   | 106.0  | 107.7  | 130.0  | 132.8  | 137.0  | 155.6  | 210.1  | 311.7  | 346.6  |
|                                  | 358.3  | 368.1  | 378.6  | 411.9  | 415.7  | 421.8  | 457.2  | 472.0  | 472.1  | 479.4  |
|                                  | 479.8  | 494.1  | 516.0  | 517.4  | 519.6  | 524.3  | 531.0  | 535.6  | 602.8  | 606.6  |
|                                  | 608.5  | 608.9  | 622.2  | 626.2  | 646.1  | 676.3  | 762.8  | 765.8  | 822.2  | 828.7  |
|                                  | 839.0  | 841.2  | 939.4  | 941.3  | 969.3  | 984.9  | 985.4  | 1082.7 | 1100.9 | 1119.6 |
|                                  | 1202.4 | 1202.5 | 1275.4 | 1341.0 | 1350.4 | 1363.1 | 1382.9 | 1558.6 | 2080.1 | 2087.0 |
|                                  | 2087.9 | 2095.3 | 2127.5 | 2140.8 | 3265.4 | 3265.6 | 3277.7 | 3278.3 | 3291.0 | 3291.4 |

**3,4-dimethylenecyclobutene-Fe(CO)<sub>3</sub>** B3LYP/6-31G(d)+LANL2DZ C<sub>s</sub> Geometry

|                                         |               |          |
|-----------------------------------------|---------------|----------|
| Nuclear repulsion energy                | 854.42276248  | Hartrees |
| B3LYP/6-31G(d)+LANL2DZ energy           | -695.59869412 | Hartrees |
| Zero-point energy correction            | 0.122502      | Hartrees |
| Thermal correction to Enthalpy          | 0.136408      | Hartrees |
| Thermal correction to Gibbs Free Energy | 0.082160      | Hartrees |

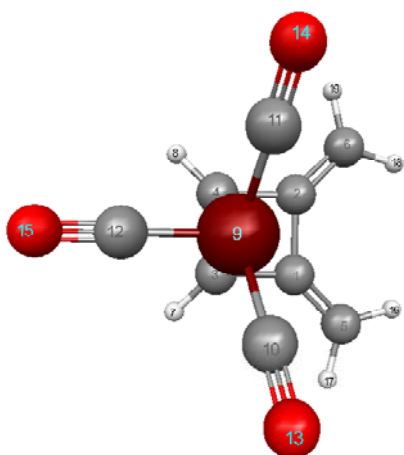

|     | X         | Y         | Z         |
|-----|-----------|-----------|-----------|
| C1  | 0.318965  | 1.932544  | 0.755138  |
| C2  | 0.318965  | 1.932544  | -0.755138 |
| C3  | 1.313336  | 0.820771  | 0.729036  |
| C4  | 1.313336  | 0.820771  | -0.729036 |
| C5  | -0.319141 | 2.650874  | 1.693640  |
| C6  | -0.319141 | 2.650874  | -1.693640 |
| H7  | 2.069408  | 0.558433  | 1.459606  |
| H8  | 2.069408  | 0.558433  | -1.459606 |
| Fe9 | -0.055530 | -0.460239 | 0.000000  |
| C10 | -0.974913 | -0.986352 | 1.478684  |
| C11 | -0.974913 | -0.986352 | -1.478684 |
| C12 | 1.011377  | -1.839915 | 0.000000  |
| O13 | -1.528961 | -1.320844 | 2.430184  |
| O14 | -1.528961 | -1.320844 | -2.430184 |
| O15 | 1.745858  | -2.729271 | 0.000000  |
| H16 | -1.032172 | 3.425187  | 1.424957  |
| H17 | -0.130700 | 2.496050  | 2.752200  |
| H18 | -1.032172 | 3.425187  | -1.424957 |
| H19 | -0.130700 | 2.496050  | -2.752200 |

|            |        |            |        |            |        |          |       |        |       |
|------------|--------|------------|--------|------------|--------|----------|-------|--------|-------|
| (1-2)      | 1.510  | (1-3)      | 1.492  | (1-5)      | 1.343  | (1-9)    | 2.537 | (2-4)  | 1.492 |
| (2-6)      | 1.343  | (2-9)      | 2.537  | (3-4)      | 1.458  | (3-7)    | 1.084 | (3-9)  | 2.012 |
| (4-8)      | 1.084  | (4-9)      | 2.012  | (5-16)     | 1.086  | (5-17)   | 1.086 | (6-18) | 1.086 |
| (6-19)     | 1.086  | (10-13)    | 1.151  | (11-14)    | 1.151  | (12-15)  | 1.153 |        |       |
| (2-1-3)    | 89.0   | (2-1-5)    | 134.3  | (2-1-9)    | 72.7   | (3-1-5)  | 136.7 |        |       |
| (3-1-9)    | 52.4   | (5-1-9)    | 130.0  | (1-2-4)    | 89.0   | (1-2-6)  | 134.3 |        |       |
| (1-2-9)    | 72.7   | (4-2-6)    | 136.7  | (4-2-9)    | 52.4   | (6-2-9)  | 130.0 |        |       |
| (1-3-4)    | 91.0   | (1-3-7)    | 129.3  | (1-3-9)    | 91.6   | (4-3-7)  | 132.4 |        |       |
| (4-3-9)    | 68.8   | (7-3-9)    | 124.4  | (2-4-3)    | 91.0   | (2-4-8)  | 129.3 |        |       |
| (2-4-9)    | 91.6   | (3-4-8)    | 132.4  | (3-4-9)    | 68.8   | (8-4-9)  | 124.4 |        |       |
| (1-5-16)   | 121.3  | (1-5-17)   | 121.5  | (16-5-17)  | 117.2  | (2-6-18) | 121.3 |        |       |
| (2-6-19)   | 121.5  | (18-6-19)  | 117.2  | (1-9-2)    | 34.6   | (1-9-3)  | 36.0  |        |       |
| (1-9-4)    | 53.6   | (2-9-3)    | 53.6   | (2-9-4)    | 36.0   | (3-9-4)  | 42.5  |        |       |
| (3-1-2-4)  | 0.0    | (3-1-2-6)  | -179.8 | (3-1-2-9)  | 50.7   |          |       |        |       |
| (5-1-2-4)  | 179.8  | (5-1-2-6)  | 0.0    | (5-1-2-9)  | -129.5 |          |       |        |       |
| (9-1-2-4)  | -50.7  | (9-1-2-6)  | 129.5  | (2-1-3-4)  | 0.0    |          |       |        |       |
| (2-1-3-7)  | 152.4  | (2-1-3-9)  | -68.8  | (5-1-3-4)  | -179.8 |          |       |        |       |
| (5-1-3-7)  | -27.4  | (5-1-3-9)  | 111.4  | (9-1-3-4)  | 68.8   |          |       |        |       |
| (9-1-3-7)  | -138.9 | (2-1-5-16) | 1.2    | (2-1-5-17) | -177.6 |          |       |        |       |
| (3-1-5-16) | -179.1 | (3-1-5-17) | 2.1    | (9-1-5-16) | -104.8 |          |       |        |       |
| (9-1-5-17) | 76.4   | (2-1-9-3)  | 102.5  | (2-1-9-4)  | 45.5   |          |       |        |       |
| (3-1-9-2)  | -102.5 | (3-1-9-4)  | -57.1  | (5-1-9-2)  | 133.9  |          |       |        |       |
| (5-1-9-3)  | -123.6 | (5-1-9-4)  | 179.4  | (1-2-4-3)  | 0.0    |          |       |        |       |
| (1-2-4-8)  | -152.4 | (1-2-4-9)  | 68.8   | (6-2-4-3)  | 179.8  |          |       |        |       |
| (6-2-4-8)  | 27.4   | (6-2-4-9)  | -111.4 | (9-2-4-3)  | -68.8  |          |       |        |       |
| (9-2-4-8)  | 138.9  | (1-2-6-18) | -1.2   | (1-2-6-19) | 177.6  |          |       |        |       |
| (4-2-6-18) | 179.1  | (4-2-6-19) | -2.1   | (9-2-6-18) | 104.8  |          |       |        |       |
| (9-2-6-19) | -76.4  | (1-2-9-3)  | -45.5  | (1-2-9-4)  | -102.5 |          |       |        |       |
| (4-2-9-1)  | 102.5  | (4-2-9-3)  | 57.1   | (6-2-9-1)  | -133.9 |          |       |        |       |
| (6-2-9-3)  | -179.4 | (6-2-9-4)  | 123.6  | (1-3-4-2)  | 0.0    |          |       |        |       |
| (1-3-4-8)  | 150.9  | (1-3-4-9)  | -91.3  | (7-3-4-2)  | -150.9 |          |       |        |       |
| (7-3-4-8)  | 0.0    | (7-3-4-9)  | 117.8  | (9-3-4-2)  | 91.3   |          |       |        |       |
| (9-3-4-8)  | -117.8 | (1-3-9-2)  | 43.6   | (1-3-9-4)  | 90.5   |          |       |        |       |
| (4-3-9-1)  | -90.5  | (4-3-9-2)  | -46.9  | (7-3-9-1)  | 141.9  |          |       |        |       |
| (7-3-9-2)  | -174.5 | (7-3-9-4)  | -127.6 | (2-4-9-1)  | -43.6  |          |       |        |       |
| (2-4-9-3)  | -90.5  | (3-4-9-1)  | 46.9   | (3-4-9-2)  | 90.5   |          |       |        |       |
| (8-4-9-1)  | 174.5  | (8-4-9-2)  | -141.9 | (8-4-9-3)  | 127.6  |          |       |        |       |

Frequencies (cm<sup>-1</sup>): -35.8 58.4 67.9 73.3 79.7 100.5 107.1 141.4  
 251.9 332.6 363.4 389.7 409.2 416.3 454.1 460.1 464.4 467.7

|        |        |        |        |        |        |        |        |        |        |
|--------|--------|--------|--------|--------|--------|--------|--------|--------|--------|
| 512.5  | 557.8  | 581.7  | 610.7  | 685.8  | 688.5  | 716.5  | 754.9  | 778.2  | 834.9  |
| 849.7  | 880.6  | 883.3  | 923.4  | 950.6  | 1019.5 | 1165.3 | 1206.3 | 1255.5 | 1325.0 |
| 1452.7 | 1476.0 | 1682.8 | 1715.7 | 2082.4 | 2088.5 | 2135.8 | 3169.1 | 3169.5 | 3231.1 |
| 3246.7 | 3251.4 | 3252.3 |        |        |        |        |        |        |        |

**3,4-dimethylenecyclobutene-Fe(CO)<sub>3</sub>** B3LYP/6-31G(d)+LANL2DZ C<sub>1</sub> Geometry

|                                         |                        |
|-----------------------------------------|------------------------|
| Nuclear repulsion energy                | 872.87482554 Hartrees  |
| B3LYP/6-31G(d)+LANL2DZ energy           | -695.60392954 Hartrees |
| Zero-point energy correction            | 0.123687 Hartrees      |
| Thermal correction to Enthalpy          | 0.137929 Hartrees      |
| Thermal correction to Gibbs Free Energy | 0.083339 Hartrees      |

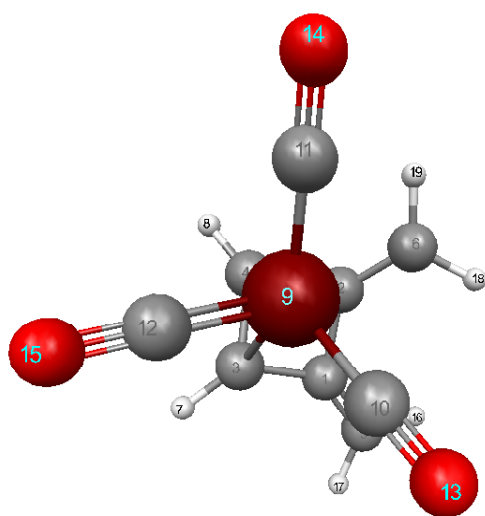

|     | X         | Y         | Z         |
|-----|-----------|-----------|-----------|
| C1  | 2.209707  | -0.117149 | -0.431242 |
| C2  | 1.360672  | 1.122987  | -0.506232 |
| C3  | 1.155586  | -0.743532 | -1.265331 |
| C4  | 0.560035  | 0.532421  | -1.615948 |
| C5  | 3.396377  | -0.421281 | 0.099927  |
| C6  | 0.993684  | 2.014464  | 0.457236  |
| H7  | 1.112499  | -1.715573 | -1.744562 |
| H8  | 0.134765  | 0.947021  | -2.520003 |
| Fe9 | -0.411899 | 0.001592  | 0.012210  |
| C10 | -0.135242 | -0.772984 | 1.626057  |
| C11 | -1.786459 | 1.154047  | 0.133264  |
| C12 | -1.448835 | -1.276332 | -0.623334 |
| O13 | 0.038372  | -1.246862 | 2.660764  |
| O14 | -2.690863 | 1.866348  | 0.209719  |
| O15 | -2.095607 | -2.119491 | -1.070523 |
| H16 | 3.967284  | 0.314716  | 0.657708  |
| H17 | 3.831598  | -1.409281 | -0.013153 |
| H18 | 1.548725  | 2.069353  | 1.389698  |
| H19 | 0.266143  | 2.796570  | 0.266781  |

|            |        |            |        |            |       |           |       |        |       |
|------------|--------|------------|--------|------------|-------|-----------|-------|--------|-------|
| (1-2)      | 1.505  | (1-3)      | 1.483  | (1-5)      | 1.335 | (2-4)     | 1.490 | (2-6)  | 1.363 |
| (2-9)      | 2.161  | (3-4)      | 1.451  | (3-7)      | 1.085 | (3-9)     | 2.155 | (4-8)  | 1.082 |
| (4-9)      | 1.969  | (5-16)     | 1.086  | (5-17)     | 1.086 | (6-9)     | 2.495 | (6-18) | 1.087 |
| (6-19)     | 1.085  | (10-13)    | 1.151  | (11-14)    | 1.154 | (12-15)   | 1.153 |        |       |
| (2-1-3)    | 85.4   | (2-1-5)    | 135.2  | (3-1-5)    | 139.4 | (1-2-4)   |       | 90.8   |       |
| (1-2-6)    | 131.0  | (1-2-9)    | 91.3   | (4-2-6)    | 129.9 | (4-2-9)   |       | 62.1   |       |
| (6-2-9)    | 87.1   | (1-3-4)    | 93.2   | (1-3-7)    | 130.9 | (1-3-9)   |       | 92.2   |       |
| (4-3-7)    | 131.7  | (4-3-9)    | 62.7   | (7-3-9)    | 122.9 | (2-4-3)   |       | 87.0   |       |
| (2-4-8)    | 133.0  | (2-4-9)    | 75.9   | (3-4-8)    | 134.5 | (3-4-9)   |       | 76.5   |       |
| (8-4-9)    | 126.9  | (1-5-16)   | 121.2  | (1-5-17)   | 121.5 | (16-5-17) |       | 117.4  |       |
| (2-6-9)    | 59.9   | (2-6-18)   | 120.1  | (2-6-19)   | 121.9 | (9-6-18)  |       | 118.8  |       |
| (9-6-19)   | 99.9   | (18-6-19)  | 117.2  | (2-9-3)    | 56.0  | (2-9-4)   |       | 42.0   |       |
| (2-9-6)    | 33.1   | (3-9-4)    | 40.9   | (3-9-6)    | 88.6  | (4-9-6)   |       | 69.6   |       |
| (3-1-2-4)  | -14.0  | (3-1-2-6)  | 135.4  | (3-1-2-9)  |       | 48.1      |       |        |       |
| (5-1-2-4)  | 162.8  | (5-1-2-6)  | -47.8  | (5-1-2-9)  |       | -135.1    |       |        |       |
| (2-1-3-4)  | 14.4   | (2-1-3-7)  | 173.0  | (2-1-3-9)  |       | -48.3     |       |        |       |
| (5-1-3-4)  | -162.1 | (5-1-3-7)  | -3.6   | (5-1-3-9)  |       | 135.1     |       |        |       |
| (2-1-5-16) | 2.1    | (2-1-5-17) | -177.5 | (3-1-5-16) |       | 177.2     |       |        |       |
| (3-1-5-17) | -2.4   | (1-2-4-3)  | 14.3   | (1-2-4-8)  |       | -141.2    |       |        |       |
| (1-2-4-9)  | 91.1   | (6-2-4-3)  | -135.6 | (6-2-4-8)  |       | 68.9      |       |        |       |
| (6-2-4-9)  | -58.9  | (9-2-4-3)  | -76.8  | (9-2-4-8)  |       | 127.7     |       |        |       |
| (1-2-6-9)  | -89.2  | (1-2-6-18) | 18.7   | (1-2-6-19) |       | -172.0    |       |        |       |
| (4-2-6-9)  | 49.3   | (4-2-6-18) | 157.1  | (4-2-6-19) |       | -33.5     |       |        |       |
| (9-2-6-18) | 107.9  | (9-2-6-19) | -82.8  | (1-2-9-3)  |       | -38.0     |       |        |       |
| (1-2-9-4)  | -90.2  | (1-2-9-6)  | 131.0  | (4-2-9-3)  |       | 52.2      |       |        |       |
| (4-2-9-6)  | -138.9 | (6-2-9-3)  | -169.0 | (6-2-9-4)  |       | 138.9     |       |        |       |
| (1-3-4-2)  | -14.6  | (1-3-4-8)  | 140.3  | (1-3-4-9)  |       | -90.8     |       |        |       |

|            |        |            |        |            |        |
|------------|--------|------------|--------|------------|--------|
| (7-3-4-2)  | -172.8 | (7-3-4-8)  | -18.0  | (7-3-4-9)  | 111.0  |
| (9-3-4-2)  | 76.2   | (9-3-4-8)  | -129.0 | (1-3-9-2)  | 38.7   |
| (1-3-9-4)  | 92.5   | (1-3-9-6)  | 32.7   | (4-3-9-2)  | -53.8  |
| (4-3-9-6)  | -59.8  | (7-3-9-2)  | -177.7 | (7-3-9-4)  | -123.9 |
| (7-3-9-6)  | 176.3  | (2-4-9-3)  | -90.3  | (2-4-9-6)  | 22.5   |
| (3-4-9-2)  | 90.3   | (3-4-9-6)  | 112.8  | (8-4-9-2)  | -133.6 |
| (8-4-9-3)  | 136.0  | (8-4-9-6)  | -111.1 | (2-6-9-3)  | 9.1    |
| (2-6-9-4)  | -28.0  | (18-6-9-2) | -110.1 | (18-6-9-3) | -101.0 |
| (18-6-9-4) | -138.1 | (19-6-9-2) | 121.2  | (19-6-9-3) | 130.3  |
| (19-6-9-4) | 93.2   |            |        |            |        |

|                                  |        |        |        |        |        |        |        |        |        |        |
|----------------------------------|--------|--------|--------|--------|--------|--------|--------|--------|--------|--------|
| Frequencies (cm <sup>-1</sup> ): | 57.0   | 70.3   | 79.5   | 96.9   | 102.6  | 113.2  | 159.0  | 175.3  |        |        |
|                                  | 241.7  | 317.5  | 375.2  | 411.2  | 434.6  | 447.2  | 459.1  | 474.9  | 480.8  | 493.2  |
|                                  | 530.9  | 562.3  | 596.4  | 632.2  | 697.8  | 719.2  | 753.8  | 767.7  | 779.5  | 805.4  |
|                                  | 839.1  | 856.7  | 925.4  | 949.3  | 958.1  | 1037.3 | 1156.4 | 1190.8 | 1256.2 | 1326.6 |
|                                  | 1447.4 | 1474.6 | 1632.6 | 1751.0 | 2076.1 | 2086.4 | 2129.4 | 3173.7 | 3176.9 | 3229.7 |
|                                  | 3254.3 | 3263.8 | 3266.0 |        |        |        |        |        |        |        |
